# Supplementary material for: Oxidant controlled regioselective mono- and di-functionalization reactions of coumarins
Source: Royal Society of Chemistry journal article supplement (doi:10.1039/c5cc06200d), 2015-01-01
Supplement: c5cc06200d1.pdf [file c5cc06200d1.pdf]

## Supporting Informations

### **Oxidant controlled regioselective mono- and di-functionalizations of coumarins**

Arghya Banerjee, Sourav Kumar Santra, Nilufa Khatun, Wajid Ali and Bhisma K. Patel\*

Department of Chemistry, Indian Institute of Technology Guwahati

Email: [patel@iitg.ernet.in](mailto:patel@iitg.ernet.in)

#### **Contents:**

|                                        |         |
|----------------------------------------|---------|
| 1. Instrumentation and chemicals       | S2      |
| 2. Experimental procedure              | S2-S3   |
| 3. Crystallographic description        | S4-S5   |
| 4. Optimization of reaction parameters | S5      |
| 5. Mechanistic investigations          | S6-S7   |
| 6. Spectral data of all compounds      | S8-S19  |
| 7. Spectra of all compounds            | S20-S77 |

## Instrumentation and Chemicals:

All the reagents were commercial grade and purified according to the established procedures. Organic extracts were dried over anhydrous sodium sulphate. Solvents were removed in a rotary evaporator under reduced pressure. Silica gel (60-120 mesh size) was used for the column chromatography. Reactions were monitored by TLC on silica gel 60 F<sub>254</sub> (0.25 mm). NMR spectra were recorded in CDCl<sub>3</sub> with tetramethylsilane as the internal standard for <sup>1</sup>H NMR (400 and 600 MHz), CDCl<sub>3</sub> solvent as the internal standard for <sup>13</sup>C NMR (100 and 150 MHz). MS spectra were recorded using ESI mode. IR spectra were recorded in KBr or neat. Starting materials (3-substituted coumarins) (**1-15**) are prepared by reacting salicylaldehydes with active methylene compounds (diethyl malonate / ethylcyanoacetate / ethyl acetoacetate etc.) in presence of catalytic amount of piperidine using Knoevenagel condensation.<sup>1</sup>

1. M. Ghandi, A.-T. Ghomi, and M. Kubicki, *J. Org. Chem.*, 2013, **78**, 2611.

## Experimental procedure:

*(A) Synthesis of 3-cyclohexyl-2H-chromen-2-one (1a) from 3-acetyl-2H-chromen-2-one (1) and cyclohexane (a)*

To an oven dried 25 mL round bottom flask fitted with reflux condenser, 3-acetylcoumarin (**1**) (0.047g, 0.25 mmol), di-*tert*-butylperoxide DTBP (0.146g, 1.0 mmol), Fe(acac)<sub>3</sub> (0.004g, 0.013 mmol) and cyclohexane (**a**) (0.5 mL, 4.6 mmol) were added together in chlorobenzene (1.0 mL) solvent. The reaction mixture was then heated in an oil bath at 110 °C. The progress of the reaction was monitored by TLC and after completion of reaction (12 h) solvents were evaporated under reduced pressure. The reaction mixture was then cooled to room

temperature, admixed with water (2 mL). It was then extracted with ethyl acetate (3 x 10 mL), dried over anhydrous sodium sulphate  $\text{Na}_2\text{SO}_4$ , and evaporated under reduced pressure. The crude product obtained here was further purified over a short column of silica gel (hexane / ethyl acetate, 10:0.1) to give pure 3-cyclohexyl-2*H*-chromen-2-one (**1a**) (0.030g, yield 52%). The identity and purity of the product was confirmed by spectroscopic analysis.

*(B) Synthesis of 3-Acetyl-3-(tert-butylperoxy)-4-cyclohexylchroman-2-one (1a') from 3-acetyl-2H-chromen-2-one (1), tert-butyl hydroperoxide and cyclohexane (a)*

To an oven-dried 25 mL round bottom flask fitted with a reflux condenser was added 3-acetylcoumarin (**1**) (0.047g, 0.25 mmol), decane solution of TBHP (5–6 M) (200  $\mu\text{L}$ , 1.0 mmol), AcOH (30  $\mu\text{L}$ , 0.50 mmol), and cyclohexane (**a**) (0.5 mL, 4.6 mmol) in chlorobenzene (1.0 mL) solvent. The reaction mixture was heated in an oil bath at 110 °C. After completion (3 h) of the reaction, solvents were evaporated under reduced pressure. The reaction mixture was then cooled to room temperature and admixed with water (2 mL). The product was extracted with ethyl acetate (2 x 10 mL), dried over anhydrous sodium sulphate ( $\text{Na}_2\text{SO}_4$ ), and evaporated under reduced pressure. The crude product so obtained was purified over a column of silica gel (hexane / ethyl acetate, 10:0.1) to give pure 3-acetyl-3-(*tert*-butylperoxy)-4-cyclohexylchroman-2-one (**1a'**) (0.058g, yield 65%). The identity and purity of the product was confirmed by spectroscopic analysis.

## Crystallographic Description

Crystal data were collected with Bruker Smart Apex-II CCD diffractometer using graphite monochromated MoK $\alpha$  radiation ( $\lambda = 0.71073 \text{ \AA}$ ) at 298 K. Cell parameters were retrieved using SMART<sup>a</sup> software and refined with SAINT<sup>a</sup> on all observed reflections. Data reduction was performed with the SAINT software and corrected for Lorentz and polarization effects. Absorption corrections were applied with the program SADABS<sup>b</sup>. The structure was solved by direct methods implemented in SHELX-97<sup>c</sup> program and refined by full-matrix least-squares methods on F<sup>2</sup>. All non-hydrogen atomic positions were located in difference Fourier maps and refined anisotropically. The hydrogen atoms were placed in their geometrically generated positions. colourless crystals were isolated in rectangular shape from acetonitrile at room temperature.

- a. SMART V 4.043 Software for the CCD Detector System; Siemens Analytical Instruments Division: Madison, WI, 1995.
- b. SAINT V 4.035 Software for the CCD Detector System; Siemens Analytical Instruments Division: Madison, WI, 1995.
- c. Sheldrick, G. M. SHELXL-97, Program for the Refinement of Crystal Structures; University of Göttingen: Göttingen (Germany), 1997.

**CCDC number for compound 1c:** CCDC 1412809. This data can be obtained free of charge from the Cambridge Crystallographic Data Centre via [www.ccdc.cam.ac.uk/datarequest/cif](http://www.ccdc.cam.ac.uk/datarequest/cif).

**Crystallographic description of 1c:** Crystal dimension (mm): 0.38 x 0.20 x 0.16.  $C_{17}H_{20}O_2$ , Mr = 256.33. triclinic, space group  $P-1$ ;  $a = 6.7321(3) \text{ \AA}$ ,  $b = 9.3720(4) \text{ \AA}$ ,  $c = 11.4758(5) \text{ \AA}$ ;  $\alpha = 95.498(3)^\circ$ ,  $\beta = 99.490(3)^\circ$ ,  $\gamma = 104.725(3)^\circ$ ,  $V = 683.45(5) \text{ \AA}^3$ ;  $Z = 2$ ;  $\rho_{\text{cal}} = 1.246 \text{ g/cm}^3$ ;  $\mu (\text{mm}^{-1}) = 0.080$ ;  $F(000) = 276.0$ ; Reflection collected / unique = 2348 / 1909; Refinement method = Full-matrix least-squares on  $F^2$ ; Final R indices [ $I > 2\sigma_I$ ] R1 = 0.0389, wR2 = 0.0985, R indices (all data) R1 = 0.0480, wR2 = 0.1132; goodness of fit = 1.079.

**Table S1. Optimization of reaction parameters**

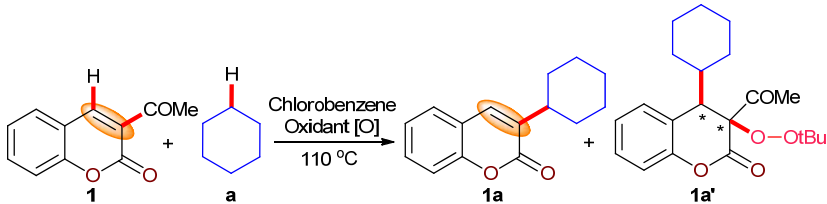

| Entry                 | Catalyst (mol %)                      | Additive (equiv.) | Oxidant <sup>d</sup> (equiv.) | Yield (%) <sup>a,b</sup> |            |
|-----------------------|---------------------------------------|-------------------|-------------------------------|--------------------------|------------|
|                       |                                       |                   |                               | <b>1a</b>                | <b>1a'</b> |
| 1                     | —                                     | —                 | DTBP (3.0)                    | 20                       | 00         |
| 2                     | —                                     | —                 | DTBP (4.0)                    | 40                       | 00         |
| 3                     | Cu(OAc) <sub>2</sub> (10.0)           | —                 | DTBP (4.0)                    | 34                       | 00         |
| 4                     | CuCl <sub>2</sub> (10.0)              | —                 | DTBP (4.0)                    | 38                       | 00         |
| 5                     | FeCl <sub>2</sub> (10.0)              | —                 | DTBP (4.0)                    | 26                       | 00         |
| 6                     | Fe <sub>3</sub> O <sub>4</sub> (10.0) | —                 | DTBP (4.0)                    | Trace                    | 00         |
| 7                     | Fe(acac) <sub>3</sub> (10.0)          | —                 | DTBP (4.0)                    | 53                       | 00         |
| <b>8</b>              | <b>Fe(acac)<sub>3</sub> (5.0)</b>     | —                 | <b>DTBP (4.0)</b>             | <b>52</b>                | <b>00</b>  |
| 9                     | Fe(acac) <sub>3</sub> (5.0)           | AcOH (1.0)        | DTBP (4.0)                    | 47                       | 00         |
| 10                    | —                                     | AcOH (1.0)        | DTBP (4.0)                    | 00                       | 00         |
| 11                    | —                                     | PTSA (1.0)        | DTBP (4.0)                    | 00                       | 00         |
| 12 <sup>c</sup>       | —                                     | AcOH (1.0)        | TBHP (4.0)                    | 00                       | 54         |
| 13 <sup>c</sup>       | —                                     | PTSA (1.0)        | TBHP (4.0)                    | 00                       | 00         |
| 14 <sup>c</sup>       | —                                     | TfOH (1.0)        | TBHP (4.0)                    | 00                       | 00         |
| 15 <sup>c</sup>       | —                                     | PhCOOH (1.0)      | TBHP (4.0)                    | 00                       | 30         |
| 16 <sup>c</sup>       | —                                     | PivOH (1.0)       | TBHP (4.0)                    | 00                       | 27         |
| <b>17<sup>c</sup></b> | —                                     | <b>AcOH (2.0)</b> | <b>TBHP (4.0)</b>             | <b>00</b>                | <b>65</b>  |
| 18 <sup>c</sup>       | —                                     | —                 | TBHP (4.0)                    | 00                       | 08         |

<sup>a</sup>Reaction conditions: **1** (0.25 mmol), cyclohexane (**a**) (0.5 mL, 4.6 mmol) in chlorobenzene (1.0 mL) at 110 °C for 12 h. <sup>b</sup>Isolated yield. <sup>c</sup>Reaction performed for 3 h. <sup>d</sup>Oxidants were used portion wise (four times for both DTBP and TBHP).

## Mechanistic investigation:

### Trapping of cyclohexyl and benzyl intermediates with TEMPO during mono-functionalization:

An oven-dried 25 mL round bottom flask was charged with 3-acetylcoumarin (**1**) (0.047g, 0.25 mmol), di-*tert*-butylperoxide DTBP (0.146g, 1.0 mmol), Fe(acac)<sub>3</sub> (0.004g, 0.013 mmol), TEMPO (**A**) (0.039 g, 0.25 mmol) and cyclohexane (**a**) (0.5 mL, 4.6 mmol) in chlorobenzene (1.0 mL). The flask was fitted with a reflux condenser and the reaction mixture was stirred in a preheated oil bath at 110 °C for 12 h. After 12 h of the reaction and usual work up the cyclohexyl-TEMPO adduct 1-(cyclohexyloxy)-2,2,6,6-tetramethylpiperidine (**1A**) was obtained in 64% isolated yield with no traces of the desired product (**1a**).

Similar reaction between 3-acetylcoumarin (**1**) (0.047g, 0.25 mmol) and toluene (**a**) (0.5 mL, 4.7 mmol) in the presence of radical scavenger TEMPO (**A**) (0.039 g, 0.25 mmol) under otherwise identical reaction conditions to that of above provided benzyl-TEMPO adduct 1-(benzyloxy)-2,2,6,6-tetramethylpiperidine (**1B**) in 57% isolated yield with no trace of desired product (**1a**).

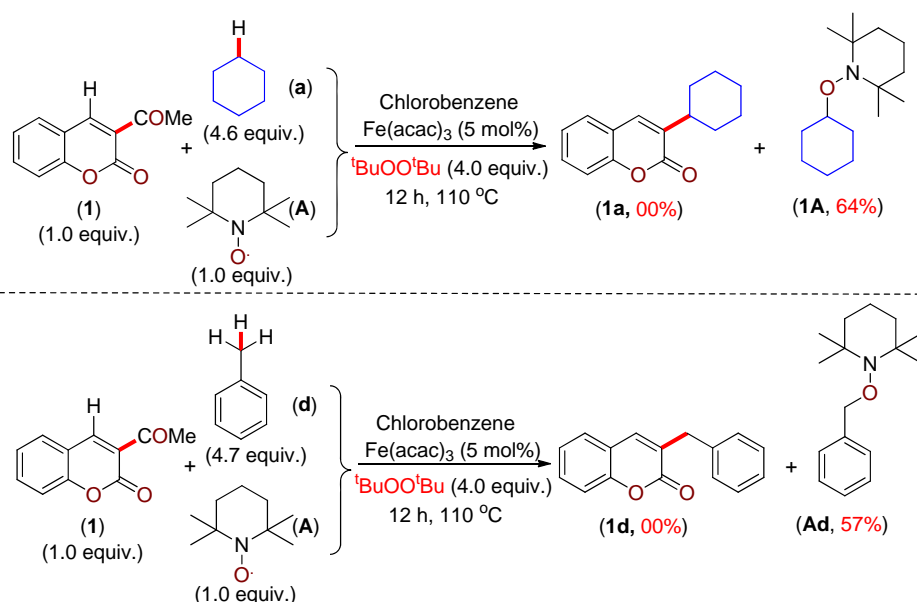

**Scheme S 2:** Control experiments with radical scavenger TEMPO

### Trapping of cyclohexyl intermediate with TEMPO during di-functionalization:

An oven-dried 25 mL round bottom flask was charged with 3-acetylcoumarin (**1**) (0.047g, 0.25 mmol), decane solution of TBHP (5–6 M) (200  $\mu$ L, 1.0 mmol), AcOH (30  $\mu$ L, 0.50 mmol), TEMPO (**A**) (0.039 g, 0.25 mmol) and cyclohexane (**a**) (0.5 mL, 4.6 mmol) in chlorobenzene (1.0 mL). The flask was fitted to a reflux condenser and the reaction mixture was stirred in a preheated oil bath at 110  $^{\circ}$ C. After 3 h of the reaction and usual work up, the cyclohexyl-TEMPO adduct 1-(cyclohexyloxy)-2,2,6,6-tetramethylpiperidine (**1A**) was obtained in 54% isolated yield along with a trace of the desired product (**1a'**).

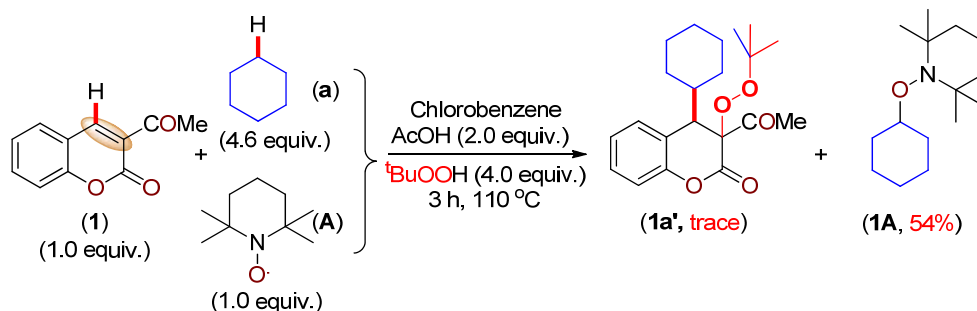

**Scheme S3:** control experiment with radical scavenger TEMPO

## Spectral Data:

### 3-Cyclohexyl-2H-chromen-2-one (1a):

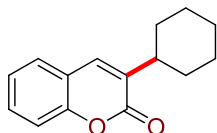

Semi-solid;  $^1\text{H}$  NMR ( $\text{CDCl}_3$ , 600 MHz):  $\delta$  7.47–7.44 (m, 3H), 7.31 (d, 1H,  $J = 8.4$  Hz), 7.24 (t, 1H,  $J = 7.2$  Hz), 2.81–2.76 (m, 1H), 1.98 (dd, 2H,  $J = 15.6, 4.2$  Hz), 1.87–1.84 (m, 2H), 1.80–1.77 (m, 1H), 1.49–1.41 (m, 2H), 1.34–1.24 (m, 3H);  $^{13}\text{C}$  NMR ( $\text{CDCl}_3$ , 150 MHz):  $\delta$  161.8, 152.9, 136.5, 135.2, 130.2, 127.5, 124.4, 119.9, 116.5, 38.4, 32.3, 26.7, 26.4; IR (KBr,  $\text{cm}^{-1}$ ): 3058, 2928, 2850, 1710, 1652, 1632, 1609, 1488, 1455, 1387, 1277, 1255, 1234, 1184, 1173, 1136, 1064, 1042, 986, 956, 924, 890, 781, 754; HRMS (ESI) calcd for  $\text{C}_{15}\text{H}_{16}\text{O}_2$  ( $\text{M} + \text{H}^+$ ) 229.1229, found 229.1224.

### 3-Cyclohexyl-7-methoxy-2H-chromen-2-one (2a):

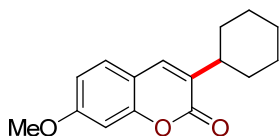

Semi-solid;  $^1\text{H}$  NMR ( $\text{CDCl}_3$ , 600 MHz):  $\delta$  7.38 (s, 1H), 7.33 (d, 1H,  $J = 8.4$  Hz), 6.83–6.79 (m, 2H), 3.85 (s, 3H), 2.75–2.71 (m, 1H), 1.96 (d, 2H,  $J = 12.0$  Hz), 1.86–1.82 (m, 2H), 1.78–1.75 (m, 1H), 1.45–1.40 (m, 2H), 1.30–1.26 (m, 3H);  $^{13}\text{C}$  NMR ( $\text{CDCl}_3$ , 150 MHz):  $\delta$  162.1, 161.9, 154.6, 136.6, 131.2, 128.4, 113.5, 112.5, 100.6, 55.9, 38.2, 32.4, 26.8, 26.4; IR (KBr,  $\text{cm}^{-1}$ ): 2959, 2924, 2850, 1701, 1652, 1628, 1593, 1572, 1464, 1433, 1403, 1297, 1265, 1158, 1138, 1034, 964, 937, 774; HRMS (ESI) calcd for  $\text{C}_{16}\text{H}_{18}\text{O}_3$  ( $\text{M} + \text{H}^+$ ) 259.1335, found 259.1327.

### 3-Cyclohexyl-8-ethoxy-2H-chromen-2-one (3a):

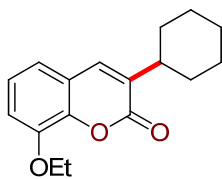

Semi-solid;  $^1\text{H}$  NMR ( $\text{CDCl}_3$ , 600 MHz):  $\delta$  7.41 (s, 1H), 7.14 (t, 1H,  $J = 8.4$  Hz), 6.99 (d, 2H,  $J = 7.2$  Hz), 4.19–4.16 (q, 2H,  $J = 7.2$  Hz), 2.81–2.76 (m, 1H), 1.97 (d, 2H,  $J = 12.6$  Hz), 1.86–1.82 (m, 2H), 1.78–1.76 (m, 1H), 1.48 (t, 3H,  $J = 10.0$  Hz), 1.46–1.41 (m,



2H), 1.32–1.23 (m, 3H);  $^{13}\text{C}$  NMR ( $\text{CDCl}_3$ , 150 MHz):  $\delta$  161.3, 146.5, 142.8, 136.6, 135.3, 124.2, 120.7, 118.9, 113.9, 65.1, 38.3, 32.3, 26.7, 26.4, 14.9; IR (KBr,  $\text{cm}^{-1}$ ): 2977, 2926, 2852, 1719, 1608, 1579, 1471, 1449, 1392, 1355, 1276, 1181, 1114, 1098, 1064, 1044, 982, 770, 731; HRMS (ESI) calcd for  $\text{C}_{17}\text{H}_{20}\text{O}_3$  ( $\text{M} + \text{H}^+$ ) 273.1492, found 273.1485.

### 6,8-Di-*tert*-butyl-3-cyclohexyl-2*H*-chromen-2-one (4a):

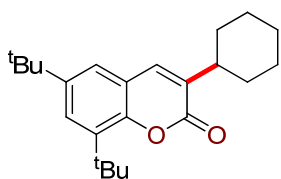

Semi-solid;  $^1\text{H}$  NMR ( $\text{CDCl}_3$ , 600 MHz):  $\delta$  7.49 (d, 1H,  $J = 2.4$  Hz), 7.43 (s, 1H), 7.26 (s, 1H), 2.79–2.76 (m, 1H), 1.97 (d, 2H,  $J = 12.0$  Hz), 1.86–1.83 (m, 2H), 1.78–1.76 (m, 1H), 1.51 (s, 9H), 1.46–1.42 (m, 3H), 1.35 (s, 9H), 1.33–1.29 (m, 2H);  $^{13}\text{C}$  NMR ( $\text{CDCl}_3$ , 150 MHz):  $\delta$  161.6, 149.6, 146.5, 137.8, 137.0, 133.8, 125.8, 122.2, 119.7, 38.1, 35.2, 34.8, 32.4, 31.6, 30.1, 26.7, 26.4; IR (KBr,  $\text{cm}^{-1}$ ): 2961, 2929, 2853, 1711, 1586, 1477, 1445, 1393, 1363, 1243, 1217, 1170, 1135, 1068, 1032, 1004, 983, 939, 888, 783; HRMS (ESI) calcd for  $\text{C}_{23}\text{H}_{32}\text{O}_2$  ( $\text{M} + \text{H}^+$ ) 341.2482, found 341.2470.

### 3-Cyclohexyl-6-nitro-2*H*-chromen-2-one (5a):

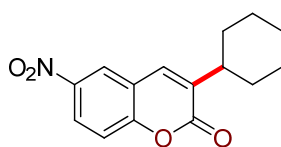

Semi-solid;  $^1\text{H}$  NMR ( $\text{CDCl}_3$ , 600 MHz):  $\delta$  8.39 (d, 1H,  $J = 2.4$  Hz), 8.33 (d, 1H,  $J = 9.6$  Hz), 7.51 (s, 1H), 7.42 (d, 1H,  $J = 9.0$  Hz), 2.82–2.77 (m, 1H), 1.99 (d, 2H,  $J = 12.0, 4.2$  Hz), 1.88 (dt, 2H,  $J = 13.2, 3.0$  Hz), 1.80 (d, 1H,  $J = 13.2$  Hz), 1.49–1.42 (m, 2H), 1.35–1.27 (m, 3H);  $^{13}\text{C}$  NMR ( $\text{CDCl}_3$ , 150 MHz):  $\delta$  160.1, 156.5, 144.2, 137.7, 135.2, 125.5, 123.4, 119.9, 117.6, 38.8, 32.2, 26.6, 26.2; IR (KBr,  $\text{cm}^{-1}$ ): 2927, 2855, 1728, 1652, 1632, 1617, 1529, 1486, 1342, 1270, 1169, 1090, 1060, 1041, 983, 935, 844, 836, 749, 668; HRMS (ESI) calcd for  $\text{C}_{15}\text{H}_{15}\text{NO}_4$  ( $\text{M} + \text{H}^+$ ) 274.1081, found 274.1074.

### 6,8-Dichloro-3-cyclohexyl-2H-chromen-2-one (6a):

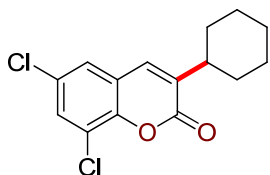

Semi-solid;  $^1\text{H}$  NMR ( $\text{CDCl}_3$ , 400 MHz):  $\delta$  7.50 (d, 1H,  $J = 2.4$  Hz), 7.35–7.34 (m, 2H), 2.81–2.75 (m, 1H), 1.98–1.95 (m, 2H), 1.88–1.77 (m, 3H), 1.50–1.39 (m, 2H), 1.33–1.19 (m, 3H);  $^{13}\text{C}$  NMR ( $\text{CDCl}_3$ , 150 MHz):  $\delta$  159.9, 147.3, 137.4, 134.9, 130.6, 129.4, 125.4, 122.3, 121.7, 38.6, 32.2, 26.6, 26.3; IR (KBr,  $\text{cm}^{-1}$ ): 2927, 2853, 1733, 1660, 1635, 1564, 1452, 1352, 1252, 1172, 1135, 1063, 992, 888, 859, 830, 778, 736; HRMS (ESI) calcd for  $\text{C}_{15}\text{H}_{14}\text{Cl}_2\text{O}_2$  ( $\text{M} + \text{H}^+$ ) 297.0450, found 297.0442.

### 3-Cyclohexyl-6-nitro-2H-chromen-2-one (7a):

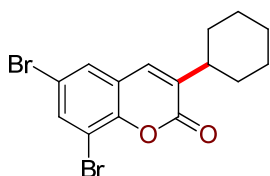

Semi-solid;  $^1\text{H}$  NMR ( $\text{CDCl}_3$ , 600 MHz):  $\delta$  7.79 (s, 1H), 7.53 (s, 1H), 7.31 (s, 1H), 2.80–2.76 (m, 1H), 1.96 (d, 2H,  $J = 12.0$  Hz), 1.86–1.84 (m, 2H), 1.79–1.76 (m, 1H), 1.45–1.41 (m, 2H), 1.35–1.27 (m, 3H);  $^{13}\text{C}$  NMR ( $\text{CDCl}_3$ , 150 MHz):  $\delta$  160.0, 148.9, 137.3, 136.1, 134.8, 129.1, 122.2, 116.8, 111.0, 38.6, 32.2, 26.6, 26.3; IR (KBr,  $\text{cm}^{-1}$ ): 2964, 2922, 2846, 1735, 1658, 1641, 1635, 1448, 1260, 1020, 796; HRMS (ESI) calcd for  $\text{C}_{15}\text{H}_{14}\text{Br}_2\text{O}_2$  ( $\text{M} + \text{H}^+$ ) 384.9433, found 384.9424.

### 2-Cyclohexyl-3H-benzo[*f*]chromen-3-one (8a):

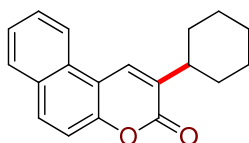

Semi-solid;  $^1\text{H}$  NMR ( $\text{CDCl}_3$ , 600 MHz):  $\delta$  8.28 (d, 1H,  $J = 8.4$  Hz), 8.24 (s, 1H), 7.91 (t, 2H,  $J = 8.4$  Hz), 7.67 (t, 1H,  $J = 7.8$  Hz), 7.55 (t, 1H,  $J = 7.8$  Hz), 7.45 (d, 1H,  $J = 9.0$  Hz), 2.88–2.86 (m, 1H), 2.06 (d, 2H,  $J = 12.0$  Hz), 1.91–1.89 (m, 2H), 1.81 (d, 1H,  $J = 13.2$  Hz), 1.51–1.42 (m, 4H), 1.34–1.27 (m, 1H);  $^{13}\text{C}$  NMR ( $\text{CDCl}_3$ , 150 MHz):  $\delta$  161.8, 152.2, 134.3, 132.2, 131.8, 130.5, 129.2, 128.0, 125.9, 121.7, 116.9, 113.8, 38.8, 32.5, 26.8, 26.4; IR (KBr,  $\text{cm}^{-1}$ ): 3066, 2921, 2849, 1705, 1635, 1591, 1517, 1448, 1438, 1236, 1213, 1171, 1135, 1088, 1075, 1044, 986, 882, 813,

782, 738; HRMS (ESI) calcd for C<sub>19</sub>H<sub>18</sub>O<sub>2</sub> (M + H<sup>+</sup>) 279.1386, found 279.1389

### 3-Cyclopentyl-2*H*-chromen-2-one (1b):

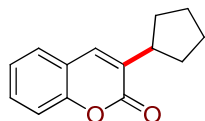

Semi-solid; <sup>1</sup>H NMR (CDCl<sub>3</sub>, 400 MHz): δ 7.50 (s, 1H), 7.45 (m, 2H), 7.31 (m, 1H), 7.26–7.23 (m, 1H), 3.20–3.11 (m, 1H), 2.14–2.06 (m, 2H), 1.85–1.76 (m, 4H), 1.73–1.53 (m, 2H); <sup>13</sup>C NMR (CDCl<sub>3</sub>, 150 MHz): δ 161.9, 153.1, 136.2, 133.7, 130.6, 127.4, 124.4, 119.8, 116.5, 40.9, 31.9, 25.3; IR (KBr, cm<sup>-1</sup>): 2955, 2872, 1722, 1630, 1609, 1454, 1276, 1224, 1173, 1121, 1057, 1022, 948, 922, 755; HRMS (ESI) calcd for C<sub>14</sub>H<sub>14</sub>O<sub>2</sub> (M + H<sup>+</sup>) 215.1073, found 215.1064.

### 3-Cyclooctyl-2*H*-chromen-2-one (1c):

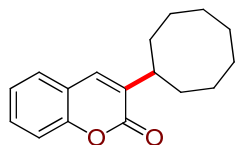

Crystalline needles; m.p. 85-86 °C; <sup>1</sup>H NMR (CDCl<sub>3</sub>, 600 MHz): δ 7.46 (s, 1H), 7.44 (d, 2H, *J* = 6.0 Hz), 7.29 (d, 1H, *J* = 8.4 Hz), 7.24 (t, 1H, *J* = 7.5 Hz), 3.10–3.03 (m, 1H), 1.84–1.82 (m, 2H), 1.80–1.73 (m, 4H), 1.72–1.64 (m, 8H); <sup>13</sup>C NMR (CDCl<sub>3</sub>, 150 MHz): δ 161.7, 152.9, 139.8, 136.5, 130.5, 127.4, 124.3, 119.8, 116.4, 38.2, 31.8, 26.9, 26.4, 25.8; IR (KBr, cm<sup>-1</sup>): 3057, 2963, 2922, 2856, 1717, 1627, 1608, 1489, 1473, 1462, 1454, 1388, 1360, 1281, 1274, 1258, 1230, 1182, 1274, 1258, 1230, 1181, 1174, 1146, 1124, 1058, 1011, 1027, 1000, 971, 956, 932, 923, 872, 853, 830, 777, 754, 733; HRMS (ESI) calcd for C<sub>17</sub>H<sub>20</sub>O<sub>2</sub> (M + H<sup>+</sup>) 257.1543, found 257.1539.

### 3-Benzyl-2*H*-chromen-2-one (1d):

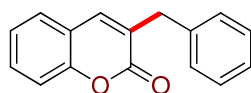

Semi-solid; <sup>1</sup>H NMR (CDCl<sub>3</sub>, 600 MHz): δ 7.44 (t, 1H, *J* = 7.2 Hz), 7.34–7.31 (m, 2H), 7.29–7.24 (m, 5H), 7.19 (t, 2H, *J* = 7.2 Hz), 3.86 (s, 2H); <sup>13</sup>C NMR (CDCl<sub>3</sub>, 150 MHz): δ 161.9, 153.3, 139.5, 137.8, 130.9, 130.0, 129.6, 128.9, 127.6, 127.0, 124.5,

119.6, 116.6, 36.8; IR (KBr,  $\text{cm}^{-1}$ ): 3022, 2988, 2917, 2841, 1712, 1631, 1608, 1489, 1455, 1434, 1387, 1224, 147, 1123, 1075, 1051, 1028, 956, 930, 825, 753, 731, 726, 700; HRMS (ESI) calcd for  $\text{C}_{16}\text{H}_{12}\text{O}_2$  ( $\text{M} + \text{H}^+$ ) 237.0917, found 237.0920.

### 3-(4-Methylbenzyl)-2H-chromen-2-one (1e):

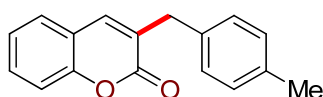

Semi-solid;  $^1\text{H}$  NMR ( $\text{CDCl}_3$ , 400 MHz):  $\delta$  7.44 (t, 1H,  $J = 7.4$  Hz), 7.35–7.29 (m, 2H), 7.25–7.23 (m, 1H), 7.21–7.14 (m, 5H), 3.82 (s, 2H), 2.34 (s, 3H);  $^{13}\text{C}$  NMR ( $\text{CDCl}_3$ , 100 MHz):  $\delta$  161.2, 153.2, 139.3, 136.6, 134.7, 130.9, 129.9, 129.7, 129.5, 127.6, 124.4, 119.7, 116.6, 36.3, 21.3; IR (KBr,  $\text{cm}^{-1}$ ): 2956, 2923, 2846, 1709, 1631, 1608, 1533, 1513, 1487, 1455, 1388, 1287, 1230, 1125, 1050, 956, 786, 752, 722; HRMS (ESI) calcd for  $\text{C}_{17}\text{H}_{14}\text{O}_2$  ( $\text{M} + \text{H}^+$ ) 251.1073, found 251.1086.

### 3-(3,5-Dimethylbenzyl)-2H-chromen-2-one (1f):

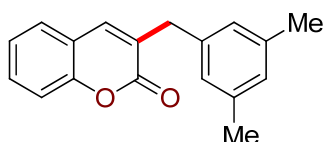

Semi-solid;  $^1\text{H}$  NMR ( $\text{CDCl}_3$ , 400 MHz):  $\delta$  7.39 (t, 1H,  $J = 7.4$  Hz), 7.30 (d, 1H,  $J = 7.6$  Hz), 7.25–7.19 (m, 2H), 7.15 (t, 1H,  $J = 7.2$  Hz), 6.83 (s, 3H), 3.75 (s, 2H), 2.24 (s, 6H);  $^{13}\text{C}$  NMR ( $\text{CDCl}_3$ , 150 MHz):  $\delta$  161.9, 153.3, 139.4, 138.5, 137.7, 130.9, 129.8, 128.7, 127.6, 127.4, 124.4, 119.7, 116.6, 36.5, 21.5; IR (KBr,  $\text{cm}^{-1}$ ): 3043, 3014, 2995, 2919, 2849, 1714, 1632, 1606, 487, 1456, 1429, 1386, 1257, 1232, 1196, 1163, 1124, 1055, 958, 923, 854, 837, 753, 704; HRMS (ESI) calcd for  $\text{C}_{18}\text{H}_{16}\text{O}_2$  ( $\text{M} + \text{H}^+$ ) 265.1229, found 265.1220.

### 3-Acetyl-3-(tert-butylperoxy)-4-cyclohexylchroman-2-one (1a'):

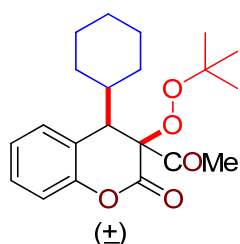

Solid; m.p. 180–181  $^{\circ}\text{C}$ ;  $^1\text{H}$  NMR ( $\text{CDCl}_3$ , 400 MHz):  $\delta$  7.24–7.19 (m, 1H), 7.06–6.99 (m, 2H), 6.96 (d, 1H,  $J = 8.0$  Hz), 2.90 (d, 1H,  $J = 4.2$  Hz), 2.40 (s, 3H), 1.69–1.44 (m, 6H), 1.24–1.04 (m, 3H), 0.94 (s, 9H), 0.84–0.73 (m, 1H), 0.56–0.46 (m, 1H);  $^{13}\text{C}$  NMR

(CDCl<sub>3</sub>, 150 MHz):  $\delta$  203.4, 161.2, 151.1, 130.2, 128.6, 123.9, 121.1, 116.3, 86.0, 82.3, 48.9, 38.4, 32.3, 27.1, 26.9, 26.7, 26.2, 25.9, 25.8; IR (KBr, cm<sup>-1</sup>): 2990, 2972, 2935, 2952, 1770, 1714, 1611, 1587, 1499, 1462, 1442, 1420, 1390, 1380, 1365, 1352, 1301, 1260, 1247, 1198, 1174, 1124, 1068, 1015, 918, 876, 776, 768; HRMS (ESI) calcd for C<sub>21</sub>H<sub>28</sub>O<sub>5</sub> (M + Na<sup>+</sup>) 383.1834, found 383.1842.

### 3-Acetyl-3-(*tert*-butylperoxy)-6-chloro-4-cyclohexylchroman-2-one (13a')

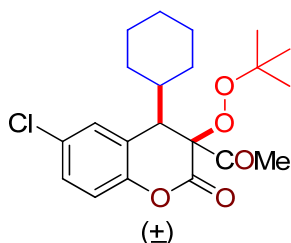

Solid; m.p. 168-170 °C; <sup>1</sup>H NMR (CDCl<sub>3</sub>, 400 MHz):  $\delta$  7.22–7.18 (m, 1H), 7.00 (d, 1H, *J* = 2.4 Hz), 6.91 (d, 1H, *J* = 8.8 Hz), 2.87 (d, 1H, *J* = 2.8 Hz), 2.40 (s, 3H), 1.66–1.63 (m, 2H), 1.54–1.47 (m, 4H), 1.22–1.04 (m, 3H), 0.96 (s, 9H), 0.92–0.78 (m, 1H), 0.55–0.45 (m, 1H); <sup>13</sup>C NMR (CDCl<sub>3</sub>, 100 MHz):  $\delta$  203.0, 160.5, 149.7, 129.8, 128.9, 128.6, 122.8, 117.5, 85.5, 82.5, 48.7, 38.2, 32.2, 27.0, 26.8, 26.5, 26.2, 25.8, 25.7; IR (KBr, cm<sup>-1</sup>): 2984, 2942, 2921, 2853, 1790, 1725, 1482, 1455, 1415, 1367, 1351, 1273, 1260, 1226, 1217, 1194, 1180, 1148, 1120, 1094, 1083, 1066, 1041, 1034, 930, 911, 896, 891, 882, 870, 848, 812, 787, 759, 745, 707; HRMS (ESI) calcd for C<sub>21</sub>H<sub>27</sub>ClO<sub>5</sub> (M + Na<sup>+</sup>) 417.1445, found 417.1436.

### 3-Acetyl-6-bromo-3-(*tert*-butylperoxy)-4-cyclohexylchroman-2-one (14a')

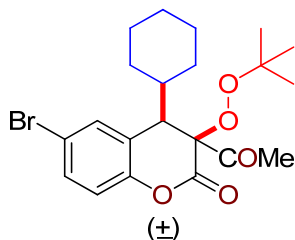

Solid; m.p. 155-158 °C; <sup>1</sup>H NMR (CDCl<sub>3</sub>, 400 MHz):  $\delta$  7.40 (dd, 1H, *J*<sub>1</sub> = 8.0 Hz, *J*<sub>2</sub> = 2.4 Hz), 7.21 (d, 1H, *J* = 2.4 Hz), 6.92 (d, 1H, *J* = Hz), 2.93 (d, 1H, *J* = 2.8 Hz), 2.46 (s, 3H), 1.73–1.69 (m, 2H), 1.61–1.53 (m, 4H), 1.25–1.11 (m, 3H), 1.02 (s, 9H), 0.91–0.86 (m, 1H), 0.58–0.55 (m, 1H); <sup>13</sup>C NMR (CDCl<sub>3</sub>, 150 MHz):  $\delta$  202.2, 160.6, 150.3, 132.7, 131.7, 131.2, 123.4, 118.9, 117.9, 85.6, 82.6, 48.7, 38.3, 32.3, 27.1, 26.9, 26.6, 26.3, 25.9, 25.7; IR (KBr, cm<sup>-1</sup>): 2940, 2926, 2850, 1791, 1700, 1697, 1681, 1650, 1633, 1560,

1478, 1450, 1412, 1389, 1364, 1260, 1245, 1224, 1175, 1153, 1092, 1026, 912, 891, 873, 858, 810, 775; HRMS (ESI) calcd for  $C_{21}H_{27}BrO_5$  ( $M + Na^+$ ) 461.0940, found 461.0932.

### 3-Acetyl-3-(*tert*-butylperoxy)-4-cyclohexyl-6-nitrochroman-2-one (5a')

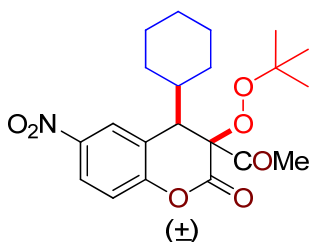

Semi-solid;  $^1H$  NMR ( $CDCl_3$ , 400 MHz):  $\delta$  8.19 (dd, 1H,  $J_1 = 8.8$  Hz,  $J_2 = 2.4$  Hz), 7.99 (d, 1H,  $J = 2.8$  Hz), 7.15 (d, 1H,  $J = 8.8$  Hz), 3.07 (d, 1H,  $J = 2.8$  Hz), 2.47 (s, 3H), 1.71–1.51 (m, 6H), 1.27–1.05 (m, 3H), 0.99 (s, 9H), 0.88–0.79 (m, 1H), 0.54–0.44 (m, 1H);  $^{13}C$  NMR ( $CDCl_3$ , 100 MHz):  $\delta$  202.4, 159.6, 155.5, 143.8, 125.7, 124.7, 122.6, 117.1, 85.2, 82.8, 48.8, 38.2, 32.1, 27.0, 26.9, 26.4, 26.2, 25.8, 25.6; IR (KBr,  $cm^{-1}$ ): 3092, 2984, 2924, 2850, 1798, 1720, 1627, 1586, 1559, 1525, 1483, 1450, 1433, 1392, 1367, 1341, 1308, 1260, 1233, 1219, 1184, 1150, 1112, 1087, 1066, 1044, 1029, 1010, 967, 939, 915, 902, 868, 841, 812, 777, 753, 752, 740; HRMS (ESI) calcd for  $C_{21}H_{27}NO_7$  ( $M + Na^+$ ) 428.1685, found 428.1676.

### 3-Acetyl-3-(*tert*-butylperoxy)-6,8-dichloro-4-cyclohexylchroman-2-one (6a')

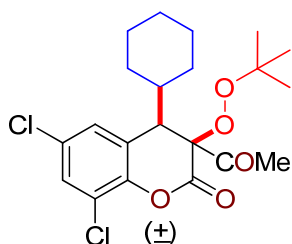

Semi-solid;  $^1H$  NMR ( $CDCl_3$ , 400 MHz):  $\delta$  7.38 (s, 1H), 6.98 (s, 1H), 2.95 (d, 1H,  $J = 2.4$  Hz), 2.47 (s, 3H), 1.73–1.70 (m, 2H), 1.63–1.55 (m, 4H), 1.25–1.12 (m, 3H), 1.04 (s, 9H), 0.95–0.88 (m, 1H), 0.62–0.54 (m, 1H);  $^{13}C$  NMR ( $CDCl_3$ , 100 MHz):  $\delta$  202.5, 159.4, 145.7, 129.0, 128.8, 128.2, 124.3, 122.1, 85.2, 82.6, 49.0, 38.0, 32.2, 27.0, 26.9, 26.4, 26.0, 25.7, 25.6; IR (KBr,  $cm^{-1}$ ): 3084, 2979, 2928, 2852, 1795, 1721, 1460, 1420, 1363, 1262, 1249, 1212, 1182, 1154, 1123, 1100, 1070, 1044, 1014, 973, 937, 917, 900, 881, 870, 855, 825, 786, 754, 746; HRMS (ESI) calcd for  $C_{21}H_{26}Cl_2O_5$  ( $M + Na^+$ ) 451.1055, found 451.1049.

### 3-Acetyl-6,8-dibromo-3-(*tert*-butylperoxy)-4-cyclohexylchroman-2-one (7a')

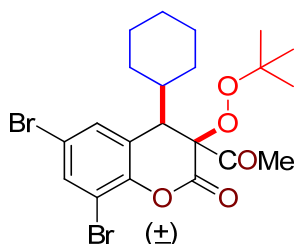

Semi-solid;  $^1\text{H}$  NMR ( $\text{CDCl}_3$ , 400 MHz):  $\delta$  7.64 (d, 1H,  $J = 2.4$  Hz), 7.13 (d, 1H,  $J = 2.0$  Hz), 2.90 (d, 1H,  $J = 3.2$  Hz), 2.44 (s, 3H), 1.70–1.48 (m, 6H), 1.24–1.09 (m, 3H), 1.01 (s, 9H), 0.92–0.86 (m, 1H), 0.55–0.51 (m, 1H);  $^{13}\text{C}$  NMR ( $\text{CDCl}_3$ , 100 MHz):  $\delta$  202.6, 159.5, 147.4, 134.7, 131.7, 124.7, 116.4, 111.0, 85.3, 82.7, 49.2, 38.1, 32.3, 27.2, 27.1, 26.8, 26.5, 26.2, 25.8, 25.6; IR (KBr,  $\text{cm}^{-1}$ ): 2960, 2926, 2856, 1800, 1725, 1683, 1643, 1565, 1560, 1449, 1413, 1365, 1254, 1190, 1148, 1095, 1026, 931, 865, 800; HRMS (ESI) calcd for  $\text{C}_{21}\text{H}_{26}\text{Br}_2\text{O}_5$  ( $\text{M} + \text{Na}^+$ ) 539.0039, found 539.0027.

### 3-Acetyl-3-(*tert*-butylperoxy)-4-cyclohexyl-7-methoxychroman-2-one (2a')

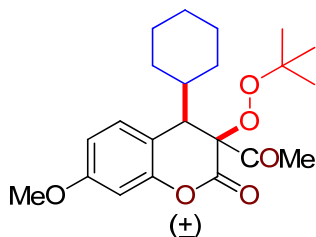

Semi-solid;  $^1\text{H}$  NMR ( $\text{CDCl}_3$ , 600 MHz):  $\delta$  6.94 (d, 1H,  $J = 8.4$  Hz), 6.64 (dd, 1H,  $J_1 = 9.0$  Hz,  $J_2 = 3.0$  Hz), 6.56 (d, 1H,  $J = 2.4$  Hz), 3.78 (s, 3H), 2.89 (d, 1H,  $J = 3.0$  Hz), 2.42 (s, 3H), 1.70–1.64 (m, 2H), 1.58–1.47 (m, 4H), 1.24–1.10 (m, 3H), 1.00 (s, 9H), 0.86–0.84 (m, 1H), 0.57–0.56 (m, 1H);  $^{13}\text{C}$  NMR ( $\text{CDCl}_3$ , 150 MHz):  $\delta$  203.4, 161.2, 159.9, 151.9, 130.7, 112.9, 109.9, 101.9, 86.1, 82.3, 55.7, 48.3, 38.5, 32.3, 27.0, 26.8, 26.6, 26.3, 25.9, 25.8; IR (KBr,  $\text{cm}^{-1}$ ): 2990, 2970, 2928, 2850, 1776, 1722, 1624, 1585, 1559, 1507, 1453, 1432, 1364, 1321, 1285, 1277, 1238, 1210, 1189, 1156, 1124, 1090, 1045, 1030, 922, 902, 886, 870, 859, 838, 806, 792, 763, 747, 712; HRMS (ESI) calcd for  $\text{C}_{22}\text{H}_{30}\text{O}_6$  ( $\text{M} + \text{Na}^+$ ) 413.1940, found 413.1944.

### 3-Acetyl-3-(*tert*-butylperoxy)-4-cyclohexyl-8-methoxychroman-2-one (15a')

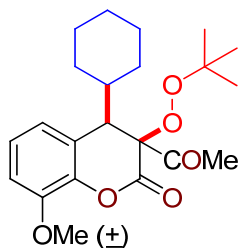

Semi-solid;  $^1\text{H}$  NMR ( $\text{CDCl}_3$ , 600 MHz):  $\delta$  7.00 (d, 1H,  $J = 7.8$  Hz), 6.85 (d, 1H,  $J = 7.8$  Hz), 6.61 (d, 1H,  $J = 7.2$  Hz), 3.83 (s, 3H), 2.92 (d, 1H,  $J = 3.0$  Hz), 2.42 (s, 3H), 1.71–1.47 (m, 6H), 1.23–1.08 (m, 3H), 0.96 (s, 9H), 0.86–0.80 (m, 1H), 0.63–0.58 (m,

1H);  $^{13}\text{C}$  NMR ( $\text{CDCl}_3$ , 150 MHz):  $\delta$  203.5, 160.6, 147.1, 140.4, 123.7, 122.2, 121.7, 111.4, 85.8, 82.2, 56.2, 48.9, 38.2, 32.4, 27.2, 27.0, 26.6, 26.0, 25.9, 25.8; IR (KBr,  $\text{cm}^{-1}$ ): 2982, 2930, 2856, 1780, 1724, 1620, 1590, 1554, 1504, 1485, 1460, 1366, 1320, 1304, 1273, 1250, 1182, 1160, 1107, 1062, 1016, 971, 913, 866, 804, 785, 732; HRMS (ESI) calcd for  $\text{C}_{22}\text{H}_{30}\text{O}_6$  ( $\text{M} + \text{Na}^+$ ) 413.1940, found 413.1931.

**2-Acetyl-2-(*tert*-butylperoxy)-1-cyclohexyl-1H-benzof[*f*]chromen-3(2H)-one (8a'):**

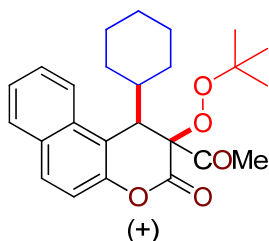

Solid; m.p. 156-160  $^{\circ}\text{C}$ ;  $^1\text{H}$  NMR ( $\text{CDCl}_3$ , 400 MHz):  $\delta$  7.90 (d, 1H,  $J = 8.8$  Hz), 7.86 (d, 1H,  $J = 8.0$  Hz), 7.78 (d, 1H,  $J = 8.8$  Hz), 7.56 (d, 1H,  $J = 7.2$  Hz), 7.47 (t, 1H,  $J = 7.0$  Hz), 7.22 (t, 1H,  $J = 9.2$  Hz), 3.77 (d, 1H,  $J = 3.6$  Hz), 2.56 (s, 3H), 1.86–1.43 (m, 6H), 1.20–1.06 (m, 3H), 0.90 (s, 9H), 0.85–0.81 (m, 1H), 0.77–0.68 (m, 1H);  $^{13}\text{C}$  NMR ( $\text{CDCl}_3$ , 100 MHz):  $\delta$  203.6, 161.3, 148.7, 132.2, 131.2, 129.4, 129.1, 127.1, 125.0, 123.8, 116.7, 116.1, 85.5, 82.3, 44.3, 39.1, 33.3, 28.5, 27.4, 26.8, 26.4, 26.1, 25.6; IR (KBr,  $\text{cm}^{-1}$ ): 2942, 2927, 2850, 1780, 1745, 1720, 1628, 1602, 1558, 1516, 1507, 1463, 1438, 1395, 1367, 1264, 1220, 1186, 1162, 1115, 1080, 1063, 1045, 1028, 975, 864, 820, 789, 752; HRMS (ESI) calcd for  $\text{C}_{25}\text{H}_{30}\text{O}_5$  ( $\text{M} + \text{Na}^+$ ) 433.1991, found 433.1998.

**3-Acetyl-3-(*tert*-butylperoxy)-4-cyclopentylchroman-2-one (1b'):**

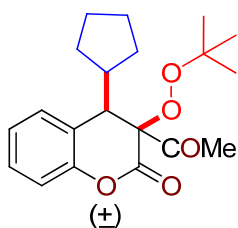

Solid; m.p. 160-162  $^{\circ}\text{C}$ ;  $^1\text{H}$  NMR ( $\text{CDCl}_3$ , 400 MHz):  $\delta$  7.24–7.19 (m, 1H), 7.07–7.01 (m, 2H), 6.96 (d, 1H,  $J = 8.0$  Hz), 3.20 (d, 1H,  $J = 4.0$  Hz), 2.41 (s, 3H), 1.87–1.79 (m, 1H), 1.63–1.58 (m, 2H), 1.38–1.32 (m, 4H), 1.26–1.15 (m, 1H), 0.94 (s, 9H), 0.73–0.63 (m, 1H);  $^{13}\text{C}$  NMR ( $\text{CDCl}_3$ , 100 MHz):  $\delta$  203.3, 161.2, 151.2, 130.3, 128.6, 123.9, 121.7, 116.2, 86.5, 82.3, 45.6, 39.7, 31.1, 27.1, 26.5, 26.2, 24.3, 23.5; IR (KBr,  $\text{cm}^{-1}$ ): 2990, 2958, 2872, 1784, 1715, 1615, 1587, 1489, 1467, 1423, 1373, 1366, 1358, 1226, 1198,



1169, 1136, 1116, 1093, 1056, 1017, 986, 920, 904, 774, 755, 720; HRMS (ESI) calcd for  $C_{20}H_{26}O_5$  ( $M + Na^+$ ) 369.1678, found 369.1672.

**3-(*tert*-Butylperoxy)-4-cyclohexyl-3-propionylchroman-2-one (9a')**:

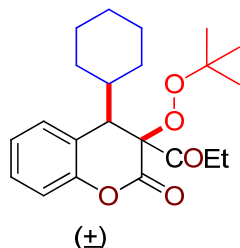

Solid; m.p. 162-164 °C;  $^1H$  NMR ( $CDCl_3$ , 400 MHz):  $\delta$  7.21 (t, 1H,  $J = 8.0$  Hz), 7.05–6.99 (m, 2H), 6.95 (d, 1H,  $J = 8.4$  Hz), 2.95–2.90 (m, 1H), 2.88 (d, 1H,  $J = 2.4$  Hz), 2.76–2.66 (m, 1H), 1.71–1.60 (m, 2H), 1.52–1.43 (m, 4H), 1.25–1.18 (m, 2H), 1.09 (t, 3H,  $J = 7.0$  Hz), 0.92 (s, 9H), 0.87–0.73 (m, 2H), 0.56–0.46 (m, 1H);  $^{13}C$  NMR ( $CDCl_3$ , 100 MHz):  $\delta$  205.9, 161.3, 151.1, 130.1, 128.5, 123.8, 121.2, 116.2, 86.2, 82.2, 49.2, 38.4, 32.2, 31.9, 26.9, 26.6, 26.2, 25.8, 25.7, 7.5; IR (KBr,  $cm^{-1}$ ): 2974, 2930, 2857, 1786, 1716, 1614, 1588, 1490, 1458, 1405, 1390, 1376, 1370, 1364, 1352, 1325, 1260, 1225, 1179, 1155, 1119, 1082, 1066, 1020, 965, 940, 907, 898, 875, 842, 788, 757, 749, 703; HRMS (ESI) calcd for  $C_{22}H_{30}O_5$  ( $M + Na^+$ ) 397.1991, found 397.1980.

**3-(*tert*-Butylperoxy)-4-cyclohexyl-3-pentanoylchroman-2-one (10a')**:

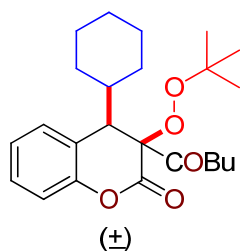

Solid; m.p. 132-136 °C;  $^1H$  NMR ( $CDCl_3$ , 400 MHz):  $\delta$  7.21 (t, 1H,  $J = 7.4$  Hz), 7.05–6.99 (m, 2H), 6.95 (d, 1H,  $J = 8.4$  Hz), 2.88 (s, 1H), 2.84–2.81 (m, 1H), 2.71–2.62 (m, 1H), 1.71–1.60 (m, 4H), 1.51–1.40 (m, 4H), 1.16–1.04 (m, 4H), 0.92 (s, 9H), 0.91–0.86 (m, 3H), 0.82–0.73 (m, 2H), 0.54–0.45 (m, 1H);  $^{13}C$  NMR ( $CDCl_3$ , 100 MHz):  $\delta$  205.3, 161.3, 151.1, 130.1, 128.5, 123.8, 121.1, 116.2, 86.0, 82.1, 49.1, 40.4, 38.3, 32.2, 26.8, 26.6, 26.2, 25.8, 25.7, 16.7, 13.9; IR (KBr,  $cm^{-1}$ ): 2980, 2927, 2850, 1787, 1721, 1615, 1586, 1490, 1464, 1366, 1260, 1227, 1182, 1158, 1148, 1112, 1084, 1021, 966, 948, 911, 898, 877, 790, 765, 704; HRMS (ESI) calcd for  $C_{24}H_{34}O_5$  ( $M + Na^+$ ) 425.2304, found 425.2310.

### 3-Benzoyl-3-(*tert*-butylperoxy)-4-cyclohexylchroman-2-one (11a')

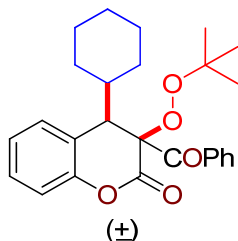

Solid; m.p. 158-160 °C;  $^1\text{H}$  NMR ( $\text{CDCl}_3$ , 400 MHz):  $\delta$  8.13 (d, 2H,  $J = 7.2$  Hz), 7.49 (t, 1H,  $J = 7.0$  Hz), 7.37 (t, 2H,  $J = 7.4$  Hz), 7.23–7.21 (m, 1H), 7.07–7.05 (m, 2H), 7.80 (d, 1H,  $J = 8.4$  Hz), 3.27 (s, 1H), 1.82–1.78 (m, 1H), 1.63–1.50 (m, 4H), 1.45–1.41 (m, 2H), 1.18–1.10 (m, 3H), 0.81 (s, 9H), 0.60–0.53 (m, 1H);  $^{13}\text{C}$  NMR ( $\text{CDCl}_3$ , 100 MHz):  $\delta$  194.2, 160.1, 151.2, 136.4, 132.9, 130.2, 129.5, 128.6, 128.2, 123.8, 120.9, 116.2, 87.8, 82.2, 50.6, 38.5, 32.3, 26.7, 26.5, 26.1, 25.9, 25.8; IR (KBr,  $\text{cm}^{-1}$ ): 2970, 2928, 2854, 1777, 1734, 1692, 1612, 1600, 1490, 1458, 1448, 1375, 1276, 1245, 1226, 1198, 1170, 1133, 1116, 1066, 1019, 952, 923, 880, 812, 770, 752; HRMS (ESI) calcd for  $\text{C}_{26}\text{H}_{30}\text{O}_5$  ( $\text{M} + \text{Na}^+$ ) 445.1991, found 445.1984.

### 3-(*tert*-Butylperoxy)-4-cyclohexyl-2-oxochroman-3-carbonitrile (12a')

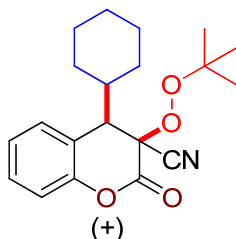

Solid; m.p. 154-156 °C;  $^1\text{H}$  NMR ( $\text{CDCl}_3$ , 400 MHz):  $\delta$  7.32 (t, 1H,  $J = 8.0$  Hz), 7.16 (t, 1H,  $J = 7.4$  Hz), 7.10–7.04 (m, 2H), 3.22 (d, 1H,  $J = 3.2$  Hz), 2.15–2.08 (m, 1H), 1.77–1.73 (m, 2H), 1.63–1.53 (m, 3H), 1.35–1.18 (m, 3H), 1.06 (s, 9H), 0.95–0.85 (m, 1H), 0.70–0.60 (m, 1H);  $^{13}\text{C}$  NMR ( $\text{CDCl}_3$ , 100 MHz):  $\delta$  159.5, 150.5, 130.2, 129.3, 124.8, 119.1, 116.5, 114.5, 83.3, 80.7, 50.1, 39.6, 32.1, 27.1, 26.4, 26.1, 25.8, 25.6; IR (KBr,  $\text{cm}^{-1}$ ): 2980, 2927, 2855, 2212, 1768, 1620, 1558, 1486, 1459, 1367, 1361, 1260, 1239, 1150, 1135, 1064, 1050, 1030, 1008, 910, 896, 856, 798, 767, 751, 704; HRMS (ESI) calcd for  $\text{C}_{20}\text{H}_{25}\text{NO}_4$  ( $\text{M} + \text{Na}^+$ ) 366.1681, found 366.1678.

### 1-(Cyclohexyloxy)-2,2,6,6-tetramethylpiperidine (1A)

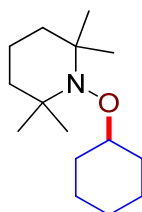

Gummy;  $^1\text{H}$  NMR ( $\text{CDCl}_3$ , 400 MHz):  $\delta$  3.58 (bs, 1H), 2.04 (bs, 2H), 1.74 (bs, 2H), 1.54–1.45 (m, 7H), 1.31–1.19 (m, 5H), 1.14 (s,

6H), 1.11 (s, 6H);  $^{13}\text{C}$  NMR ( $\text{CDCl}_3$ , 150 MHz):  $\delta$  81.9, 59.8, 40.5, 34.7, 33.1, 26.2, 25.3, 17.6; IR (KBr,  $\text{cm}^{-1}$ ): 2972, 2931, 2855, 1467, 1452, 1374, 1359, 1257, 1242, 1208, 1132, 1058, 1044, 1021, 966, 913, 785, 710; HRMS (ESI) calcd for  $\text{C}_{15}\text{H}_{29}\text{NO}$  ( $\text{M} + \text{H}^+$ ) 240.2329, found 240.2335.

**1-(Benzyloxy)-2,2,6,6-tetramethylpiperidine (1B):**

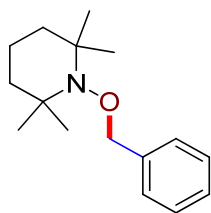

Gummy;  $^1\text{H}$  NMR ( $\text{CDCl}_3$ , 400 MHz):  $\delta$  7.38-7.25 (m, 5H), 4.82 (s, 2H), 1.58-1.48 (m, 5H), 1.37-1.33 (m, 1H), 1.26 (s, 6H), 1.15 (s, 6H);  $^{13}\text{C}$  NMR ( $\text{CDCl}_3$ , 150 MHz):  $\delta$  138.5, 128.4, 127.7, 127.5, 78.9, 60.2, 39.9, 33.3, 20.5, 17.3; IR (KBr,  $\text{cm}^{-1}$ ): 2973, 2929, 2871, 1496, 1469, 1452, 1373, 1359, 1262, 1243, 1207, 1183, 1133, 1081, 1045, 1028, 992, 955, 926, 732; HRMS (ESI) calcd for  $\text{C}_{16}\text{H}_{25}\text{NO}$  ( $\text{M} + \text{H}^+$ ) 248.2016, found 248.2011.

3-Cyclohexyl-2H-chromen-2-one (1a): <sup>1</sup>H NMR (CDCl<sub>3</sub>, 600 MHz)

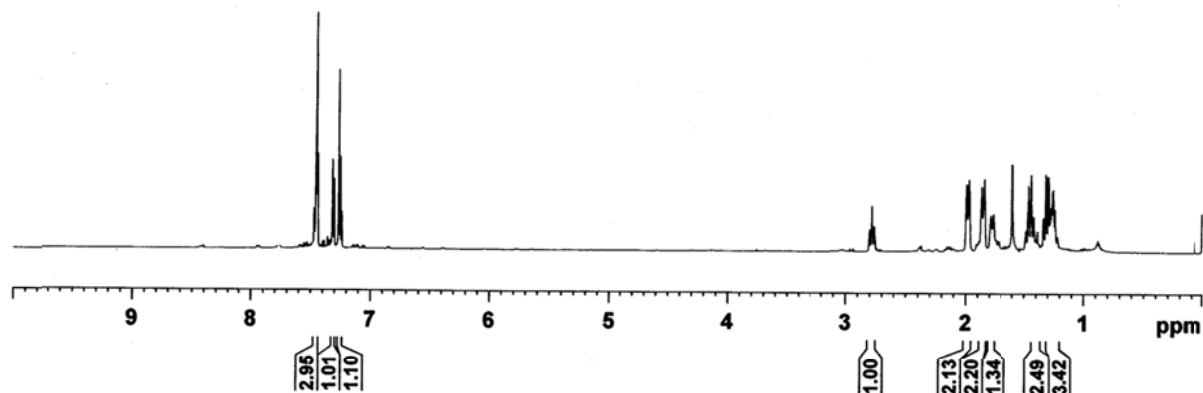

```
Current Data Parameters
NAME      AB-COMeCY_1H
EXPNO    1
PROCNO   1

F2 - Acquisition Parameters
Date_    20150521
Time     16.23
INSTRUM  spect
PROBHD   5 mm PABBO BB/
PULPROG  zg30
TD       32768
SOLVENT  CDCl3
NS       16
DS       2
SWH      12019.230 Hz
FIDRES   0.366798 Hz
AQ       1.3631488 sec
RG       113
DW       41.600 usec
DE       6.50 usec
TE       294.5 K
D1       1.00000000 sec
TDO      1

----- CHANNEL f1 -----
SFO1     600.1737063 MHz
NUC1      1H
P1       12.00 usec
PL1      21.00000000 W

F2 - Processing parameters
SI       16384
SF       600.1700114 MHz
WDW      EM
SSB      0
LB       0.30 Hz
GB       0
PC       1.00
```

3-Cyclohexyl-2*H*-chromen-2-one (1a): <sup>13</sup>C NMR (CDCl<sub>3</sub>, 150 MHz)

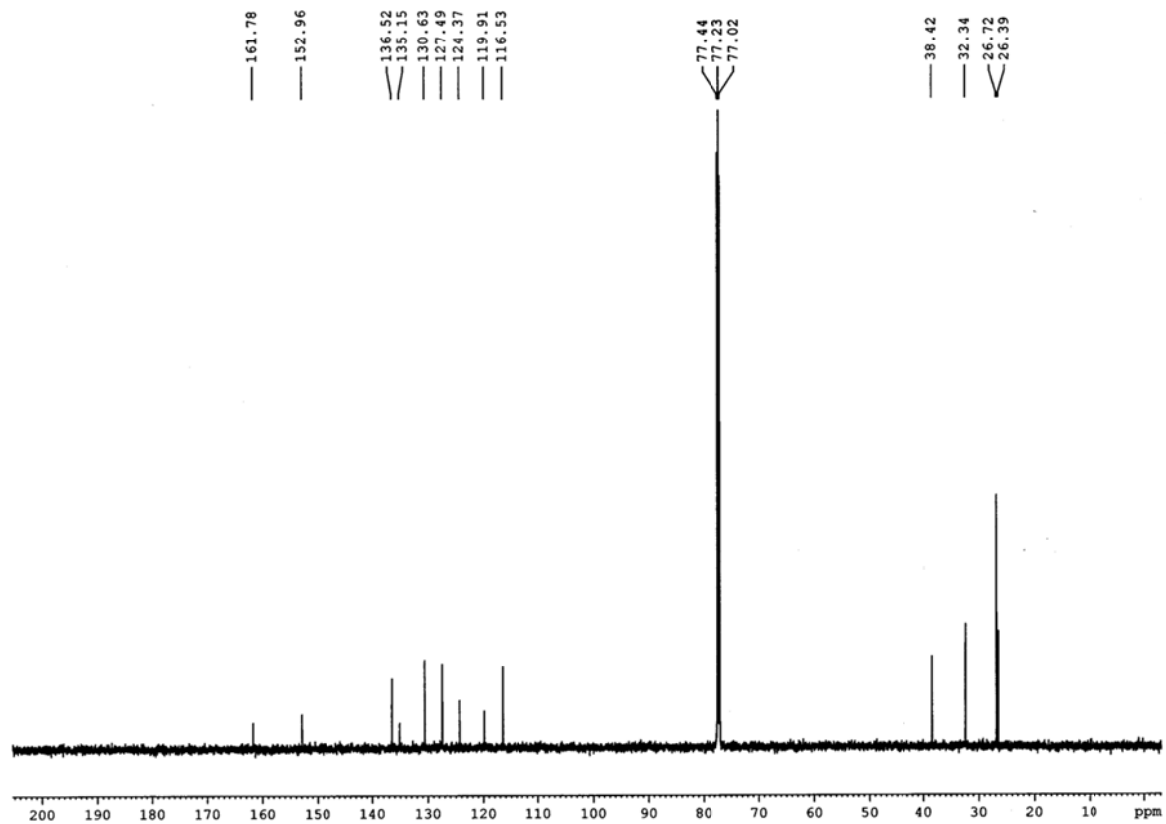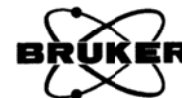

```

Current Data Parameters
NAME      AB-COMeDTF-13C
EXPNO     1
PROCNO    1

F2 - Acquisition Parameters
Date_     20150302
Time      10.28
INSTRUM   spect
PROBHD    5 mm PABBO BB/
PULPROG   zgpg30
TD         32768
SOLVENT   CDCl3
NS         201
DS         2
SWH        36057.691 Hz
FIDRES     1.100393 Hz
AQ         0.4543829 sec
RG         65.24
DW         13.867 usec
DE         6.50 usec
TE         298.4 K
D1         2.00000000 sec
D11        0.03000000 sec
TDO        1

----- CHANNEL f1 -----
SF01      150.9279571 MHz
NUC1       13C
P1         10.50 usec
PLW1       95.00000000 W

----- CHANNEL f2 -----
SF02      600.1724007 MHz
NUC2       1H
CPDPRG[2] waltz16
PCPD2     70.00 usec
PLM2      21.00000000 W
PLM12     0.61714000 W
PLM13     0.30239999 W

F2 - Processing parameters
SI         16384
SF         150.9128355 MHz
WDW        EM
SSB        0
LB         1.00 Hz
GB         0
PC         1.40
    
```

3-Cyclohexyl-7-methoxy-2H-chromen-2-one (2a): <sup>1</sup>H NMR (CDCl<sub>3</sub>, 600 MHz)

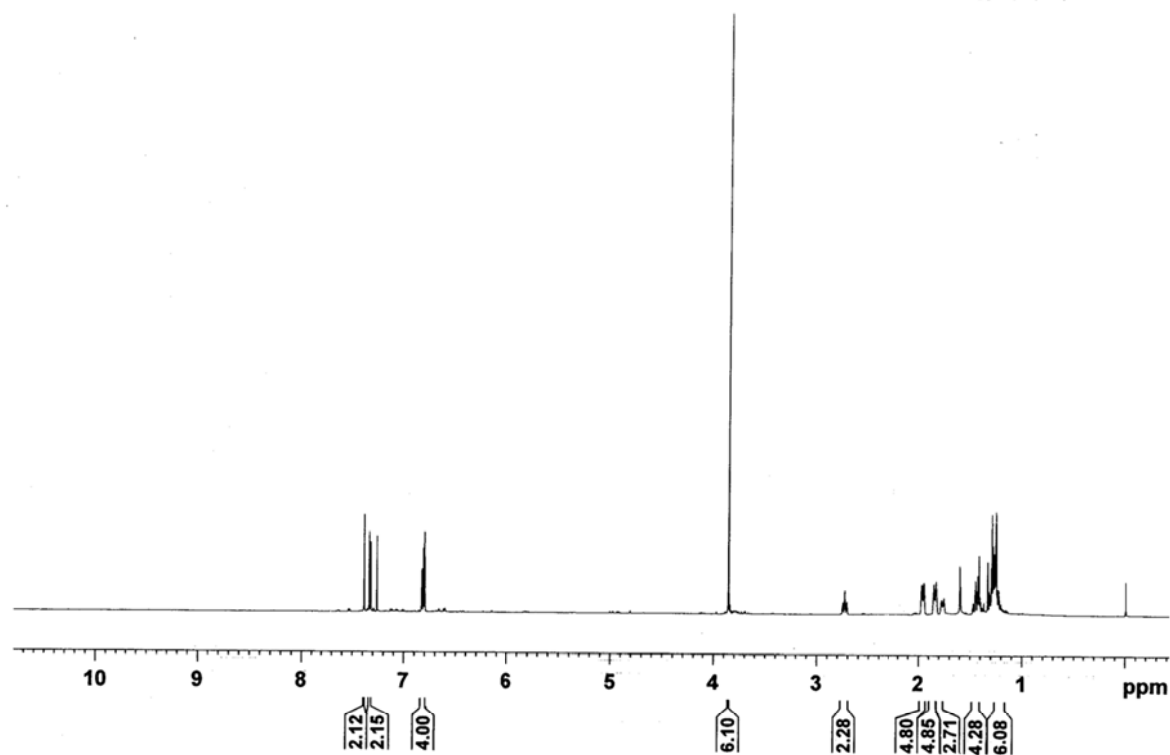

```
Current Data Parameters
NAME AB-70Me-COMe-1H
EXPNO 1
PROCNO 1

F2 - Acquisition Parameters
Date_ 20150216
Time 8.41
INSTRUM spect
PROBHD 5 mm PABBO BB/
PULPROG zg30
TD 32768
SOLVENT CDCl3
NS 16
DS 2
SWH 12019.230 Hz
FIDRES 0.366798 Hz
AQ 1.3631488 sec
RG 89.67
DW 41.600 usec
DE 6.50 usec
TE 296.6 K
D1 1.00000000 sec
TD0 1

----- CHANNEL f1 -----
SFO1 600.1737063 MHz
NUC1 1H
P1 12.00 usec
PL1 21.00000000 W

F2 - Processing parameters
SI 16384
SF 600.1700137 MHz
WDW EM
SSB 0
LB 0.30 Hz
GB 0
PC 1.00
```

3-Cyclohexyl-7-methoxy-2H-chromen-2-one (2a): <sup>13</sup>C NMR (CDCl<sub>3</sub>, 150 MHz)

AB-70MECOME-13C

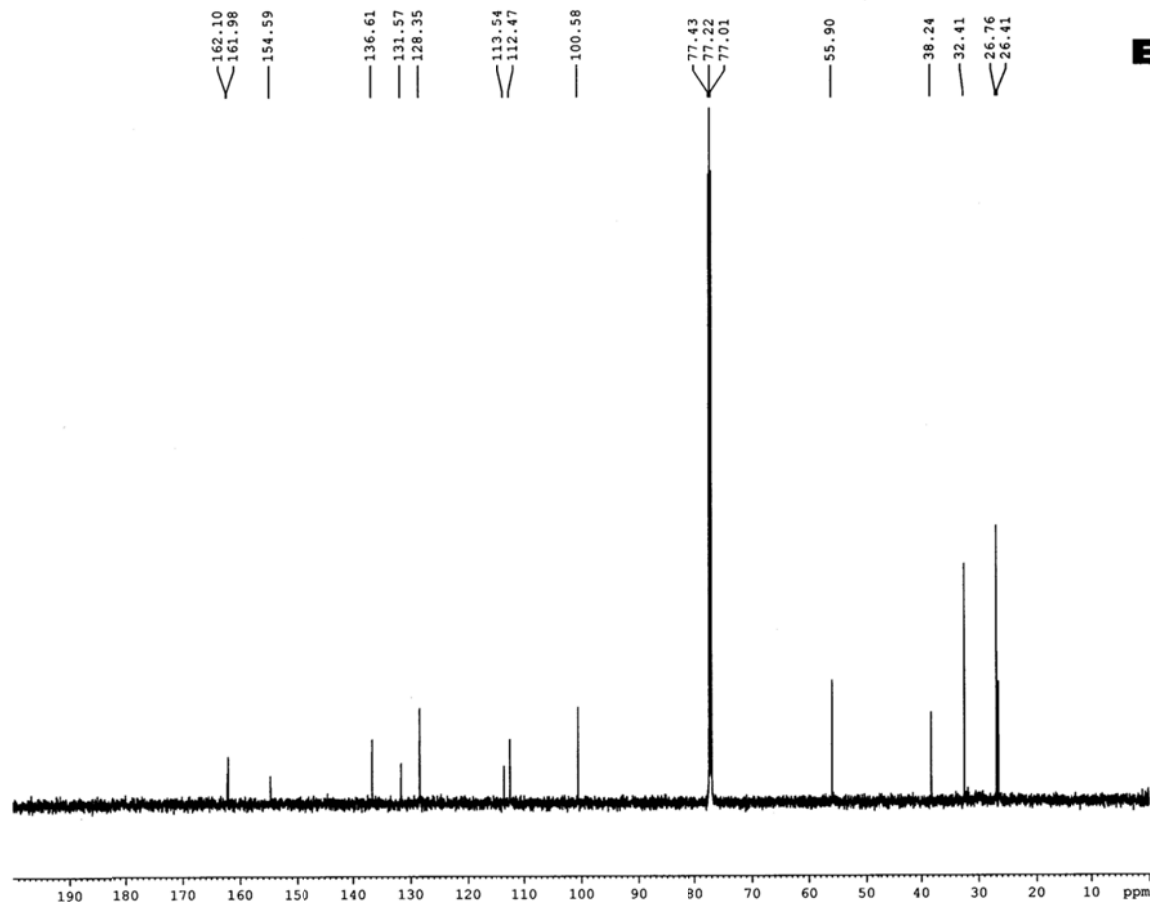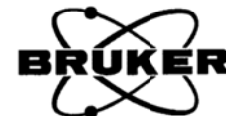

```

Current Data Parameters
NAME      AB-70MECOME-13C
EXPNO     1
PROCNO    1

F2 - Acquisition Parameters
Date_     20150320
Time      13:42
INSTRUM   spect
PROBHD    5 mm PABBO BB/
PULPROG   zgpg30
TD         32768
SOLVENT   CDCl3
NS         203
DS         2
SWH        36057.691 Hz
FIDRES     1.100393 Hz
AQ         0.4543829 sec
RG         65.24
DW         13.867 usec
DE         6.50 usec
TE         298.6 K
D1         2.0000000 sec
D11        0.03000000 sec
TDO        1

----- CHANNEL f1 -----
SFO1      150.9279571 MHz
NUC1       13C
P1         10.50 usec
PLW1       95.00000000 W

----- CHANNEL f2 -----
SFO2      600.1724007 MHz
NUC2       1H
CPDPRG[2] waltz16
PCPD2     70.00 usec
PLW2      21.00000000 W
PLW12     0.61714000 W
PLW13     0.30239999 W

F2 - Processing parameters
SI         16384
SF         150.9128360 MHz
WDW        EM
SSB        0
LB         1.00 Hz
GB         0
PC         1.40
    
```

3-Cyclohexyl-8-ethoxy-2*H*-chromen-2-one (3a): <sup>1</sup>H NMR (CDCl<sub>3</sub>, 600 MHz)

AB-8OEtCOMe-1H

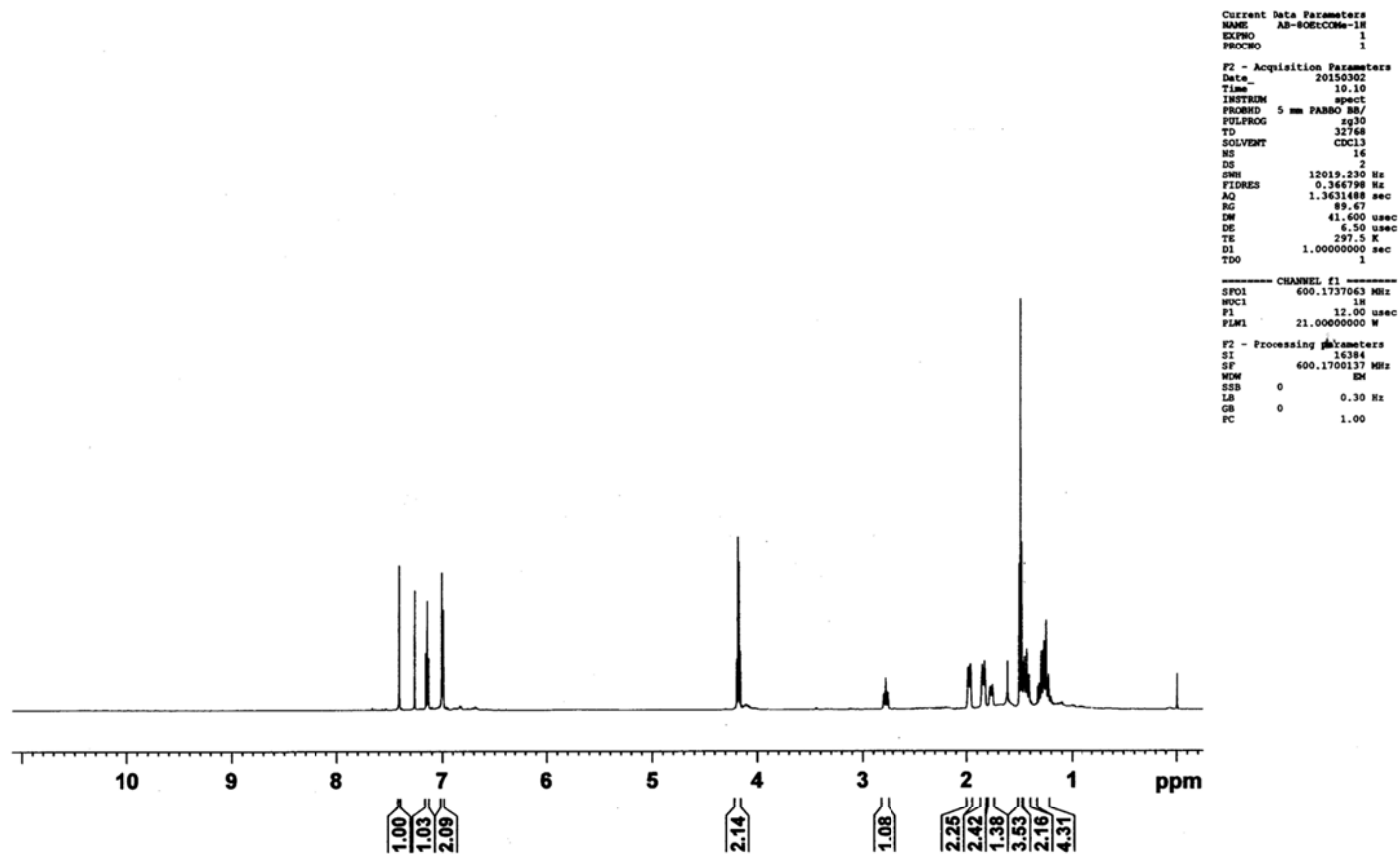



3-Cyclohexyl-8-ethoxy-2H-chromen-2-one (3a):  $^{13}\text{C}$  NMR ( $\text{CDCl}_3$ , 150 MHz)

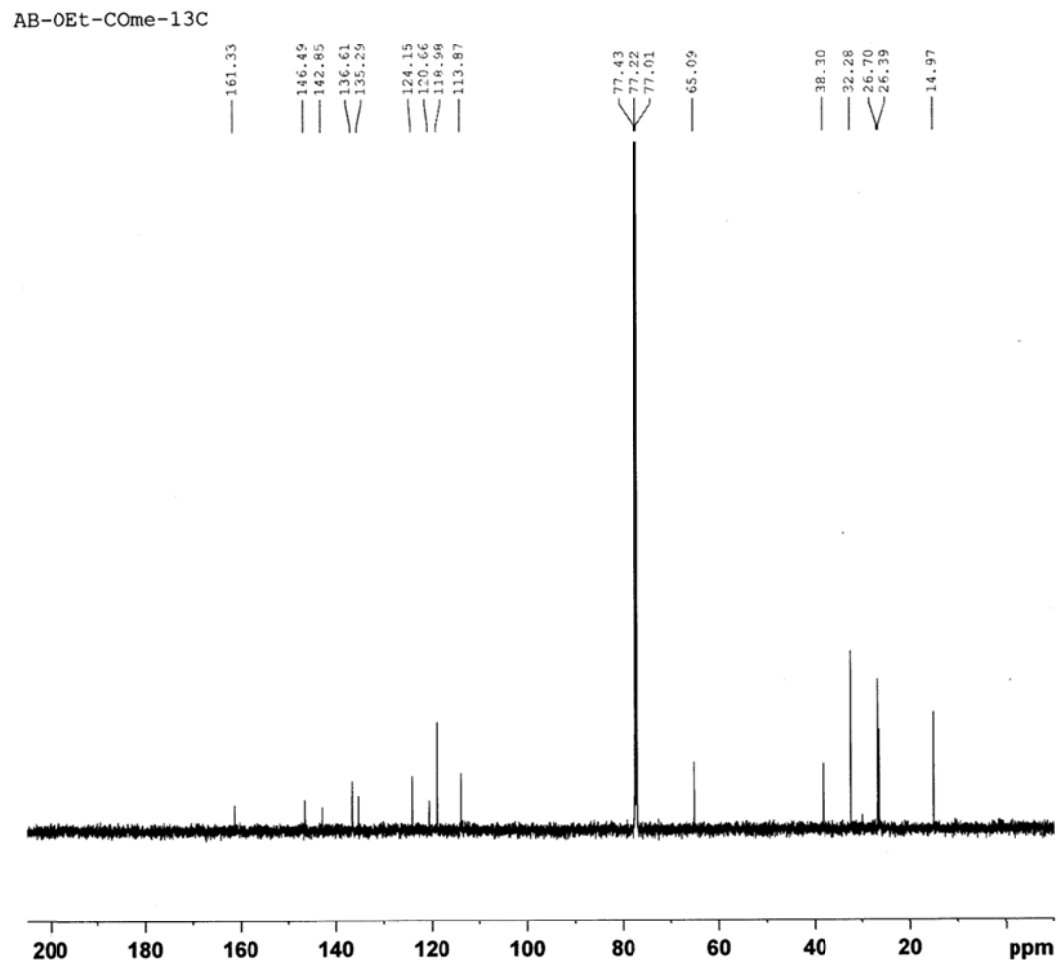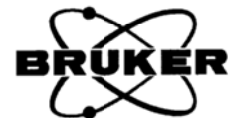

Current Data Parameters  
 NAME AB-OEt-COme-13C  
 EXPNO 1  
 PROCNO 1

F2 - Acquisition Parameters  
 Date\_ 20150305  
 Time 12.26  
 INSTRUM spect  
 PROBHD 5 mm PABBO BB/  
 PULPROG zgpg30  
 TD 32768  
 SOLVENT  $\text{CDCl}_3$   
 NS 201  
 DS 2  
 SWH 36057.691 Hz  
 FIDRES 1.100393 Hz  
 AQ 0.4543829 sec  
 RG 200.18  
 DW 13.867 usec  
 DE 6.50 usec  
 TE 298.0 K  
 D1 2.0000000 sec  
 D11 0.0300000 sec  
 TD0 1

===== CHANNEL f1 =====  
 SFO1 150.9279571 MHz  
 NUC1 13C  
 P1 10.50 usec  
 PLW1 95.0000000 W

===== CHANNEL f2 =====  
 SFO2 600.1724007 MHz  
 NUC2 1H  
 PCPD2 waltz16  
 PCPD2 70.00 usec  
 PLW2 21.0000000 W  
 PLW12 0.61714000 W  
 PLW13 0.30239999 W

F2 - Processing parameters  
 SI 16384  
 SF 150.9128372 MHz  
 WDW EM  
 SSB 0  
 LB 1.00 Hz  
 GB 0  
 PC 1.40

6,8-Di-*tert*-butyl-3-cyclohexyl-2*H*-chromen-2-one (4a): <sup>1</sup>H NMR (CDCl<sub>3</sub>, 600 MHz)

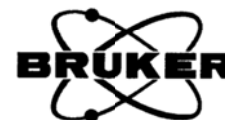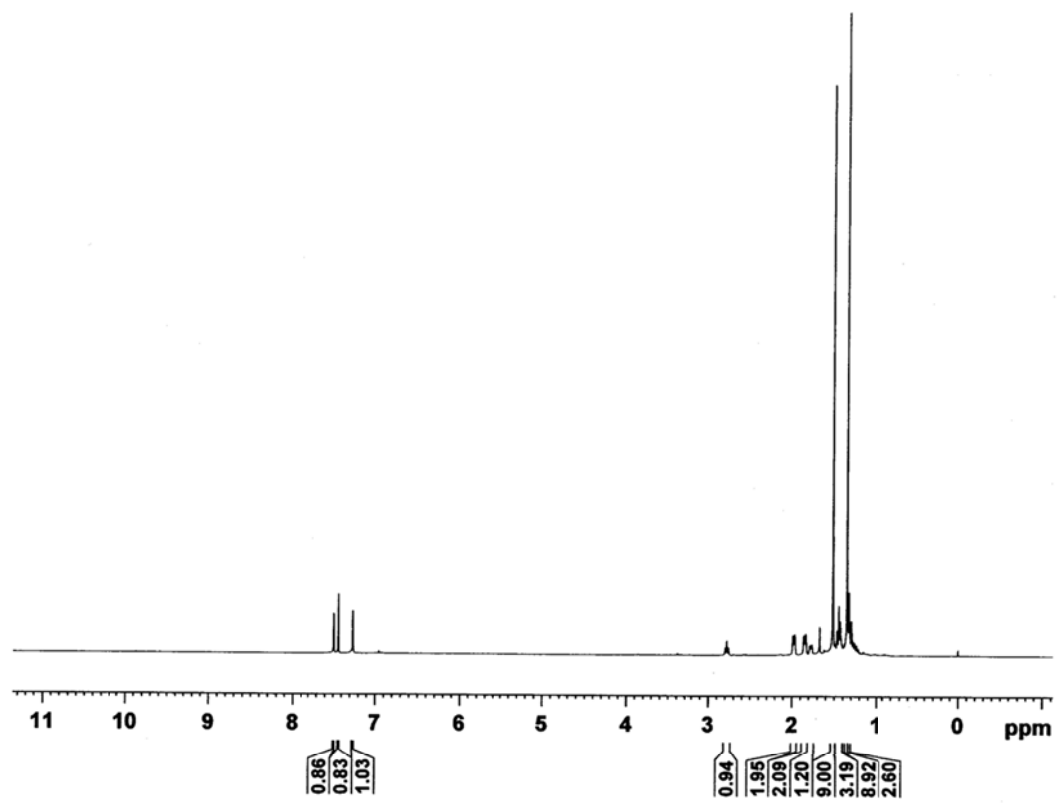

Current Data Parameters  
NAME SS-6,8-tBu-DTBP-1H  
EXPNO 1  
PROCNO 1

F2 - Acquisition Parameters  
Date\_ 20150318  
Time\_ 10.33  
INSTRUM spect  
PROBHD 5 mm PABBO BB/  
PULPROG zg30  
TD 65536  
SOLVENT CDCl3  
NS 16  
DS 2  
SWH 12019.230 Hz  
FIDRES 0.183399 Hz  
AQ 2.7262976 sec  
RG 31.5  
DW 41.600 usec  
DE 6.50 usec  
TE 297.7 K  
D1 1.0000000 sec  
TDO 1

===== CHANNEL f1 =====  
SFO1 600.1737063 MHz  
NUC1 1H  
P1 12.00 usec  
PLW1 21.0000000 W

F2 - Processing parameters  
SI 65536  
SF 600.1700142 MHz  
WDW EM  
SSB 0  
LB 0.30 Hz  
GB 0  
PC 1.00

6,8-Di-*tert*-butyl-3-cyclohexyl-2*H*-chromen-2-one (4a):  $^{13}\text{C}$  NMR ( $\text{CDCl}_3$ , 150 MHz)

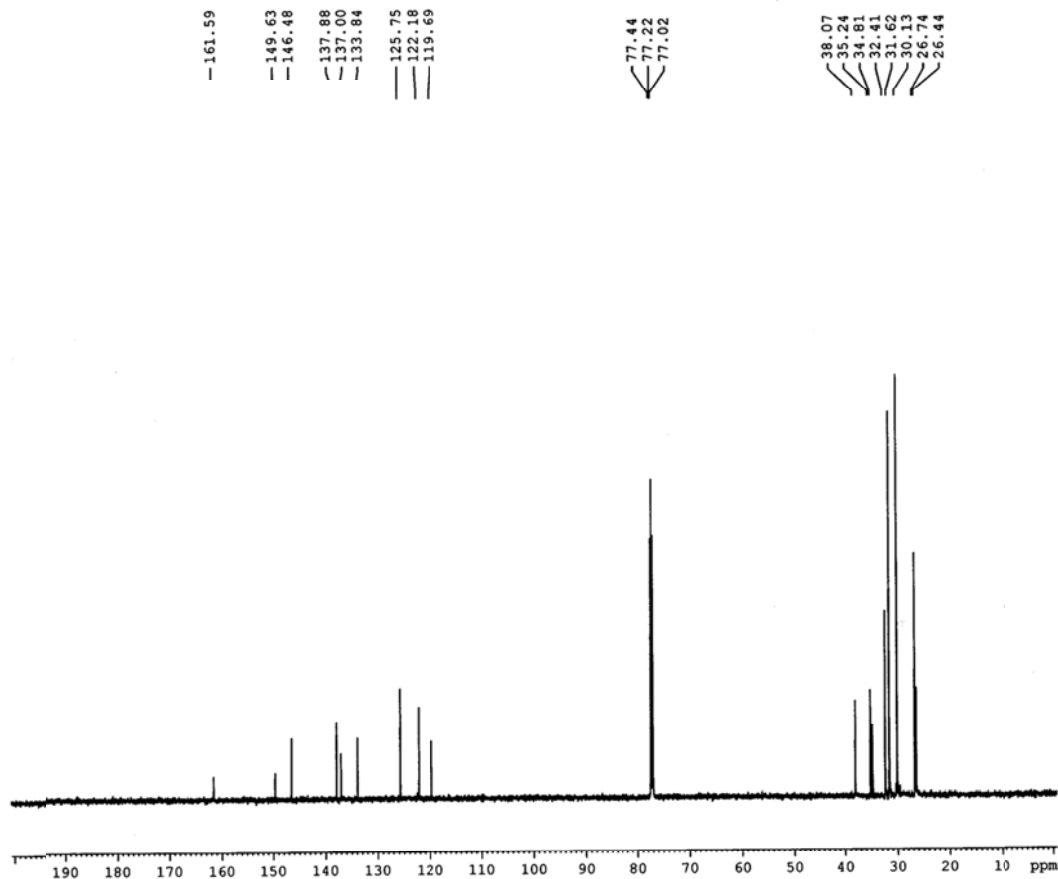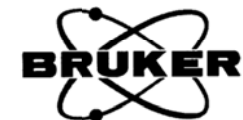

Current Data Parameters  
 NAME SS-6,8-tBu-DTBP-13C  
 EXPNO 1  
 PROCNO 1

F2 - Acquisition Parameters  
 Date\_ 20150318  
 Time 10.25  
 INSTRUM spect  
 PROBHD 5 mm PABBO BB/  
 PULPROG zgpg30  
 TD 32768  
 SOLVENT CDCl3  
 NS 120  
 DS 2  
 SWH 36057.691 Hz  
 FIDRES 1.100393 Hz  
 AQ 0.4543829 sec  
 RG 65.24  
 DW 13.867 usec  
 DE 6.50 usec  
 TE 298.0 K  
 D1 2.00000000 sec  
 D11 0.03000000 sec  
 TD0 1

===== CHANNEL f1 =====  
 SFO1 150.9279571 MHz  
 NUC1 13C  
 P1 10.50 usec  
 PLW1 95.00000000 W

===== CHANNEL f2 =====  
 SFO2 600.1724007 MHz  
 NUC2 1H  
 CPDPRG[2] waltz16  
 FCPD2 70.00 usec  
 PLW2 21.00000000 W  
 PLW12 0.61714000 W  
 PLW13 0.30239999 W

F2 - Processing parameters  
 SI 16384  
 SF 150.9128381 MHz  
 WDW EM  
 SSB 0  
 LB 1.00 Hz  
 GB 0  
 PC 1.40

3-Cyclohexyl-6-nitro-2H-chromen-2-one (5a): <sup>1</sup>H NMR (CDCl<sub>3</sub>, 600 MHz)

6-NO<sub>2</sub>COMe-DTBP- 1H

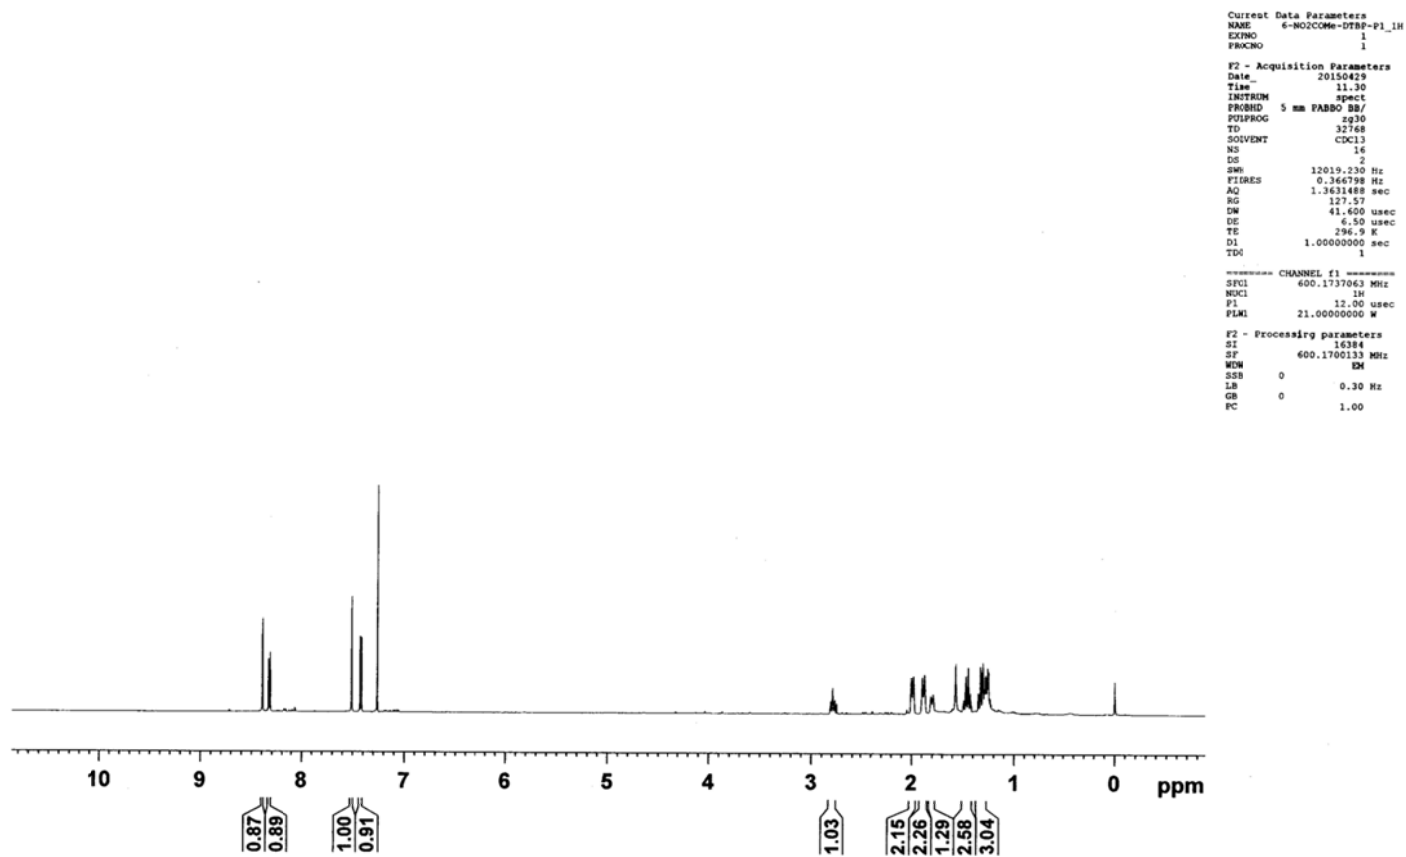

3-Cyclohexyl-6-nitro-2H-chromen-2-one (5a):  $^{13}\text{C}$  NMR ( $\text{CDCl}_3$ , 150 MHz)

AB-6NO2-BTBP-13C

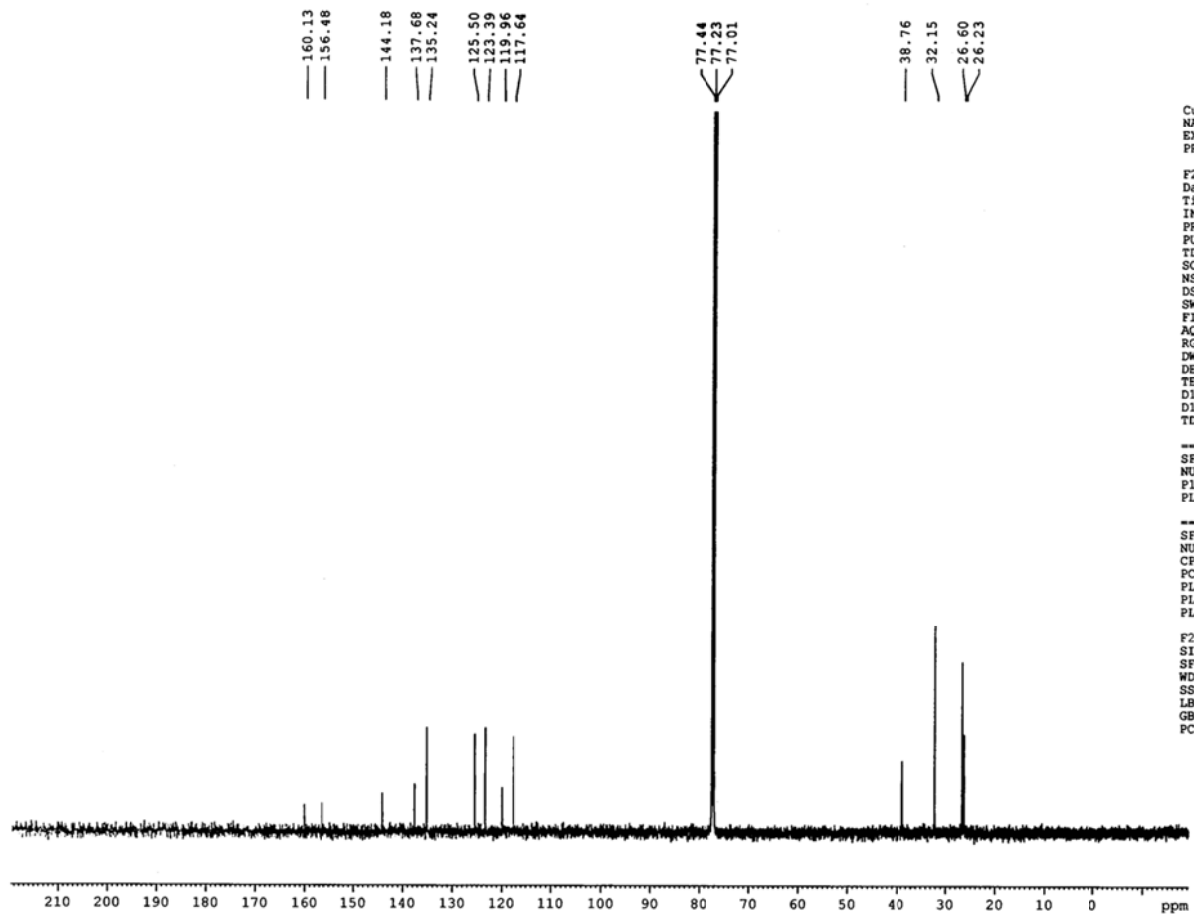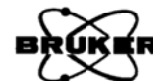

Current Data Parameters  
 NAME AB-6NO2-BTBP-13C  
 EXPNO 1  
 PROCNO 1

F2 - Acquisition Parameters  
 Date\_ 20150430  
 Time 12.34  
 INSTRUM spect  
 PROBHD 5 mm PABBO BB/  
 PULPROG zgpg30  
 TD 32768  
 SOLVENT CDCl3  
 NS 733  
 DS 2  
 SWH 36057.691 Hz  
 FIDRES 1.100393 Hz  
 AQ 0.4543829 sec  
 RG 200.18  
 DW 13.867 usec  
 DE 6.50 usec  
 TE 297.6 K  
 D1 2.0000000 sec  
 D11 0.0300000 sec  
 TDO 1

----- CHANNEL f1 -----  
 SFO1 150.9279571 MHz  
 NUC1 13C  
 P1 10.50 usec  
 PLW1 95.0000000 W

----- CHANNEL f2 -----  
 SFO2 600.1724007 MHz  
 NUC2 1H  
 CPDPRG2 waltz16  
 PCPD2 70.00 usec  
 PLW2 21.0000000 W  
 PLW12 0.61714000 W  
 PLW13 0.30239999 W

F2 - Processing parameters  
 SI 16384  
 SF 150.9128347 MHz  
 WDW EM  
 SSB 0  
 LB 1.00 Hz  
 GB 0  
 PC 1.40

6,8-Dichloro-3-cyclohexyl-2H-chromen-2-one (6a): <sup>1</sup>H NMR (CDCl<sub>3</sub>, 600 MHz)

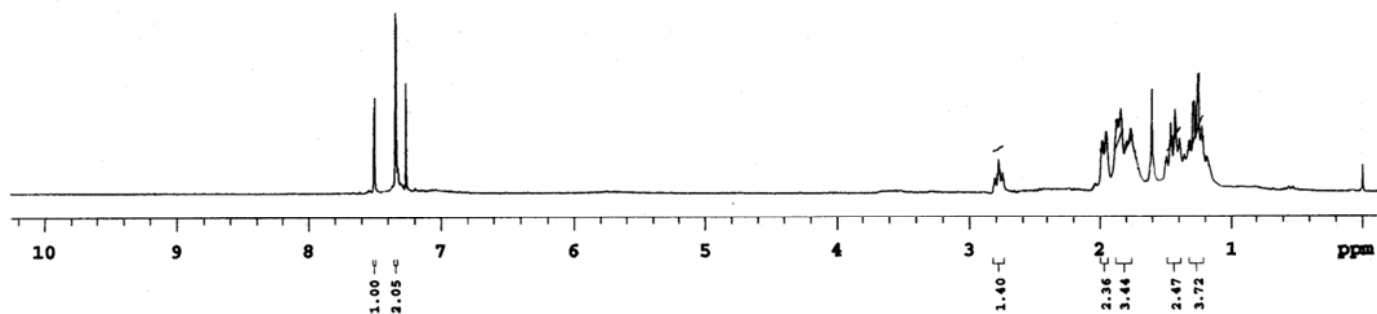

|                                                                                                                                   |                                |                                                                 |                                                                                                                       |
|-----------------------------------------------------------------------------------------------------------------------------------|--------------------------------|-----------------------------------------------------------------|-----------------------------------------------------------------------------------------------------------------------|
| <b>PULSE SEQUENCE</b><br>Relax. delay 1.000 sec<br>Pulse 45.0 degrees<br>Acq. time 2.561 sec<br>Width 6398.0 Hz<br>32 repetitions | <b>OBSERVE</b> H1, 399.8509609 | <b>DATA PROCESSING</b><br>FT size 32768<br>Total time 1 minutes | <b>AB-68ClOChs-DTSP-P1-1H</b><br>Solvent: cdcl3<br>Temp. 25.0 C / 298.1 K<br>Operator: chem<br>Mercury-400 "IITG-NMR" |
|-----------------------------------------------------------------------------------------------------------------------------------|--------------------------------|-----------------------------------------------------------------|-----------------------------------------------------------------------------------------------------------------------|

6,8-Dichloro-3-cyclohexyl-2H-chromen-2-one (6a):  $^{13}\text{C}$  NMR ( $\text{CDCl}_3$ , 150 MHz)

AB-68C1-BTPB\_13C

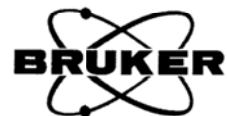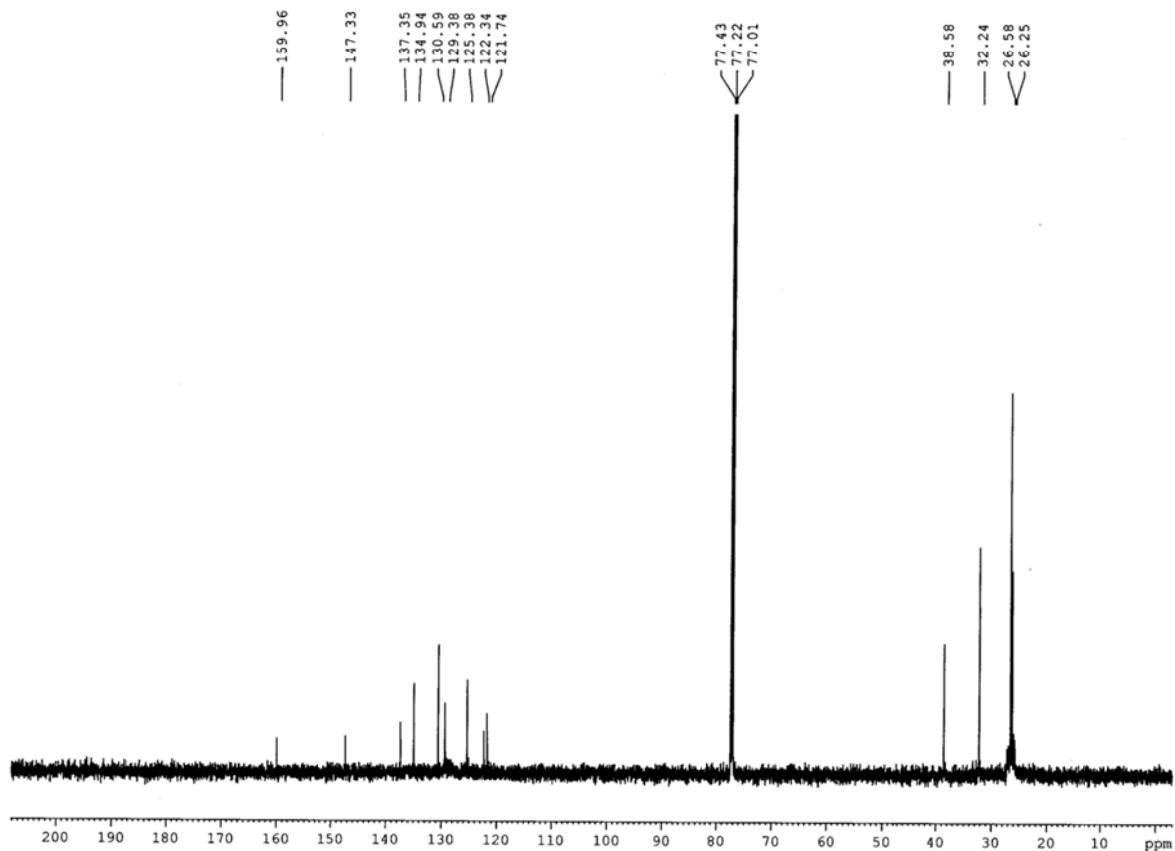

```

Current Data Parameters
NAME      AB-68C1-BTPB_13C
EXPNO     1
PROCNO    1

F2 - Acquisition Parameters
Date_     20150417
Time      12.20
INSTRUM   spect
PROBHD    5 mm PABBO BB/
PULPROG   zgpg30
TD         32768
SOLVENT   CDCl3
NS         225
DS         2
SWH        36057.691 Hz
FIDRES     1.100393 Hz
AQ         0.4543829 sec
RG         65.24
DW         13.867 usec
DE         6.50 usec
TE         298.5 K
D1         2.0000000 sec
D11        0.03000000 sec
TDO        1

----- CHANNEL f1 -----
SFO1      150.9279571 MHz
NUC1       13C
P1         10.50 usec
PLW1       95.00000000 W

----- CHANNEL f2 -----
SFO2      600.1724007 MHz
NUC2       1H
CPOPRG(2) waltra16
PCPD2     70.00 usec
PLW2      21.00000000 W
PLW12     0.61714000 W
PLW13     0.30239999 W

F2 - Processing parameters
SI         16384
SF         150.9128368 MHz
WDW        EM
SSB        0
LB         1.00 Hz
GB         0
PC         1.40
    
```

6,8-Bromo-3-cyclohexyl-2H-chromen-2-one (7a): <sup>1</sup>H NMR (CDCl<sub>3</sub>, 600 MHz)

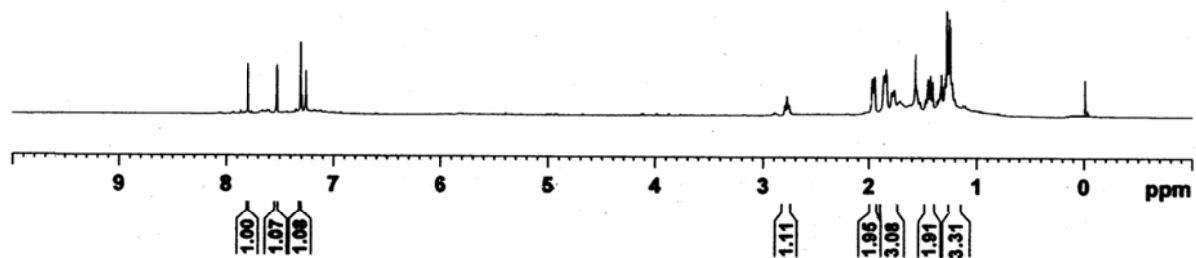

```
Current Data Parameters
NAME AS-68BrCOMB-1M
EXPNO 1
PROCNO 1

F2 - Acquisition Parameters
Date_ 20180809
Time 12.13
INSTRUM spect
PROBHD 5 mm PABBO BB/
PULPROG zgpg30
TD 32768
SOLVENT CDCl3
NS 16
DS 2
SWH 12019.230 Hz
FIDRES 0.366796 Hz
AQ 1.3631488 sec
RG 99.36
DE 41.600 usec
TE 298.7 K
SI 1.0000000 sec
TDO 1

----- CHANNEL f1 -----
SFO1 600.137063 MHz
NUC1 1H
SI 12.00 usec
FLW1 21.00000000 M

F2 - Processing parameters
SI 16384
SF 600.1700141 MHz
WDW EM
SSB 0
LB 0.30 Hz
GB 0
PC 1.00
```



6,8-Bromo-3-cyclohexyl-2H-chromen-2-one (7a): <sup>13</sup>C NMR (CDCl<sub>3</sub>, 150 MHz)

AB-68BrDp-13C

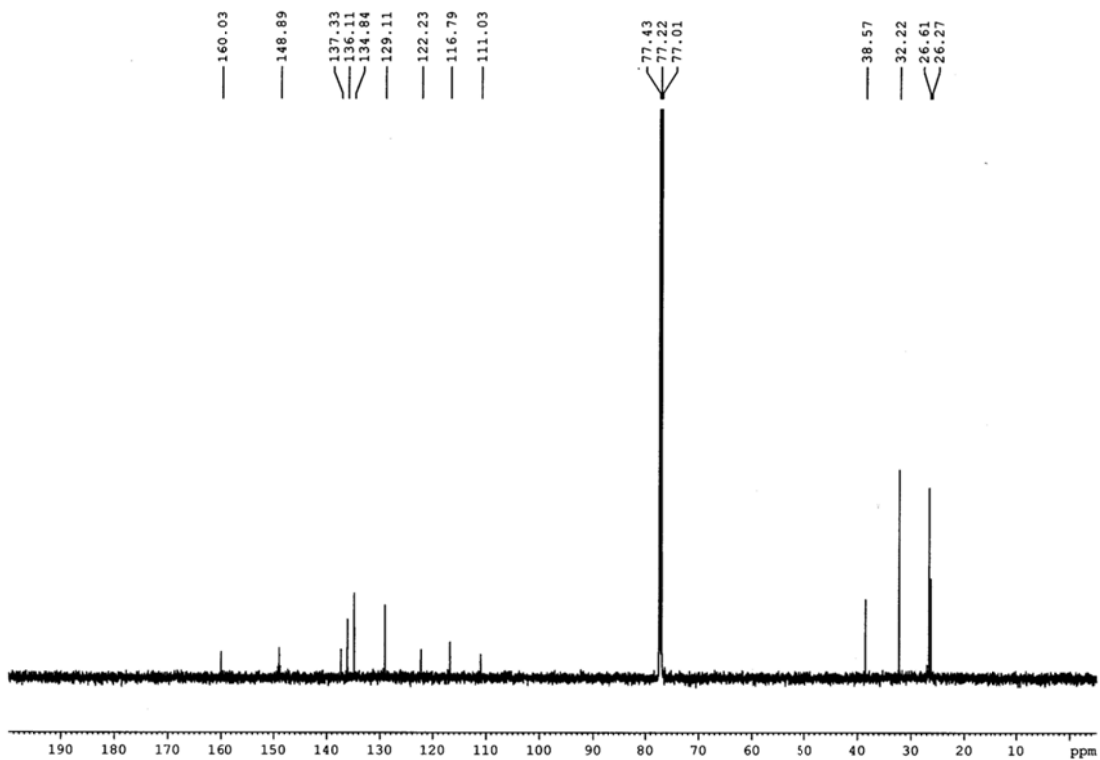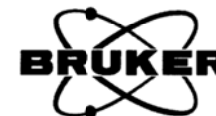

Current Data Parameters  
NAME AB-68BrDp-13C  
EXPNO 1  
PROCNO 1

F2 - Acquisition Parameters  
Date\_ 20150511  
Time 13.32  
INSTRUM spect  
PROBHD 5 mm PABBO BB/  
PULPROG zgpg30  
TD 32768  
SOLVENT CDCl3  
NS 765  
DS 2  
SWH 36057.691 Hz  
FIDRES 1.100393 Hz  
AQ 0.4543829 sec  
RG 200.18  
DW 13.867 usec  
DE 6.50 usec  
TE 299.9 K  
D1 2.0000000 sec  
D11 0.0300000 sec  
TDO 1

----- CHANNEL #1 -----  
SF01 150.9279571 MHz  
NUC1 13C  
P1 10.50 usec  
PLM1 95.0000000 W

----- CHANNEL #2 -----  
SF02 600.1724007 MHz  
NUC2 1H  
CPDPRG12 waltz16  
PCPD2 70.00 usec  
PLM2 21.0000000 W  
PLM12 0.61714000 W  
PLM13 0.302399999 W

F2 - Processing parameters  
SI 16384  
SF 150.9126332 MHz  
WDW EM  
SSB 0  
LB 1.00 Hz  
GB 0  
PC 1.40

2-Cyclohexyl-3H-benzo[f]chromen-3-one (8a): <sup>1</sup>H NMR (CDCl<sub>3</sub>, 600 MHz)

AE\_NAPCOME-1H

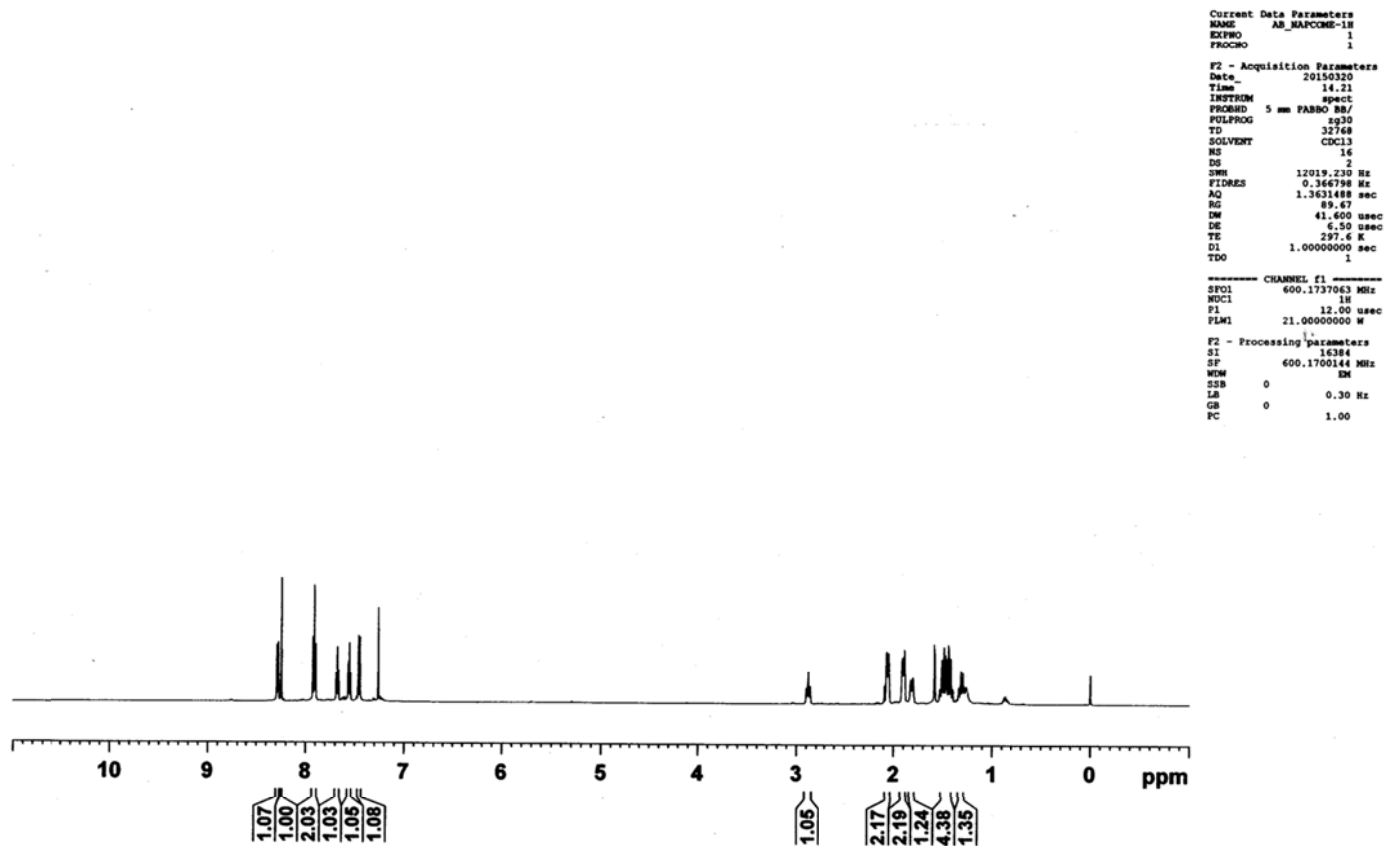

2-Cyclohexyl-3H-benzo[f]chromen-3-one (8a):  $^{13}\text{C}$  NMR ( $\text{CDCl}_3$ , 150 MHz)

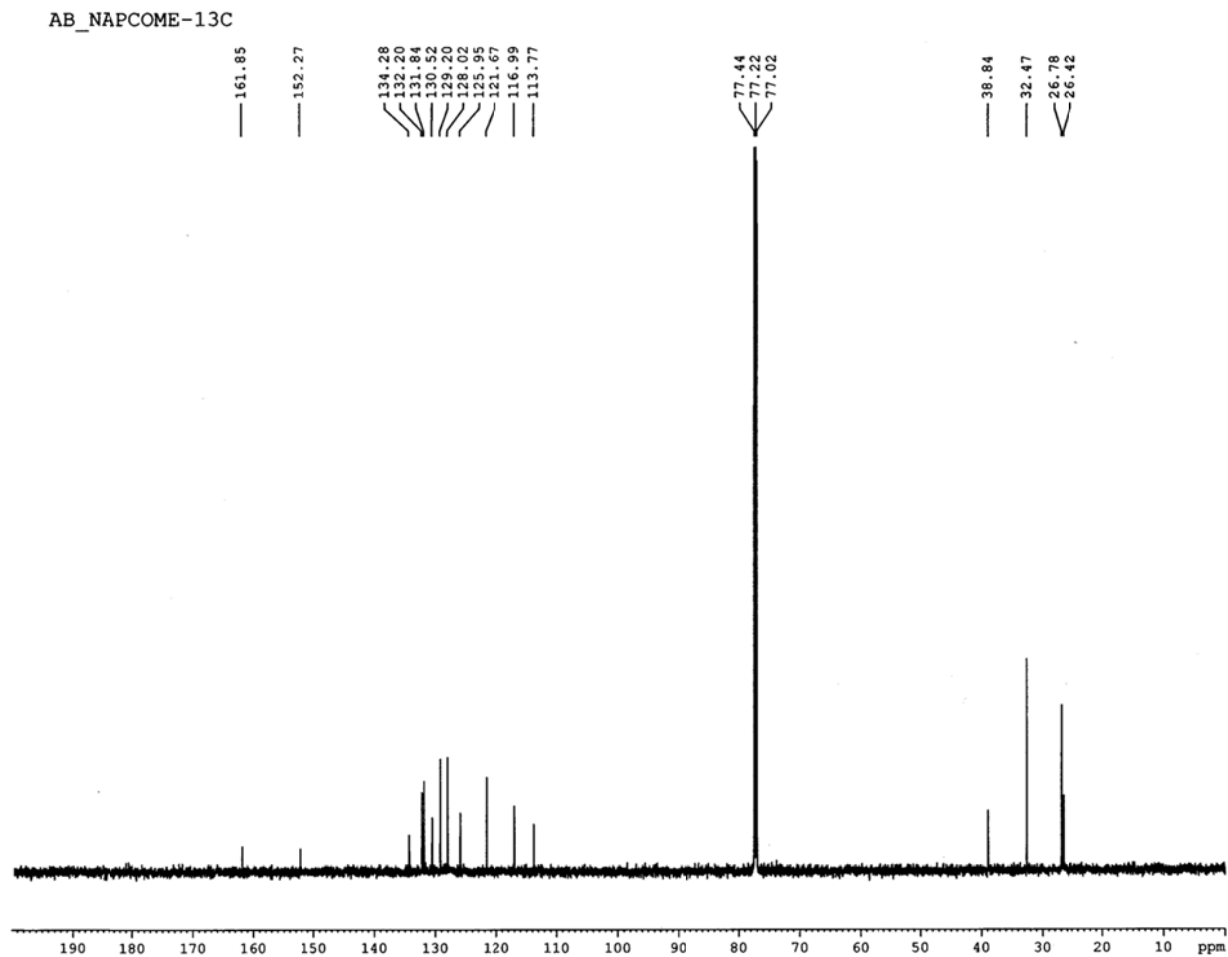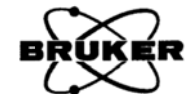

```

Current Data Parameters
NAME      Ab_NAPCOME-13C
EXPNO     1
PROCNO    1

F2 - Acquisition Parameters
Date_     20150320
Time      14.26
INSTRUM   spect
PROBHD    5 mm PABBO BB/
PULPROG   zgpg30
TD         32768
SOLVENT   CDCl3
NS         237
DS         2
SWH        36057.691 Hz
FIDRES     1.100393 Hz
AQ         0.4543829 sec
RG         65.24
DW         13.867 usec
DE         6.50 usec
TE         298.7 K
D1         2.0000000 sec
D11        0.0300000 sec
TD0        1

===== CHANNEL f1 =====
SF01      150.9279571 MHz
NUC1       13C
P1         10.50 usec
PLM1       95.00000000 W

===== CHANNEL f2 =====
SF02      600.1724007 MHz
NUC2       1H
CPDPRG2   waltz16
PCPD2     70.00 usec
PLM2      21.00000000 W
PLM12     0.61714000 W
PLM13     0.30239999 W

F2 - Processing parameters
SI         16384
SF         150.9128359 MHz
NMW        EM
SGB        0
LB         1.00 Hz
GB         0
PC         1.40
    
```

3-Cyclopentyl-2H-chromen-2-one (1b): <sup>1</sup>H NMR (CDCl<sub>3</sub>, 600 MHz)

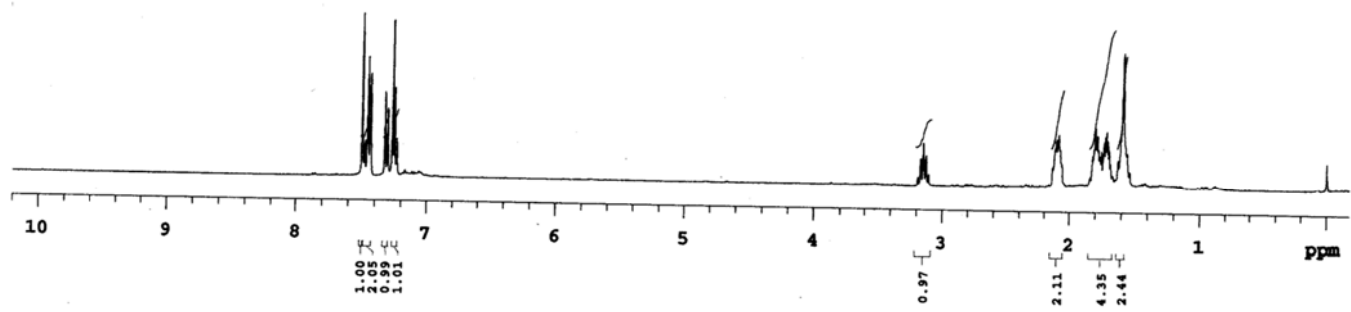

|                                                                                                                                   |                                |                                                                 |                                                                                                                    |
|-----------------------------------------------------------------------------------------------------------------------------------|--------------------------------|-----------------------------------------------------------------|--------------------------------------------------------------------------------------------------------------------|
| <b>PULSE SEQUENCE</b><br>Relax. delay 1.000 sec<br>Pulse 45.0 degrees<br>Acq. time 2.561 sec<br>Width 6398.0 Hz<br>64 repetitions | <b>OBSERVE</b> F1, 399.8509613 | <b>DATA PROCESSING</b><br>FT size 32768<br>Total time 3 minutes | <b>AB-COMe-PentDTBP-1H</b><br>Solvent: cdcl3<br>Temp. 25.0 C / 298.1 K<br>Operator: chem<br>Mercury-400 *IITG-NMR* |
|-----------------------------------------------------------------------------------------------------------------------------------|--------------------------------|-----------------------------------------------------------------|--------------------------------------------------------------------------------------------------------------------|

3-Cyclopentyl-2H-chromen-2-one (1b): <sup>13</sup>C NMR (CDCl<sub>3</sub>, 150 MHz)

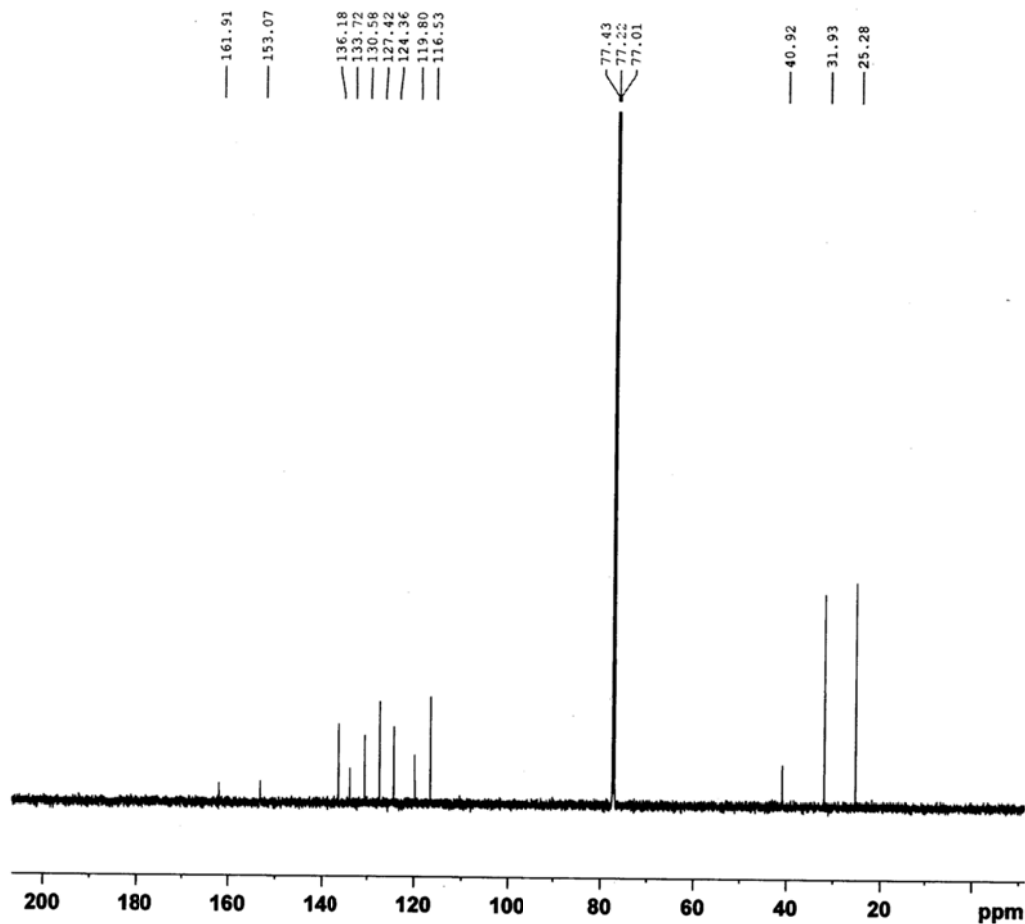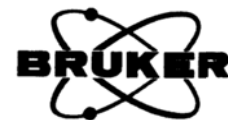

Current Data Parameters  
 NAME AB-COMe-pent-DTBP-13C  
 EXPNO 1  
 PROCNO 1

F2 - Acquisition Parameters  
 Date 20150416  
 Time 11.19  
 INSTRUM spect  
 PROBHD 5 mm PABBO B8/  
 PULPROG zgpg30  
 TD 32768  
 SOLVENT CDCl3  
 NS 274  
 DS 2  
 SWH 36057.691 Hz  
 FIDRES 1.100393 Hz  
 AQ 0.4543829 sec  
 RG 200.18  
 DW 13.867 usec  
 DE 6.50 usec  
 TE 298.8 K  
 D1 2.00000000 sec  
 D11 0.03000000 sec  
 TDO 1

----- CHANNEL f1 -----  
 SFO1 150.9279571 MHz  
 NUC1 13C  
 P1 10.50 usec  
 PLW1 95.00000000 W

----- CHANNEL f2 -----  
 SFO2 600.1724007 MHz  
 NUC2 1H  
 CPDPRG2 waltz16  
 PCPD2 70.00 usec  
 PLW2 21.00000000 W  
 PLW12 0.61714000 W  
 PLW13 0.30239999 W

F2 - Processing parameters  
 SI 16384  
 SF 150.9128358 MHz  
 WDW EM  
 SSB 0  
 LB 1.00 Hz  
 GB 0  
 PC 1.40

3-Cyclooctyl-2H-chromen-2-one (1c): <sup>1</sup>H NMR (CDCl<sub>3</sub>, 600 MHz)

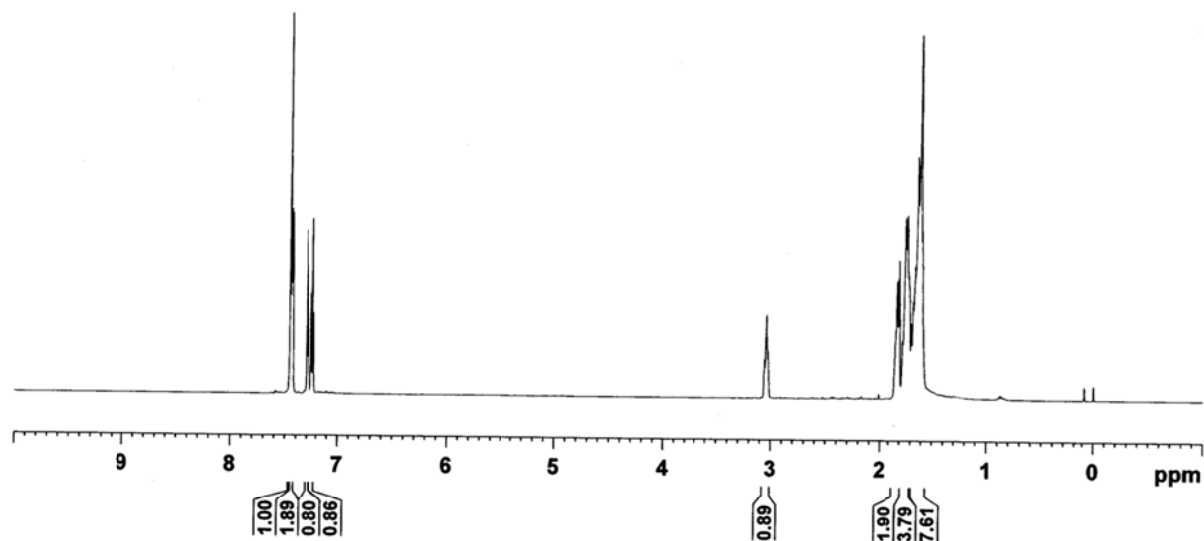

```
Current: Data Parameters
NAME AB-CoMe-OCT-P1_1H
EXPNO 1
PROCNO 1

F2 - Acquisition Parameters
Date_ 20150408
Time 15.36
INSTRUM spect
PROBHD 5 mm FASBO BB/
PULPROG zg30
TD 32768
SOLVENT CDCl3
NS 16
DS 2
SWH 12019.230 Hz
FIDRES 0.366798 Hz
AQ 1.3631488 sec
RG 18.03
DW 41.600 usec
DE 6.50 usec
TE 297.1 K
D1 1.00000000 sec
TD0 1

===== CHANNEL f1 =====
SFO1 600.1737063 MHz
NUC1 1H
P1 12.00 usec
PLW1 21.00000000 W

F2 - Processing parameters
SI 16384
SF 600.1700051 MHz
WDW EM
SSB 0
LB 0.30 Hz
GB 0
PC 1.00
```

3-Cyclooctyl-2H-chromen-2-one (1c):  $^{13}\text{C}$  NMR ( $\text{CDCl}_3$ , 150 MHz)

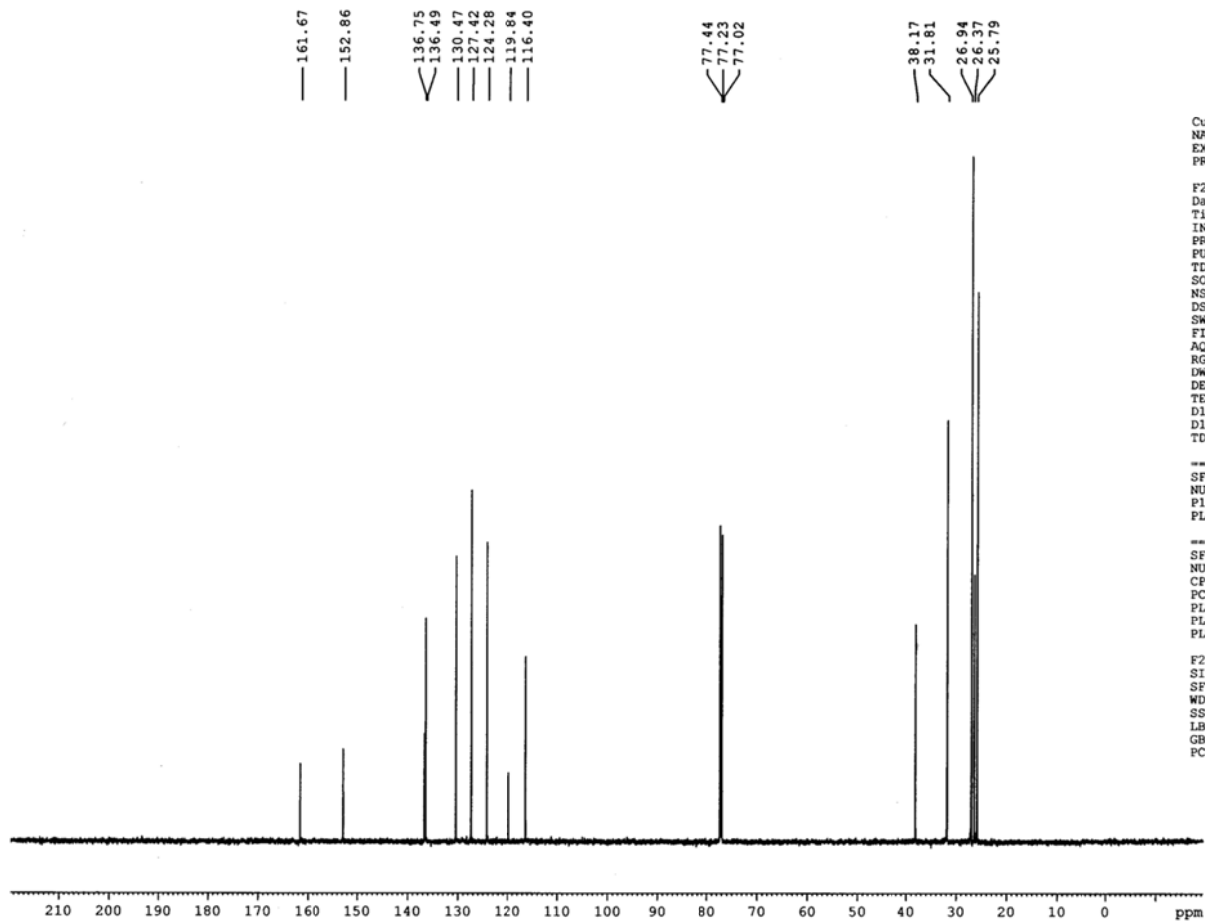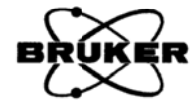

```

Current Data Parameters
NAME      AB-CoMe-OCT-P1_13C
EXPNO     1
PROCNO    1

F2 - Acquisition Parameters
Date_     20150408
Time      15.29
INSTRUM   spect
PROBHD    5 mm PABBO BB/
PULPROG   zgpg30
TD        32768
SOLVENT   CDCl3
NS        101
DS        2
SWH       36057.691 Hz
FIDRES    1.100393 Hz
AQ        0.4543829 sec
RG        65.24
DW        13.867 usec
DE        6.50 usec
TE        297.2 K
D1        2.006000000 sec
D11       0.030000000 sec
TD0       1

----- CHANNEL f1 -----
SFO1      150.9279571 MHz
NUC1      13C
P1        10.50 usec
PLW1      95.00000000 W

----- CHANNEL f2 -----
SFO2      600.1724007 MHz
NUC2      1H
CPDPRG2   waltz16
PCPD2     70.00 usec
PLW2      21.00000000 W
PLW12     0.61714000 W
PLW13     0.30239999 W

F2 - Processing parameters
SI        16384
SF        150.9128447 MHz
WDW       EM
SSB       0
LB        1.00 Hz
GB        0
PC        1.40
    
```

3-Benzyl-2H-chromen-2-one (1d): <sup>1</sup>H NMR (CDCl<sub>3</sub>, 600 MHz)

AB-COME-TOL\_ 1H

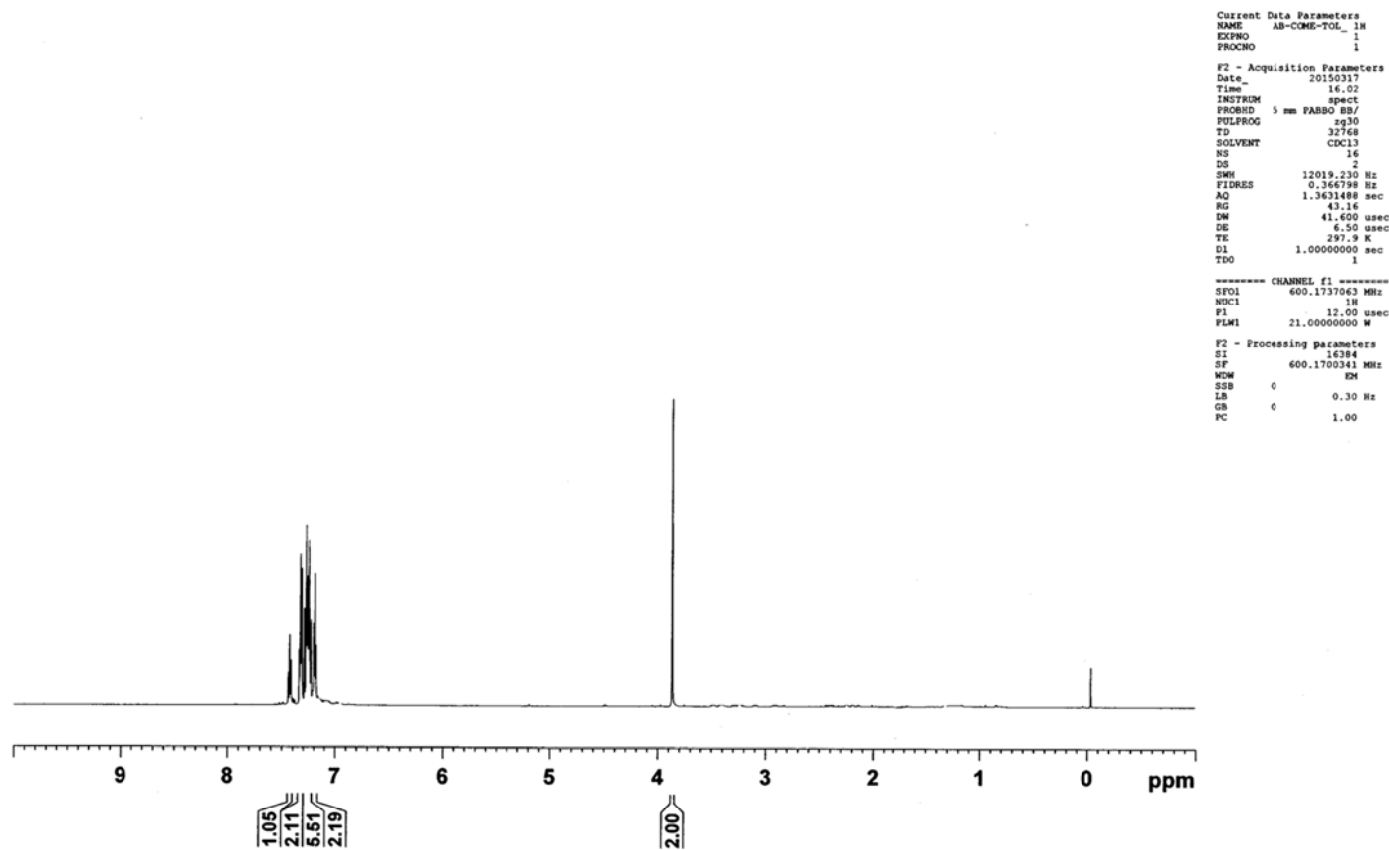



3-Benzyl-2H-chromen-2-one (1d): <sup>13</sup>C NMR (CDCl<sub>3</sub>, 150 MHz)

AB\_COMETOL-13C

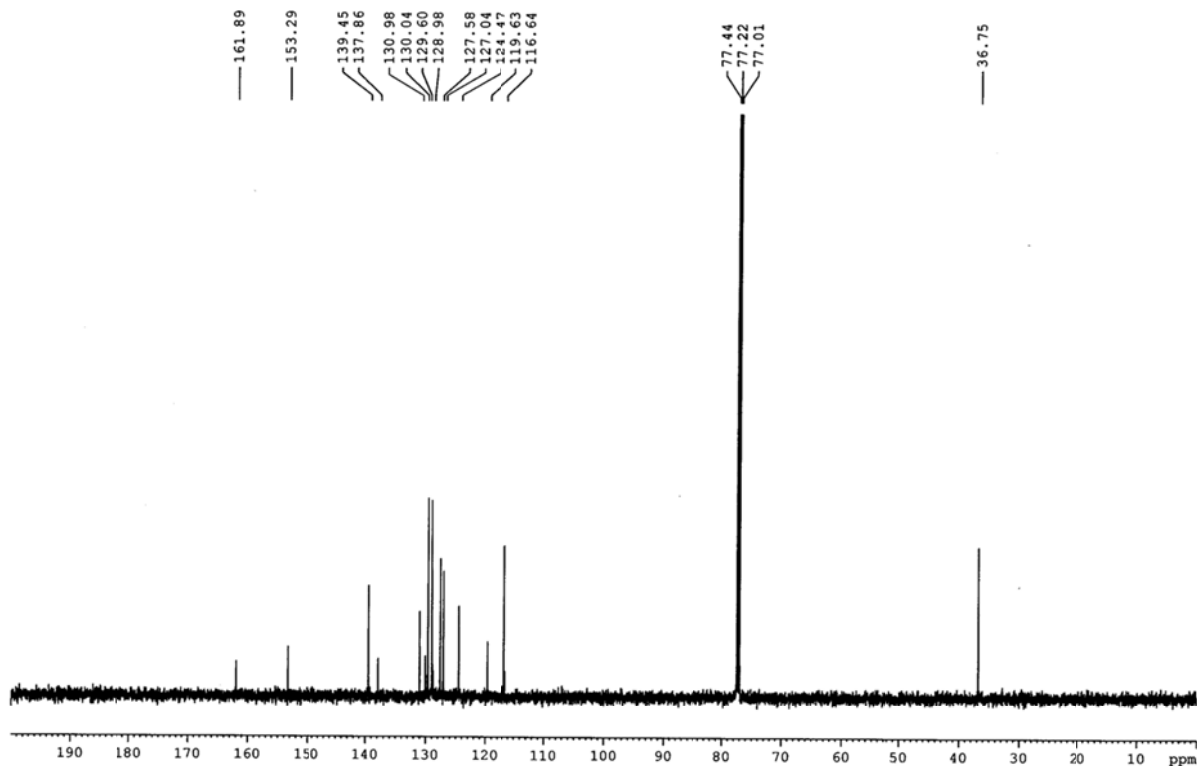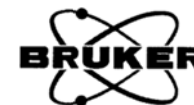

Current Data Parameters  
NAME AB\_COMETOL-13C  
EXPNO 1  
PROCNO 1

F2 - Acquisition Parameters  
Date\_ 20150320  
Time 13.33  
INSTRUM spect  
PROBHD 5 mm PABBO BB/  
PULPROG zgpg30  
TD 32768  
SOLVENT CDCl3  
NS 105  
DS 2  
SWH 36057.691 Hz  
FIDRES 1.100393 Hz  
AQ 0.4543829 sec  
RG 65.24  
DM 13.867 usec  
DE 6.50 usec  
TE 298.2 K  
D1 2.0000000 sec  
D11 0.0300000 sec  
TDO 1

----- CHANNEL f1 -----  
SF01 150.9279571 MHz  
NUC1 13C  
P1 10.50 usec  
PLW1 95.0000000 W

----- CHANNEL f2 -----  
SF02 600.1724007 MHz  
NUC2 1H  
CPDPRG2 waltz16  
PCPD2 70.00 usec  
PLW2 21.0000000 W  
PLW12 0.61714000 W  
PLW13 0.30239999 W

F2 - Processing parameters  
SI 16384  
SF 150.9128381 MHz  
WDW EM  
SSB 0  
LB 1.00 Hz  
GB 0  
PC 1.40

3-(4-Methylbenzyl)-2H-chromen-2-one (1e): <sup>1</sup>H NMR (CDCl<sub>3</sub>, 400 MHz)

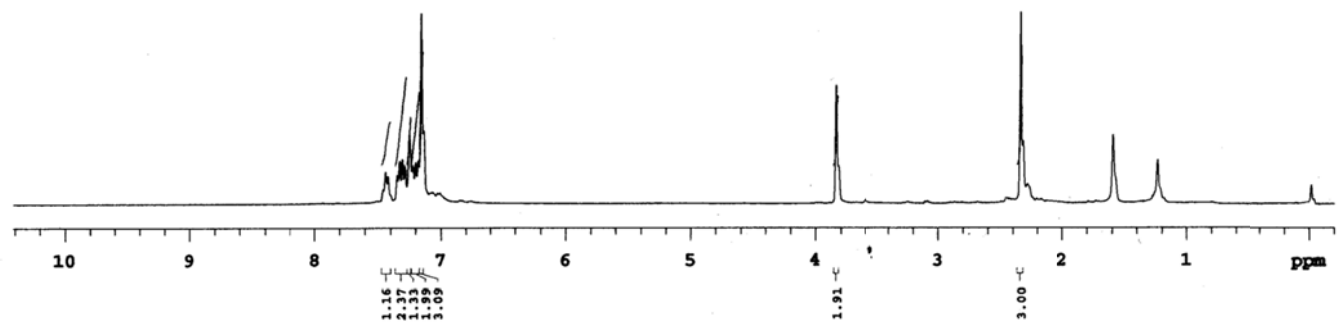

|                                                                                                                                   |                                |                                                                 |                                                                                                                 |
|-----------------------------------------------------------------------------------------------------------------------------------|--------------------------------|-----------------------------------------------------------------|-----------------------------------------------------------------------------------------------------------------|
| <b>PULSE SEQUENCE</b><br>Relax. delay 1.000 sec<br>Pulse 45.0 degrees<br>Acq. time 2.561 sec<br>Width 6398.0 Hz<br>32 repetitions | <b>OBSERVE</b> H1, 399.8509634 | <b>DATA PROCESSING</b><br>FT size 32768<br>Total time 1 minutes | <b>AB-COM6-P-XY1-1H</b><br>Solvent: cdcl3<br>Temp. 25.0 C / 298.1 K<br>Operator: chem<br>Mercury-400 "IITG-MMR" |
|-----------------------------------------------------------------------------------------------------------------------------------|--------------------------------|-----------------------------------------------------------------|-----------------------------------------------------------------------------------------------------------------|

3-(4-Methylbenzyl)-2H-chromen-2-one (1e): <sup>13</sup>C NMR (CDCl<sub>3</sub>, 100 MHz)

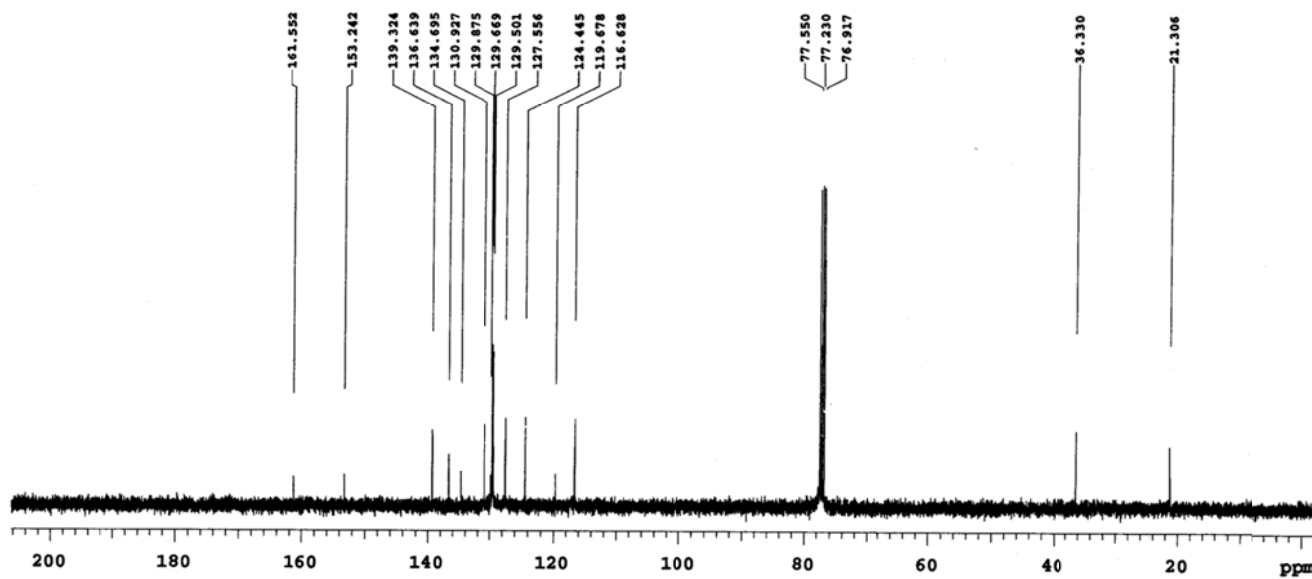

|                                                                                                                                                                                                                                       |                                                                                                                                                                                           |                                                                                                                                                         |                                                                                                                                                                                                    |
|---------------------------------------------------------------------------------------------------------------------------------------------------------------------------------------------------------------------------------------|-------------------------------------------------------------------------------------------------------------------------------------------------------------------------------------------|---------------------------------------------------------------------------------------------------------------------------------------------------------|----------------------------------------------------------------------------------------------------------------------------------------------------------------------------------------------------|
| <p><b>PULSE SEQUENCE</b><br/>                 Relax. delay 1.000 sec<br/>                 Pulse 45.0 degrees<br/>                 Acq. time 1.304 sec<br/>                 Width 25125.6 Hz<br/>                 1290 repetitions</p> | <p><b>OBSERVE</b> C13, 100.5425824<br/> <b>DECOUPLE</b> H1, 399.8529994<br/>                 Power 42 dB<br/>                 continuously on<br/>                 WALTZ-16 modulated</p> | <p><b>DATA PROCESSING</b><br/>                 Line broadening 0.5 Hz<br/>                 FT size 65536<br/>                 Total time 49 minutes</p> | <p><b>AB-COMeCou-P-XYL-13C</b><br/>                 Solvent: cdcl3<br/>                 Temp. 25.0 C / 298.1 K<br/>                 Operator: chem<br/>                 Mercury-400 *IITG-MGR*</p> |
|---------------------------------------------------------------------------------------------------------------------------------------------------------------------------------------------------------------------------------------|-------------------------------------------------------------------------------------------------------------------------------------------------------------------------------------------|---------------------------------------------------------------------------------------------------------------------------------------------------------|----------------------------------------------------------------------------------------------------------------------------------------------------------------------------------------------------|

3-(3,5-Dimethylbenzyl)-2H-chromen-2-one (1f): <sup>1</sup>H NMR (CDCl<sub>3</sub>, 400 MHz)

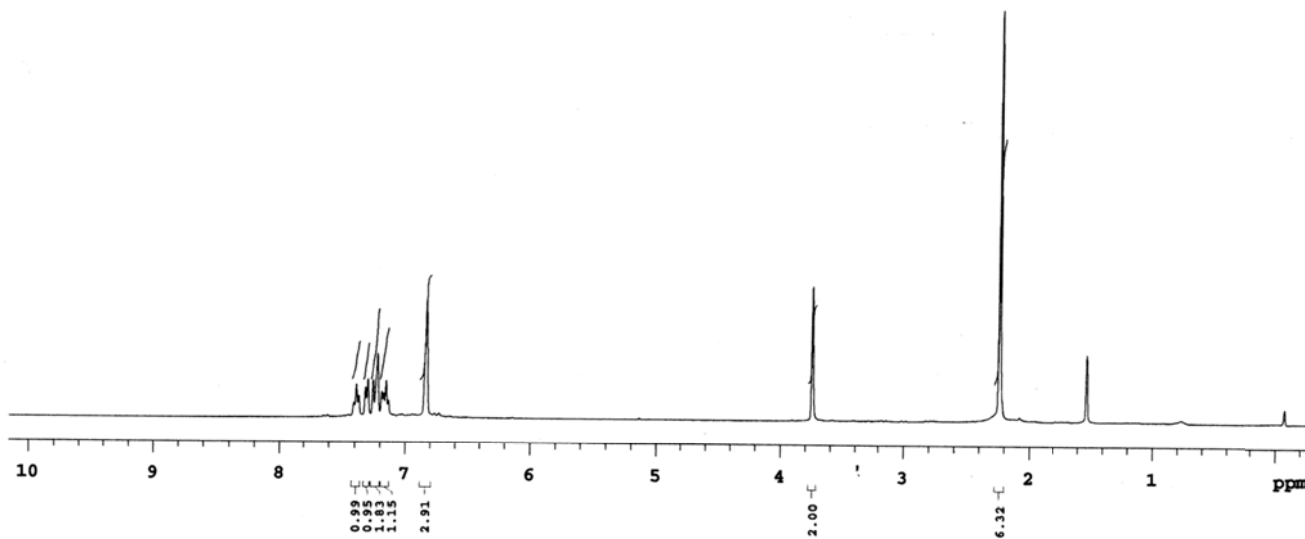

|                                                                                                                                   |                                |                                                                 |                                                                                                                                               |
|-----------------------------------------------------------------------------------------------------------------------------------|--------------------------------|-----------------------------------------------------------------|-----------------------------------------------------------------------------------------------------------------------------------------------|
| <b>PULSE SEQUENCE</b><br>Relax. delay 1.000 sec<br>Pulse 45.0 degrees<br>Acq. time 2.561 sec<br>Width 6398.0 Hz<br>32 repetitions | <b>OBSERVE</b> H1, 399.8509882 | <b>DATA PROCESSING</b><br>FT size 32768<br>Total time 1 minutes | <b>AB-COMe-Mes-DTBP-1H</b><br>Solvent: cdcl3<br>Temp. 25.0 C / 298.1 K<br>Operator: chem<br>File: AB-COMe-Mes-DTBP-1H<br>Mercury-400 "1H-NMR" |
|-----------------------------------------------------------------------------------------------------------------------------------|--------------------------------|-----------------------------------------------------------------|-----------------------------------------------------------------------------------------------------------------------------------------------|

3-(3,5-Dimethylbenzyl)-2H-chromen-2-one (1f):  $^{13}\text{C}$  NMR ( $\text{CDCl}_3$ , 150 MHz)

AB\_COME\_MeS\_13C

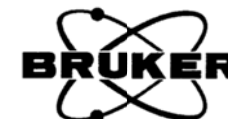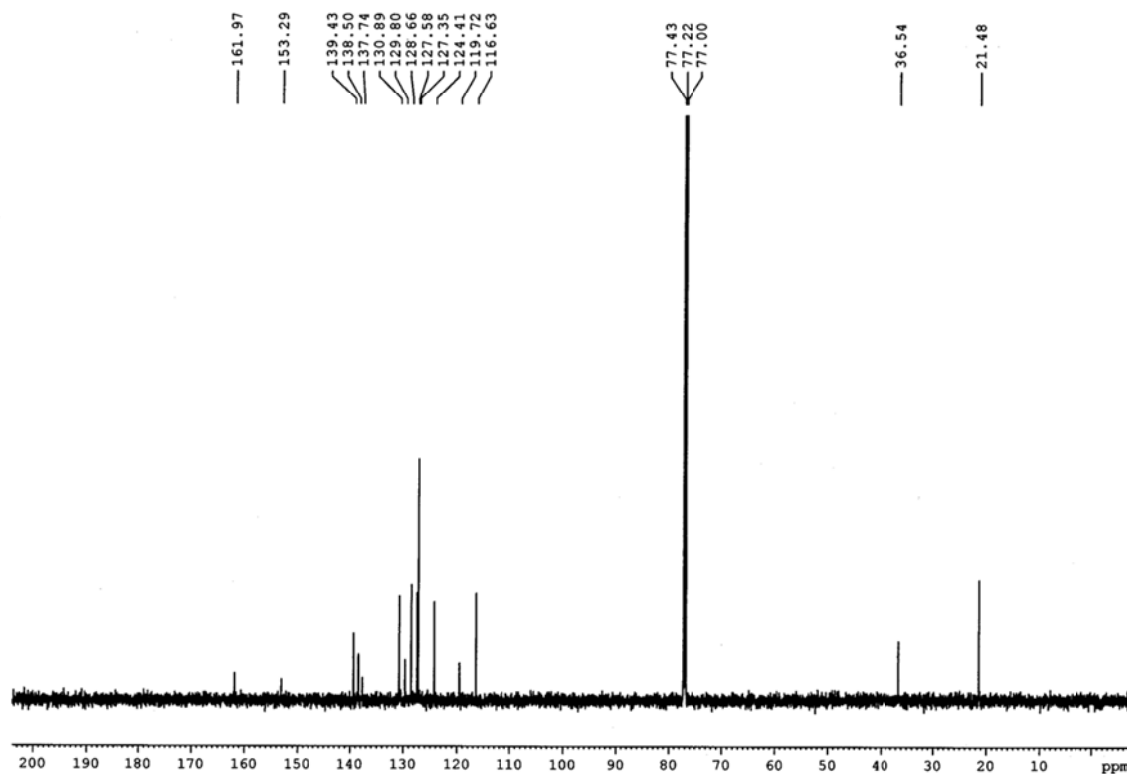

Current Data Parameters  
 NAME AB\_COME\_MeS\_13C  
 EXPNO 1  
 PROCNO 1

F2 - Acquisition Parameters  
 Date\_ 20150327  
 Time 14.59  
 INSTRUM spect  
 PROBHD 5 mm PABBO BB/  
 PULPROG zgpg30  
 TD 32768  
 SOLVENT CDCl3  
 NS 114  
 DS 2  
 SWH 36057.691 Hz  
 FIDRES 1.100393 Hz  
 AQ 0.4543829 sec  
 RG 65.24  
 DW 13.867 usec  
 DE 6.50 usec  
 TE 298.2 K  
 D1 2.00000000 sec  
 D11 0.03000000 sec  
 TD0 1

===== CHANNEL f1 =====  
 SFO1 150.9279571 MHz  
 NUC1 13C  
 P1 10.50 usec  
 PLW1 95.00000000 W

===== CHANNEL f2 =====  
 SFO2 600.1724007 MHz  
 NUC2 1H  
 CPDPRG[2] waltz16  
 PCPD2 70.00 usec  
 PLW2 21.00000000 W  
 PLW12 0.61714000 W  
 PLW13 0.30239999 W

F2 - Processing parameters  
 SI 16384  
 SF 150.9128380 MHz  
 WDW EM  
 SSB 0  
 LB 1.00 Hz  
 GB 0  
 PC 1.40

3-Acetyl-3-(*tert*-butylperoxy)-4-cyclohexylchroman-2-one (1a'): <sup>1</sup>H NMR (CDCl<sub>3</sub>, 400 MHz)

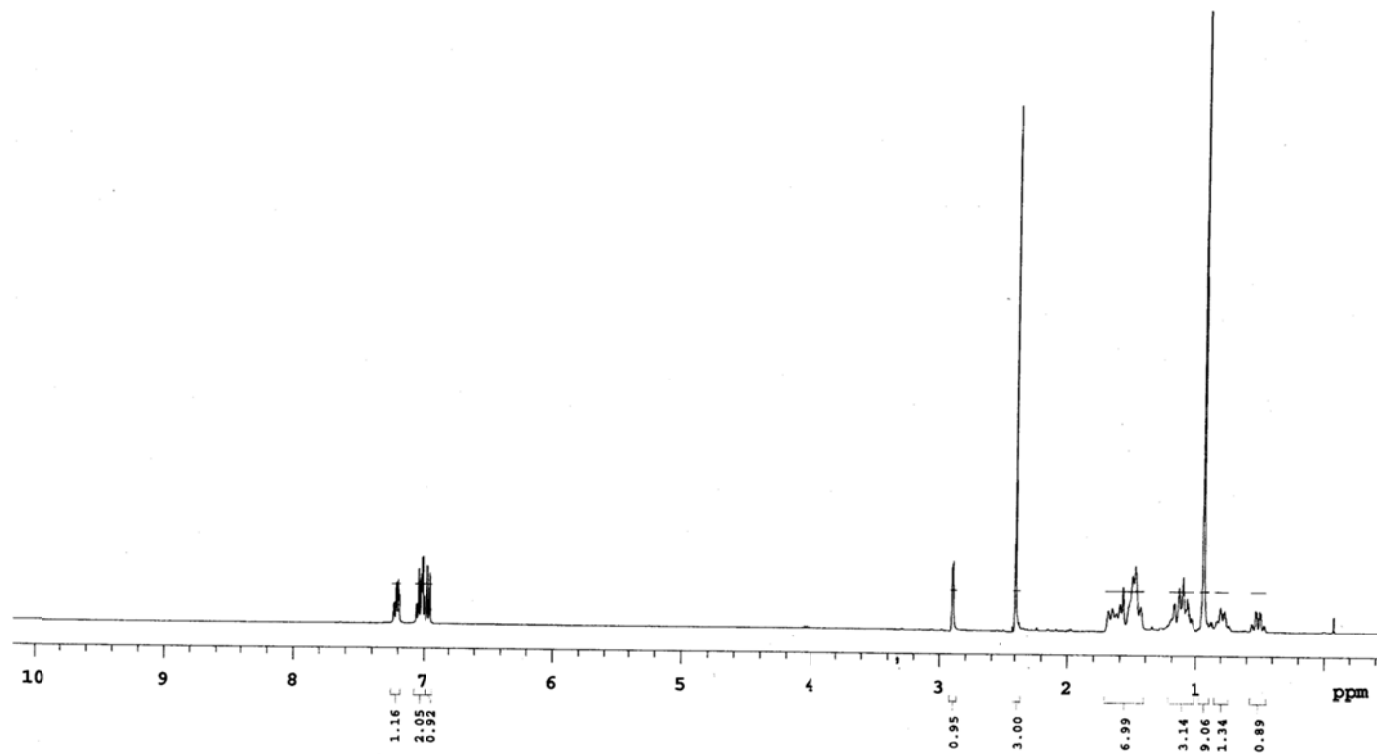

|                                                                                                                                   |                                |                                                                 |                                                                                                                                     |
|-----------------------------------------------------------------------------------------------------------------------------------|--------------------------------|-----------------------------------------------------------------|-------------------------------------------------------------------------------------------------------------------------------------|
| <b>PULSE SEQUENCE</b><br>Relax. delay 1.000 sec<br>Pulse 45.0 degrees<br>Acq. time 2.561 sec<br>Width 6398.0 Hz<br>32 repetitions | <b>OBSERVE</b> H1, 399.8509871 | <b>DATA PROCESSING</b><br>FT size 32768<br>Total time 1 minutes | <b>AB-COMe-CYCLO</b><br>Solvent: cdcl3<br>Temp. 25.0 C / 298.1 K<br>Operator: chem<br>File: AB-COMe-CYCLO<br>Mercury-400 *IITG-NMR* |
|-----------------------------------------------------------------------------------------------------------------------------------|--------------------------------|-----------------------------------------------------------------|-------------------------------------------------------------------------------------------------------------------------------------|

3-Acetyl-3-(*tert*-butylperoxy)-4-cyclohexylchroman-2-one (1a'): <sup>13</sup>C NMR (CDCl<sub>3</sub>, 150 MHz)

AB-COME-CYCLO-13C

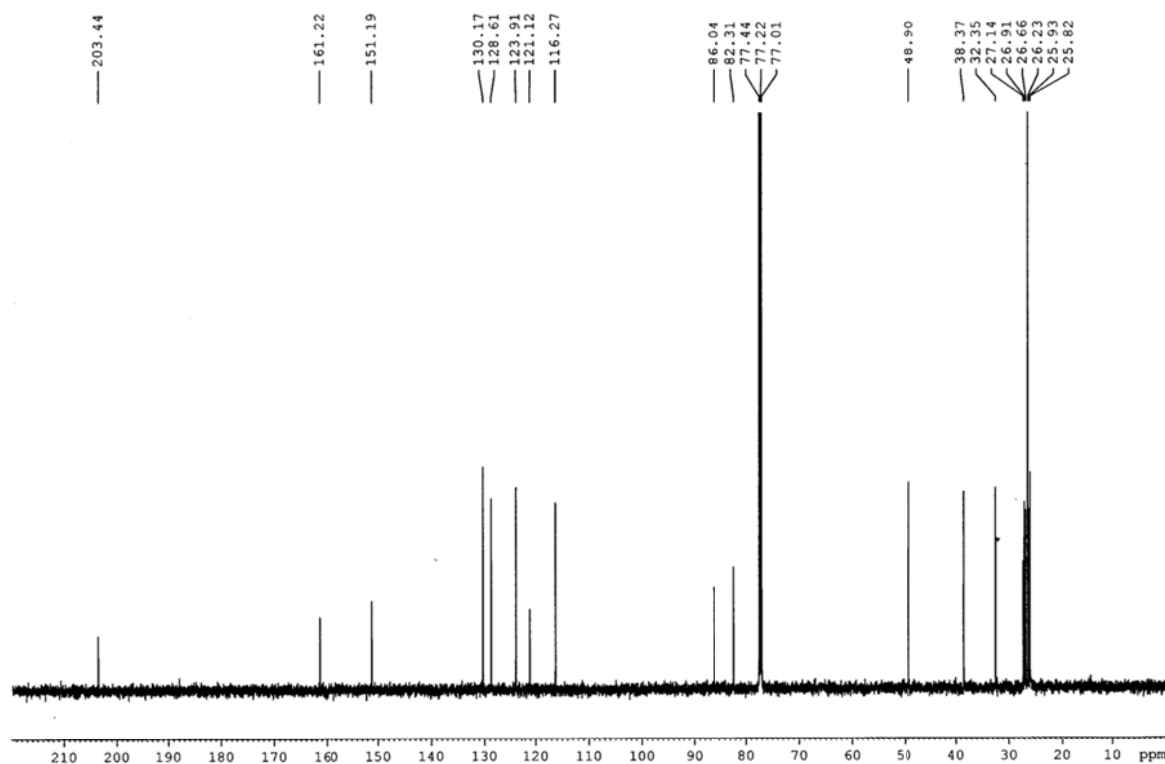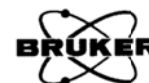

```

Current Data Parameters
NAME      AB-COME-CYCLO-13C
EXPNO     1
PROCNO    1

F2 - Acquisition Parameters
Date_     20140218
Time      13.59
INSTRUM   spect
PROBHD    5 mm PABBO BB/
PULPROG   zgpg30
TD         32768
SOLVENT   CDCl3
NS         206
DS         2
SWH        36057.691 Hz
FIDRES     1.100393 Hz
AQ         0.4543829 sec
RG         65.24
DW         13.867 usec
DE         6.50 usec
TE         300.1 K
D1         2.0000000 sec
D11        0.0300000 sec
TD0        1

----- CHANNEL f1 -----
SFO1      150.9279571 MHz
NUC1       13C
P1         10.50 usec
PLW1       95.0000000 W

----- CHANNEL f2 -----
SFO2      600.1724007 MHz
NUC2       1H
CPDPRG2   waltz16
PCPD2     70.00 usec
PLW2      21.0000000 W
PLW12     0.61714000 W
PLW13     0.30239999 W

F2 - Processing parameters
SI         16384
SF         150.9128363 MHz
WSW        EM
SSB         0
LB          1.00 Hz
GB          0
PC          1.40
    
```

3-Acetyl-3-(*tert*-butylperoxy)-6-chloro-4-cyclohexylchroman-2-one (13a'): <sup>1</sup>H NMR (CDCl<sub>3</sub>, 400 MHz)

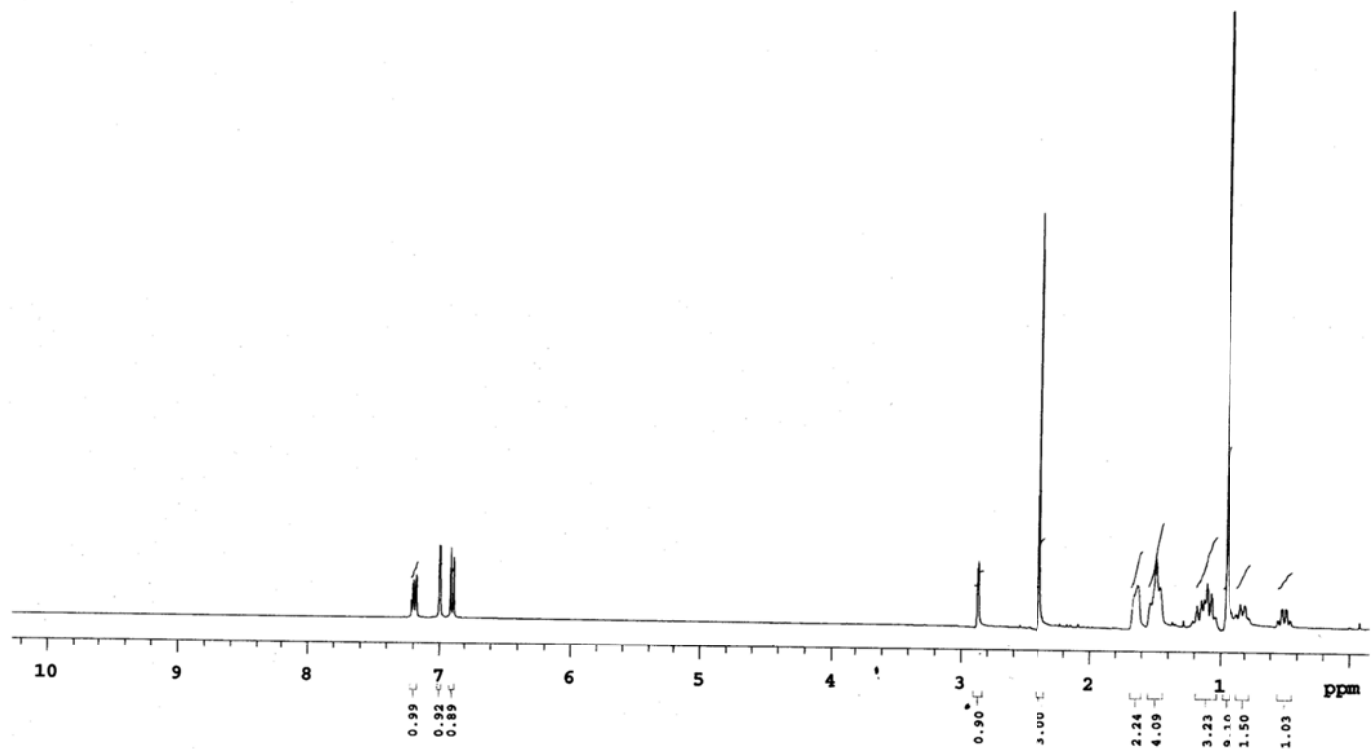

|                                                                                                                                                                                                                                    |                                       |                                                                                                            |                                                                                                                                                                                                                                      |
|------------------------------------------------------------------------------------------------------------------------------------------------------------------------------------------------------------------------------------|---------------------------------------|------------------------------------------------------------------------------------------------------------|--------------------------------------------------------------------------------------------------------------------------------------------------------------------------------------------------------------------------------------|
| <p><b>PULSE SEQUENCE</b><br/>                 Relax. delay 1.000 sec<br/>                 Pulse 45.0 degrees<br/>                 Acq. time 2.561 sec<br/>                 Width 6398.0 Hz<br/>                 32 repetitions</p> | <p><b>OBSERVE</b> H1, 399.8509820</p> | <p><b>DATA PROCESSING</b><br/>                 FT size 32748<br/>                 Total time 1 minutes</p> | <p><b>5_Cl_Cyclo_1H</b><br/>                 Solvent: cdcl3<br/>                 Temp. 25.0 C / 298.1 K<br/>                 Operator: chem<br/>                 File: 5_Cl_Cyclo_1H<br/>                 Mercury-400 "11TG-NMR"</p> |
|------------------------------------------------------------------------------------------------------------------------------------------------------------------------------------------------------------------------------------|---------------------------------------|------------------------------------------------------------------------------------------------------------|--------------------------------------------------------------------------------------------------------------------------------------------------------------------------------------------------------------------------------------|



3-Acetyl-3-(*tert*-butylperoxy)-6-chloro-4-cyclohexylchroman-2-one (13a):  $^{13}\text{C}$  NMR ( $\text{CDCl}_3$ , 100 MHz)

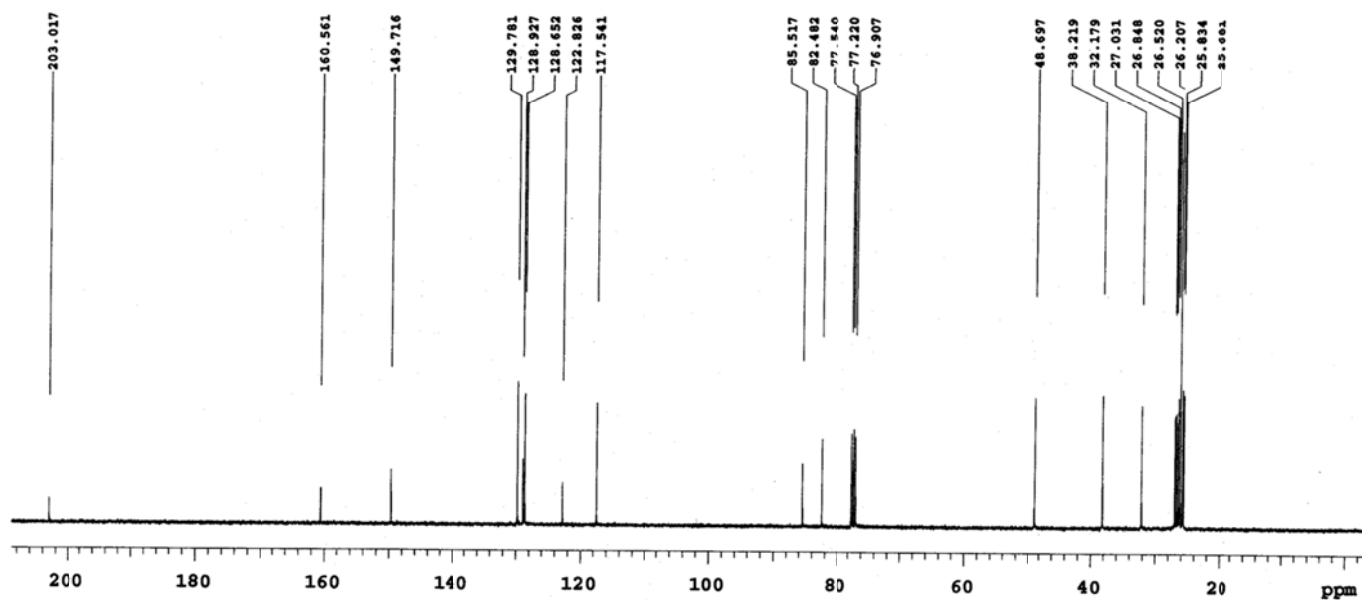

|                                                                                                                                     |                                                                                                                            |                                                                                            |                                                                                                                                       |
|-------------------------------------------------------------------------------------------------------------------------------------|----------------------------------------------------------------------------------------------------------------------------|--------------------------------------------------------------------------------------------|---------------------------------------------------------------------------------------------------------------------------------------|
| <b>PULSE SEQUENCE</b><br>Relax. delay 1.000 sec<br>Pulse 45.0 degrees<br>Acq. time 1.304 sec<br>Width 25125.6 Hz<br>700 repetitions | <b>OBSERVE</b> C13, 100.5425873<br><b>DECOUPLE</b> H1, 399.8529994<br>Power 42 dB<br>continuously on<br>WALTZ-16 modulated | <b>DATA PROCESSING</b><br>Line broadening 0.5 Hz<br>FT size 65536<br>Total time 26 minutes | <b>5_C1_Cyclo_13C</b><br>Solvent: cdcl3<br>Temp. 25.0 C / 298.1 K<br>Operator: chem<br>File: 5_C1_Cyclo_13C<br>Mercury-400 *IITG-NMR* |
|-------------------------------------------------------------------------------------------------------------------------------------|----------------------------------------------------------------------------------------------------------------------------|--------------------------------------------------------------------------------------------|---------------------------------------------------------------------------------------------------------------------------------------|

3-Acetyl-6-bromo-3-(*tert*-butylperoxy)-4-cyclohexylchroman-2-one (14a'): <sup>1</sup>H NMR (CDCl<sub>3</sub>, 400 MHz)

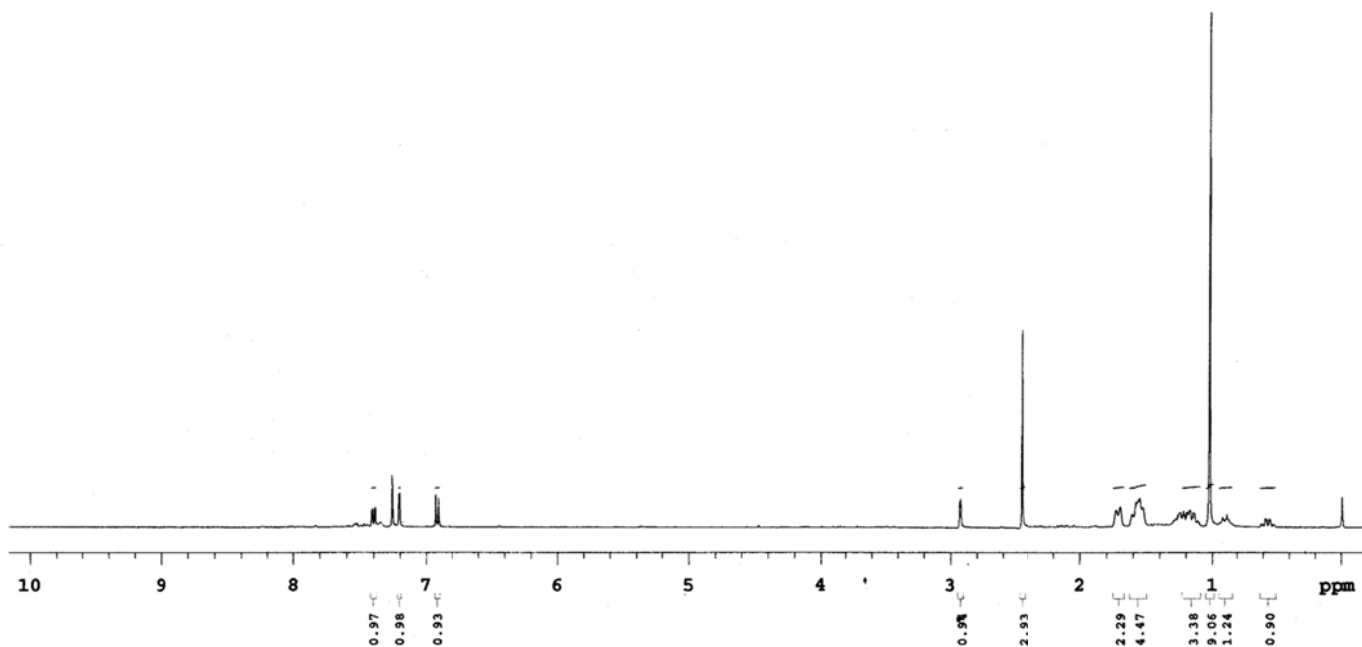

|                                                                                                                                   |                                |                                                                 |                                                                                                                                                    |
|-----------------------------------------------------------------------------------------------------------------------------------|--------------------------------|-----------------------------------------------------------------|----------------------------------------------------------------------------------------------------------------------------------------------------|
| <b>PULSE SEQUENCE</b><br>Relax. delay 1.000 sec<br>Pulse 45.0 degrees<br>Acq. time 2.561 sec<br>Width 6398.0 Hz<br>32 repetitions | <b>OBSERVE</b> H1, 399.8509641 | <b>DATA PROCESSING</b><br>FT size 32768<br>Total time 1 minutes | <b>AB_5_Br_COMe_Cyclo_1H</b><br>Solvent: cdcl3<br>Temp. 25.0 C / 298.1 K<br>Operator: chem<br>File: AB_5_Br_COMe_Cyclo_1H<br>Mercury-400 *ITG-100* |
|-----------------------------------------------------------------------------------------------------------------------------------|--------------------------------|-----------------------------------------------------------------|----------------------------------------------------------------------------------------------------------------------------------------------------|

3-Acetyl-6-bromo-3-(*tert*-butylperoxy)-4-cyclohexylchroman-2-one (14a'): <sup>13</sup>C NMR (CDCl<sub>3</sub>, 150 MHz)

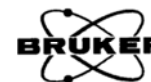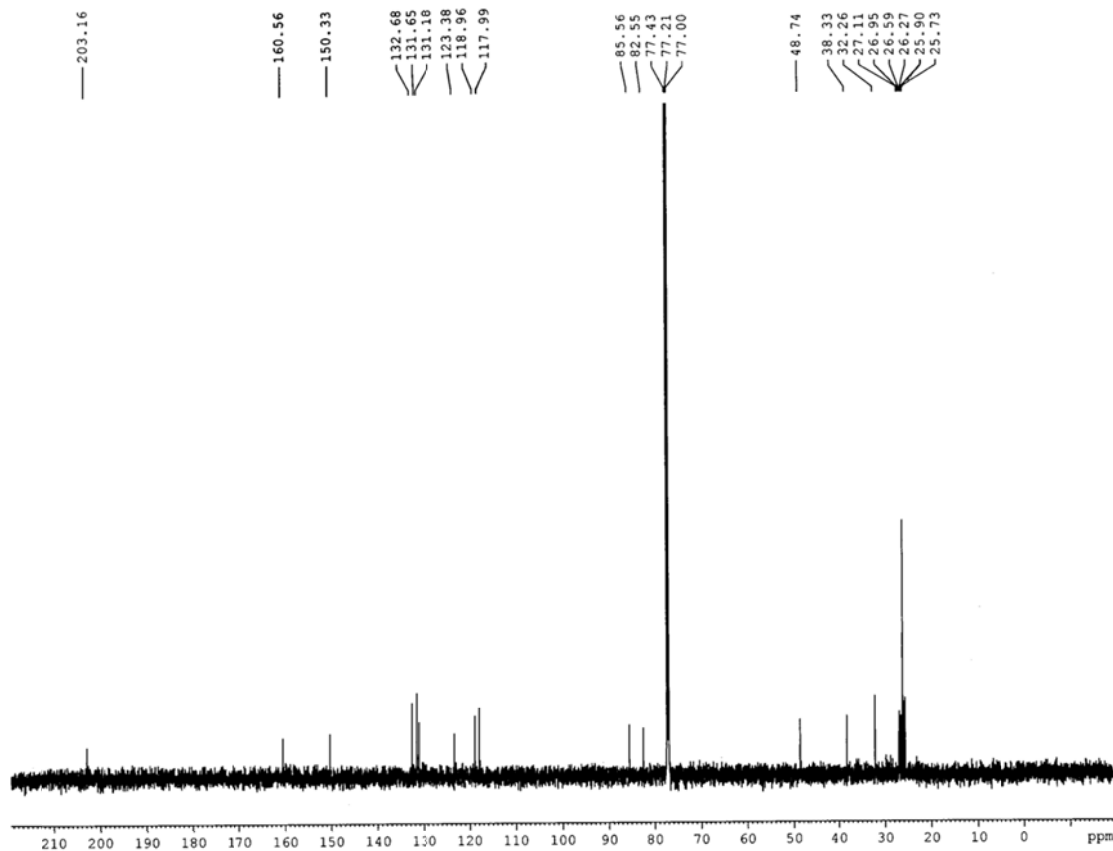

```

Current Data Parameters
NAME      AB-5BR-CYCLO1-13C
EXPNO     1
PROCNO    1

F2 - Acquisition Parameters
Date_     20141028
Time      15.13
INSTRUM   spect
PROBHD    5 mm PABBO BB/
PULPROG   zgpg30
TD         32768
SOLVENT   CDCl3
NS         426
DS         2
SWH        36057.691 Hz
FIDRES     1.100393 Hz
AQ         0.4543829 sec
RG         65.24
DW         13.987 usec
DE         6.50 usec
TE         298.8 K
D1         2.00000000 sec
D11        0.03000000 sec
TDO        1

----- CHANNEL f1 -----
SF01      150.9279571 MHz
NUC1       13C
P1         10.50 usec
PLW1       95.00000000 W

----- CHANNEL f2 -----
SF02      600.1724007 MHz
NUC2       1H
CPDPRG2    waltz16
PCPD2      70.00 usec
PLW2       21.00000000 W
PLW12      0.61714000 W
PLW13      0.30239999 W

F2 - Processing parameters
S1         16384
SF         150.9128362 MHz
WDW        EM
SSB        0
LB         1.00 Hz
GB         0
PC         1.40
    
```

3-Acetyl-3-(*tert*-butylperoxy)-4-cyclohexyl-6-nitrochroman-2-one (5a'): <sup>1</sup>H NMR (CDCl<sub>3</sub>, 400 MHz)

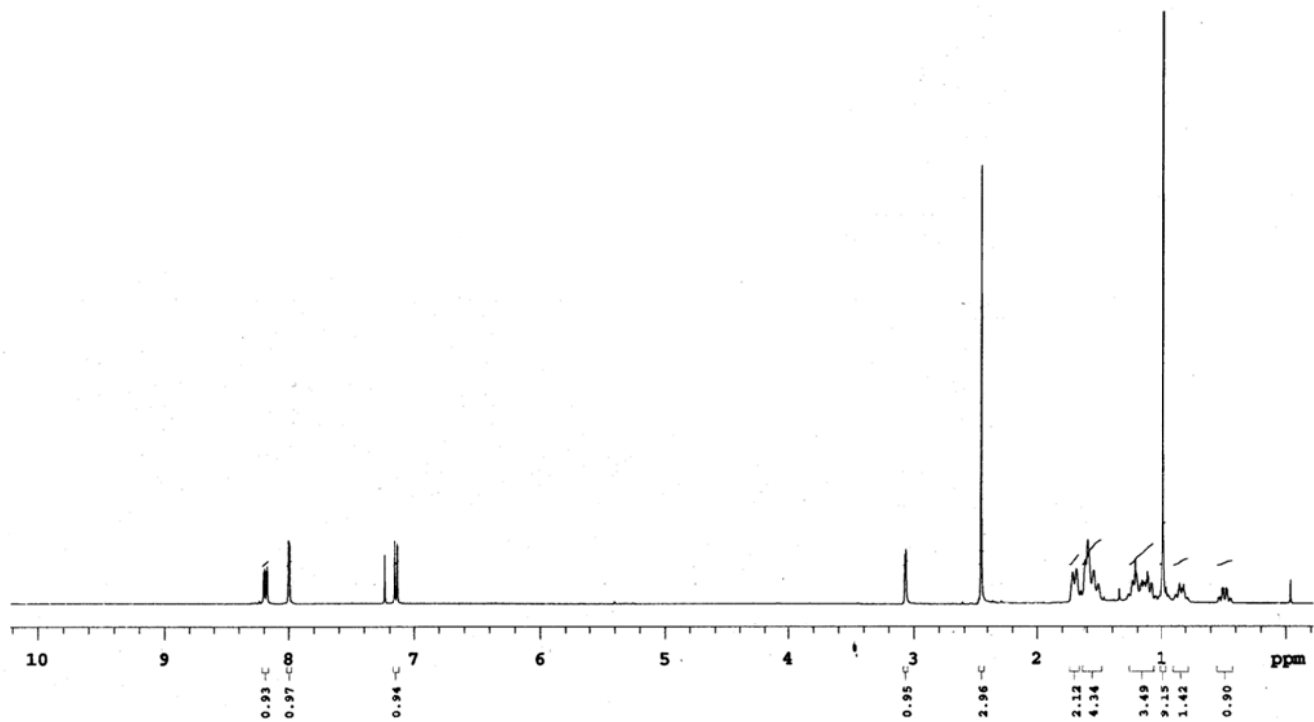

|                                                                                                                                   |                                |                                                                 |                                                                                                                                               |
|-----------------------------------------------------------------------------------------------------------------------------------|--------------------------------|-----------------------------------------------------------------|-----------------------------------------------------------------------------------------------------------------------------------------------|
| <b>PULSE SEQUENCE</b><br>Relax. delay 1.000 sec<br>Pulse 45.0 degrees<br>Acq. time 2.561 sec<br>Width 6396.0 Hz<br>32 repetitions | <b>OBSERVE</b> H1, 399.8509721 | <b>DATA PROCESSING</b><br>FT size 32768<br>Total time 1 minutes | <b>AB-5-Me2COMe-Cyclo</b><br>Solvent: cdcl3<br>Temp. 25.0 C / 298.1 K<br>Operator: chem<br>File: AB-5-Me2COMe-Cyclo<br>Mercury-400 "IITG-NMR" |
|-----------------------------------------------------------------------------------------------------------------------------------|--------------------------------|-----------------------------------------------------------------|-----------------------------------------------------------------------------------------------------------------------------------------------|

3-Acetyl-3-(*tert*-butylperoxy)-4-cyclohexyl-6-nitrochroman-2-one (5a'): <sup>13</sup>C NMR (CDCl<sub>3</sub>, 100 MHz)

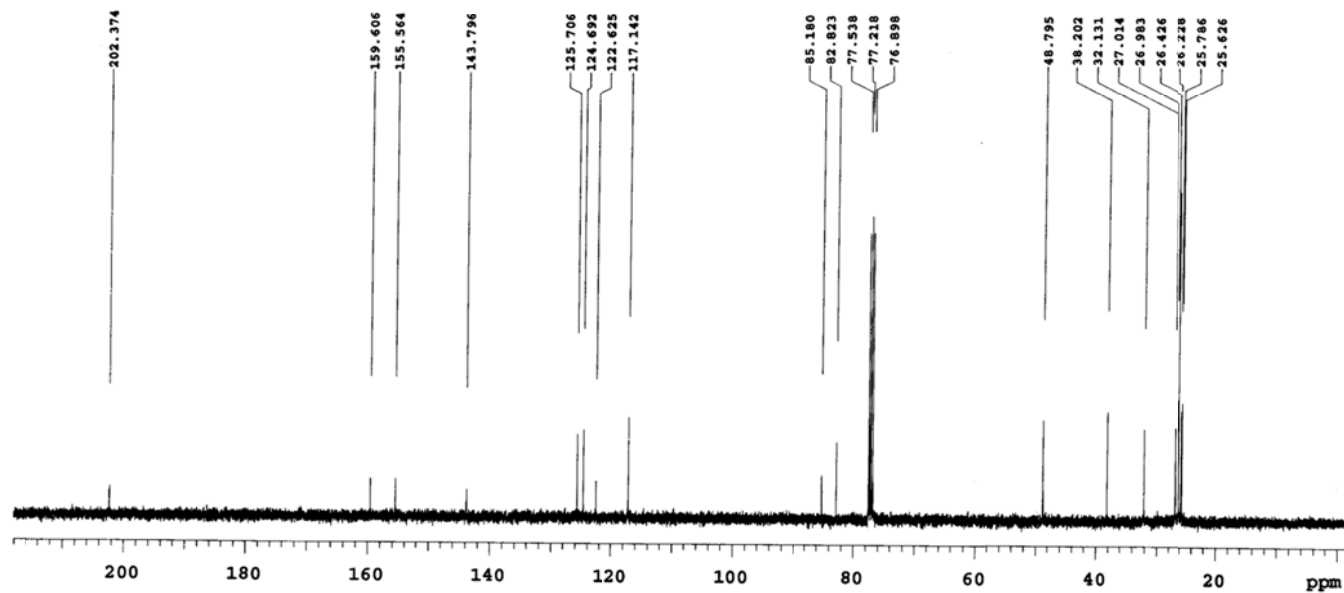

|                                                                                                                                     |                                                                                                                            |                                                                                            |                                                                                                                                               |
|-------------------------------------------------------------------------------------------------------------------------------------|----------------------------------------------------------------------------------------------------------------------------|--------------------------------------------------------------------------------------------|-----------------------------------------------------------------------------------------------------------------------------------------------|
| <b>PULSE SEQUENCE</b><br>Relax. delay 1.000 sec<br>Pulse 45.0 degrees<br>Acq. time 1.304 sec<br>Width 25125.6 Hz<br>160 repetitions | <b>OBSERVE</b> C13, 100.5425852<br><b>DECOUPLE</b> H1, 399.8529994<br>Power 42 dB<br>continuously on<br>WALTZ-16 modulated | <b>DATA PROCESSING</b><br>Line broadening 0.5 Hz<br>FT size 65536<br>Total time 17 minutes | <b>SS-AB-5NO2-C-13C</b><br><br>Solvent: cdcl3<br>Temp. 25.0 C / 298.1 K<br>Operator: chem<br>File: SS-AB-5NO2-C-13C<br>Mercury-400 *IITG-NMR* |
|-------------------------------------------------------------------------------------------------------------------------------------|----------------------------------------------------------------------------------------------------------------------------|--------------------------------------------------------------------------------------------|-----------------------------------------------------------------------------------------------------------------------------------------------|

3-Acetyl-3-(*tert*-butylperoxy)-6,8-dichloro-4-cyclohexylchroman-2-one (6a'): <sup>1</sup>H NMR (CDCl<sub>3</sub>, 400 MHz)

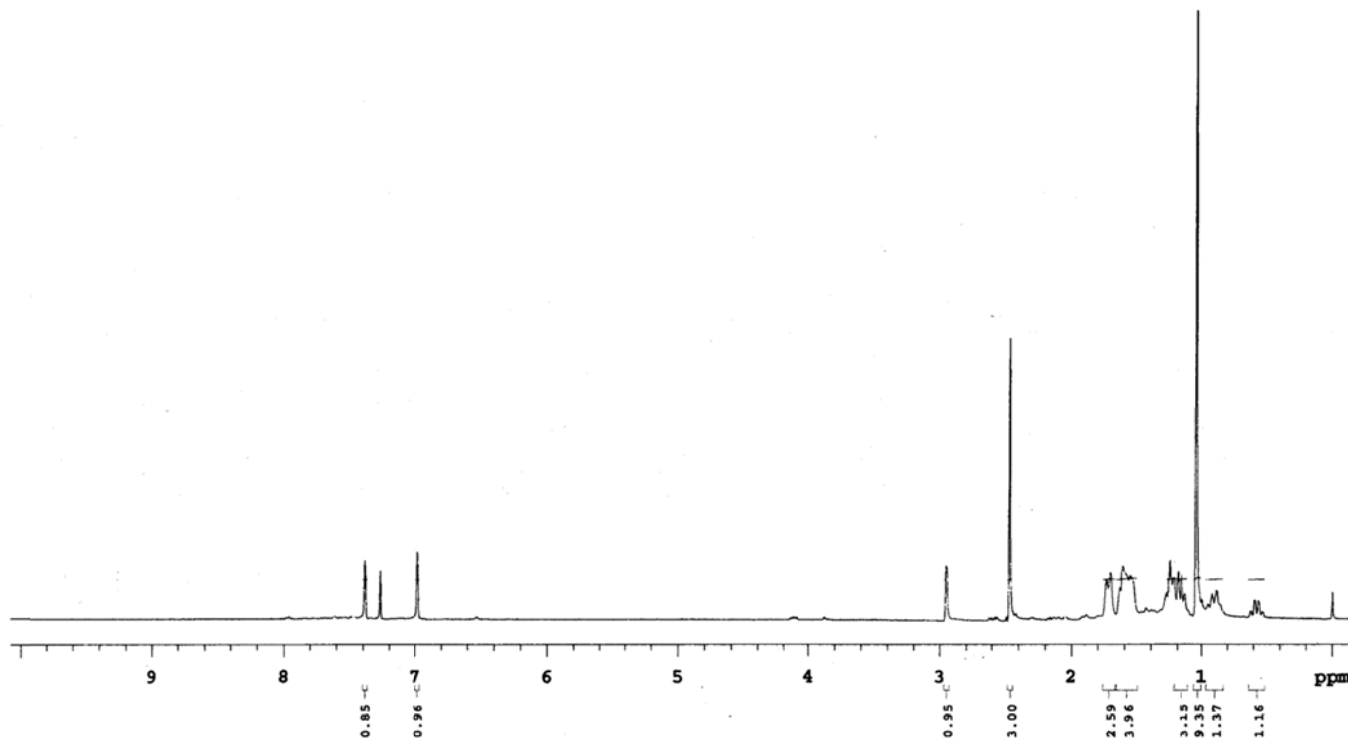

|                                                                                                                                   |                                |                                                                 |                                                                                                                              |
|-----------------------------------------------------------------------------------------------------------------------------------|--------------------------------|-----------------------------------------------------------------|------------------------------------------------------------------------------------------------------------------------------|
| <b>PULSE SEQUENCE</b><br>Relax. delay 1.000 sec<br>Pulse 45.0 degrees<br>Acq. time 2.561 sec<br>Width 6398.0 Hz<br>32 repetitions | <b>OBSERVE</b> H1, 399.8509613 | <b>DATA PROCESSING</b><br>FT size 32768<br>Total time 1 minutes | <b>AB-68Cl-1H</b><br>Solvent: cdcl3<br>Temp. 25.0 C / 298.1 K<br>Operator: chem<br>File: AB-68Cl-1H<br>Mercury-400 *ITG-MGR* |
|-----------------------------------------------------------------------------------------------------------------------------------|--------------------------------|-----------------------------------------------------------------|------------------------------------------------------------------------------------------------------------------------------|

3-Acetyl-3-(*tert*-butylperoxy)-6,8-dichloro-4-cyclohexylchroman-2-one (6a'): <sup>13</sup>C NMR (CDCl<sub>3</sub>, 100 MHz)

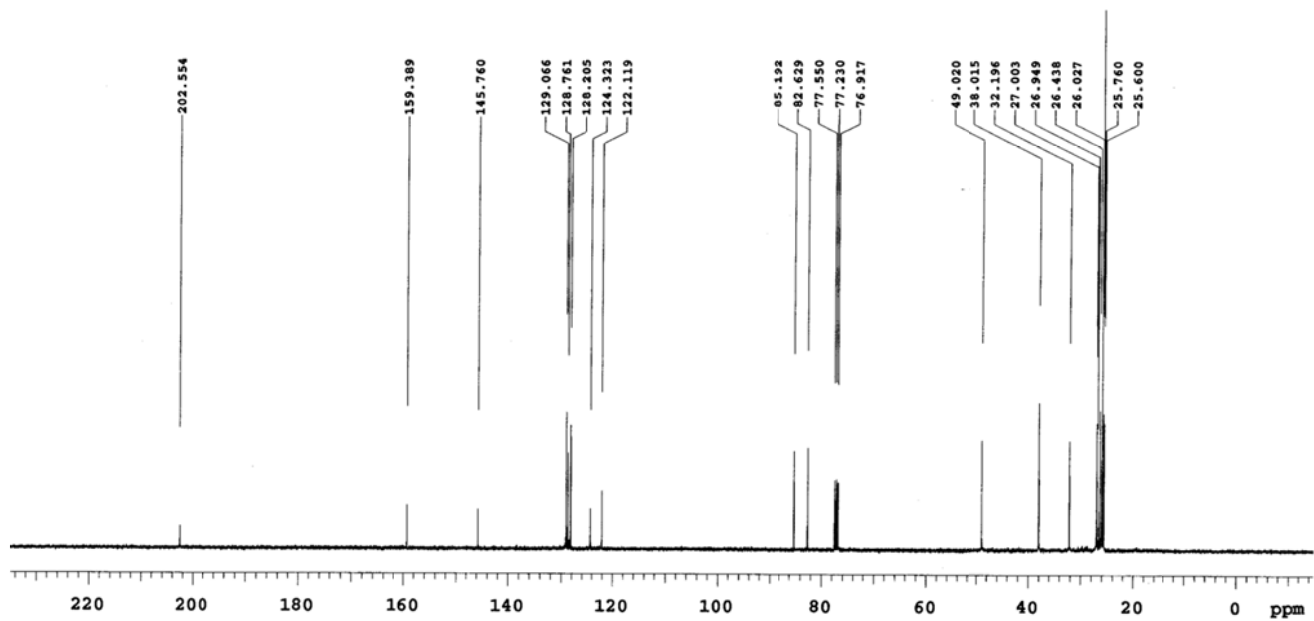

|                                                                                                                                                                                                                                      |                                                                                                                                                                                           |                                                                                                                                                         |                                                                                                                                                                                                                                           |
|--------------------------------------------------------------------------------------------------------------------------------------------------------------------------------------------------------------------------------------|-------------------------------------------------------------------------------------------------------------------------------------------------------------------------------------------|---------------------------------------------------------------------------------------------------------------------------------------------------------|-------------------------------------------------------------------------------------------------------------------------------------------------------------------------------------------------------------------------------------------|
| <p><b>PULSE SEQUENCE</b><br/>                 Relax. delay 1.000 sec<br/>                 Pulse 45.0 degrees<br/>                 Acq. time 1.304 sec<br/>                 Width 25125.6 Hz<br/>                 320 repetitions</p> | <p><b>OBSERVE</b> C13, 100.5425909<br/> <b>DECOUPLE</b> H1, 199.8529994<br/>                 Power 42 dB<br/>                 continuously on<br/>                 WALTZ-16 modulated</p> | <p><b>DATA PROCESSING</b><br/>                 Line broadening 0.5 Hz<br/>                 FT size 65536<br/>                 Total time 12 minutes</p> | <p>AB-35ClCyclo_U2_13C<br/>                 Solvent: cdcl3<br/>                 Temp. 25.0 C / 298.1 K<br/>                 Operator: chem<br/>                 File: AB-35ClCyclo_U2_13C<br/>                 Mercury-400 *IITG-NMR*</p> |
|--------------------------------------------------------------------------------------------------------------------------------------------------------------------------------------------------------------------------------------|-------------------------------------------------------------------------------------------------------------------------------------------------------------------------------------------|---------------------------------------------------------------------------------------------------------------------------------------------------------|-------------------------------------------------------------------------------------------------------------------------------------------------------------------------------------------------------------------------------------------|

3-Acetyl-6,8-dibromo-3-(*tert*-butylperoxy)-4-cyclohexylchroman-2-one (7a'):  $^1\text{H}$  NMR ( $\text{CDCl}_3$ , 400 MHz)

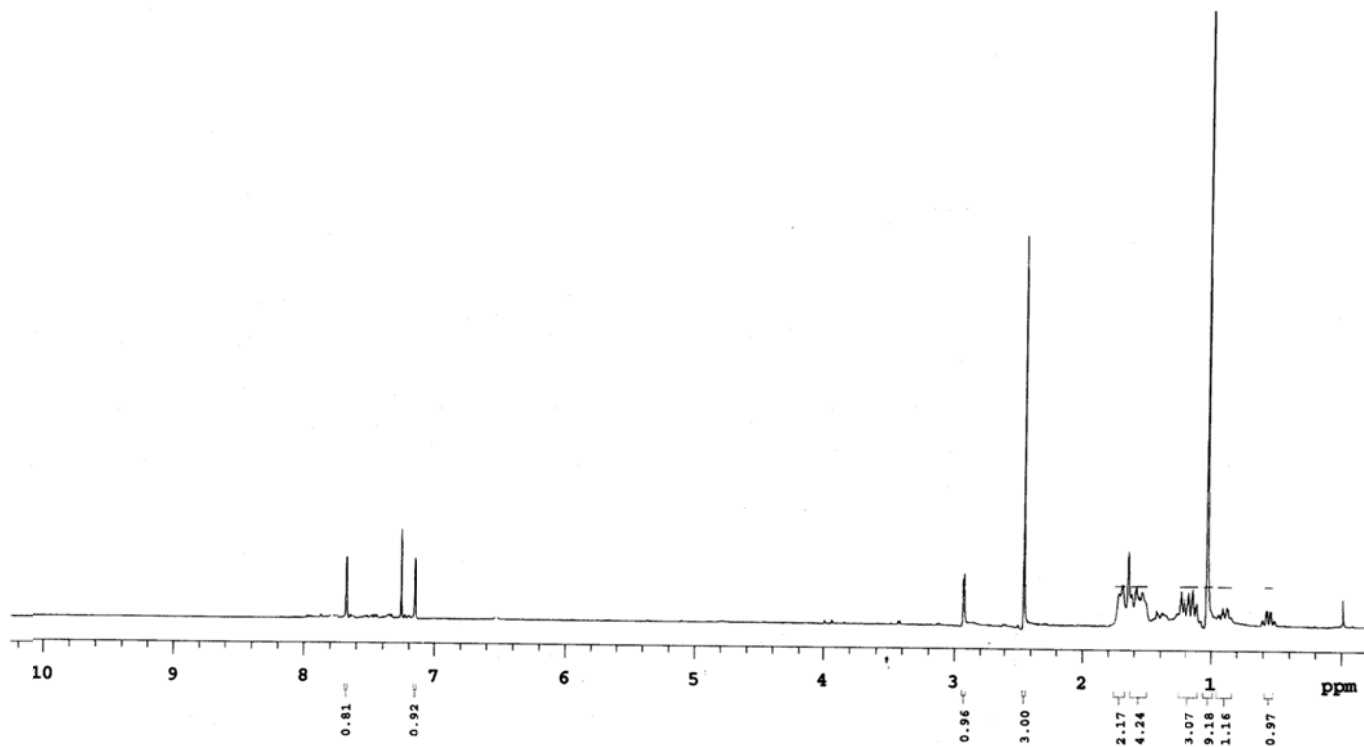

|                                                                                                                                   |                                |                                                                 |                                                                                                                                                 |
|-----------------------------------------------------------------------------------------------------------------------------------|--------------------------------|-----------------------------------------------------------------|-------------------------------------------------------------------------------------------------------------------------------------------------|
| <b>PULSE SEQUENCE</b><br>Relax. delay 1.000 sec<br>Pulse 45.0 degrees<br>Acq. time 2.561 sec<br>Width 6398.0 Hz<br>32 repetitions | <b>OBSERVE</b> H1, 399.8509640 | <b>DATA PROCESSING</b><br>FT size 32768<br>Total time 1 minutes | <b>AB-Di_Br_COMe_1H</b><br>Solvent: cdcl3<br>Temp. 25.0 C / 298.1 K<br>Operator: chem<br>File: AB-Di_Br_COMe_cyclo_1H<br>Mercury-400 *IITG-NMR* |
|-----------------------------------------------------------------------------------------------------------------------------------|--------------------------------|-----------------------------------------------------------------|-------------------------------------------------------------------------------------------------------------------------------------------------|



3-Acetyl-6,8-dibromo-3-(*tert*-butylperoxy)-4-cyclohexylchroman-2-one (7a'): <sup>13</sup>C NMR (CDCl<sub>3</sub>, 100 MHz)

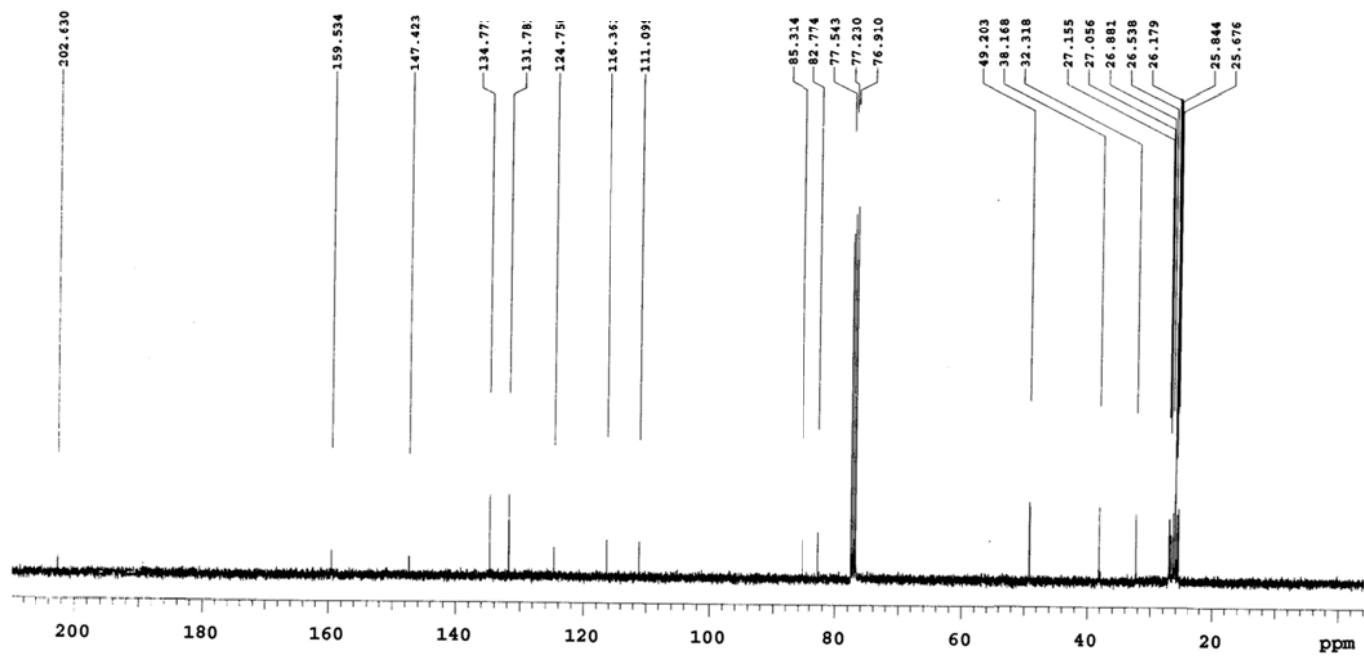

|                                                                                                                                          |                                                                                                                         |                                                                                               |                                                                                                                                                                   |
|------------------------------------------------------------------------------------------------------------------------------------------|-------------------------------------------------------------------------------------------------------------------------|-----------------------------------------------------------------------------------------------|-------------------------------------------------------------------------------------------------------------------------------------------------------------------|
| <p>PULSE SEQUENCE<br/>Relax. delay 1.000 sec<br/>Pulse 45.0 degrees<br/>Acq. time 1.304 sec<br/>Width 25125.6 Hz<br/>940 repetitions</p> | <p>OBSERVE C13, 100.5425840<br/>DECOUPLE H1, 399.8529994<br/>Power 42 dB<br/>continuously on<br/>WALTZ-16 modulated</p> | <p>DATA PROCESSING<br/>Line broadening 0.5 Hz<br/>FT size 65536<br/>Total time 36 minutes</p> | <p>AB-Di_Br_COMe_Cyclo_13C<br/><br/>Solvent: cdcl3<br/>Temp. 25.0 C / 298.1 K<br/>Operator: chem<br/>File: AB-Di_Br_COMe_cyclo_13C<br/>Mercury-400 *IITG-NMR*</p> |
|------------------------------------------------------------------------------------------------------------------------------------------|-------------------------------------------------------------------------------------------------------------------------|-----------------------------------------------------------------------------------------------|-------------------------------------------------------------------------------------------------------------------------------------------------------------------|

3-Acetyl-3-(*tert*-butylperoxy)-4-cyclohexyl-7-methoxychroman-2-one (2a'): <sup>1</sup>H NMR (CDCl<sub>3</sub>, 600 MHz)

AB-4OMe-COMe-1H

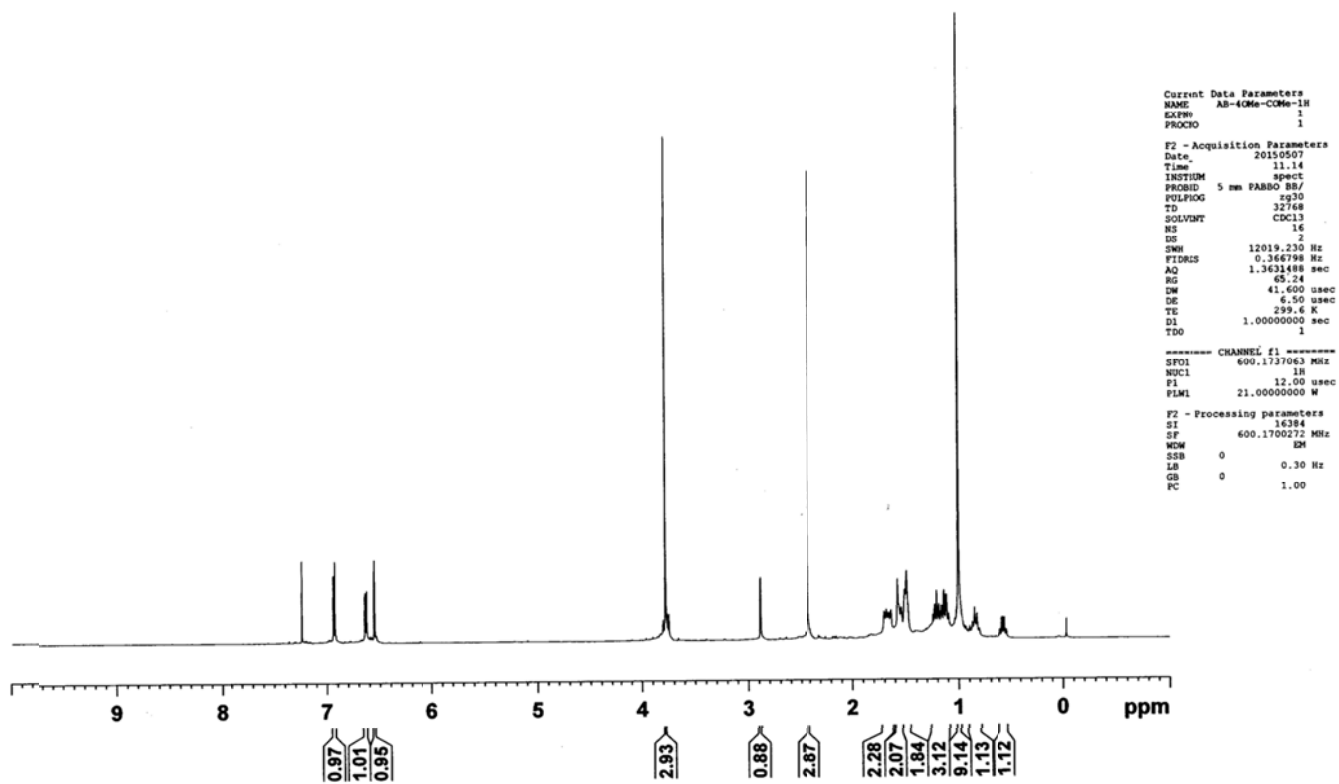

3-Acetyl-3-(*tert*-butylperoxy)-4-cyclohexyl-7-methoxychroman-2-one (2a'):  $^{13}\text{C}$  NMR ( $\text{CDCl}_3$ , 150 MHz)

AB-4OMe-COMe-13C

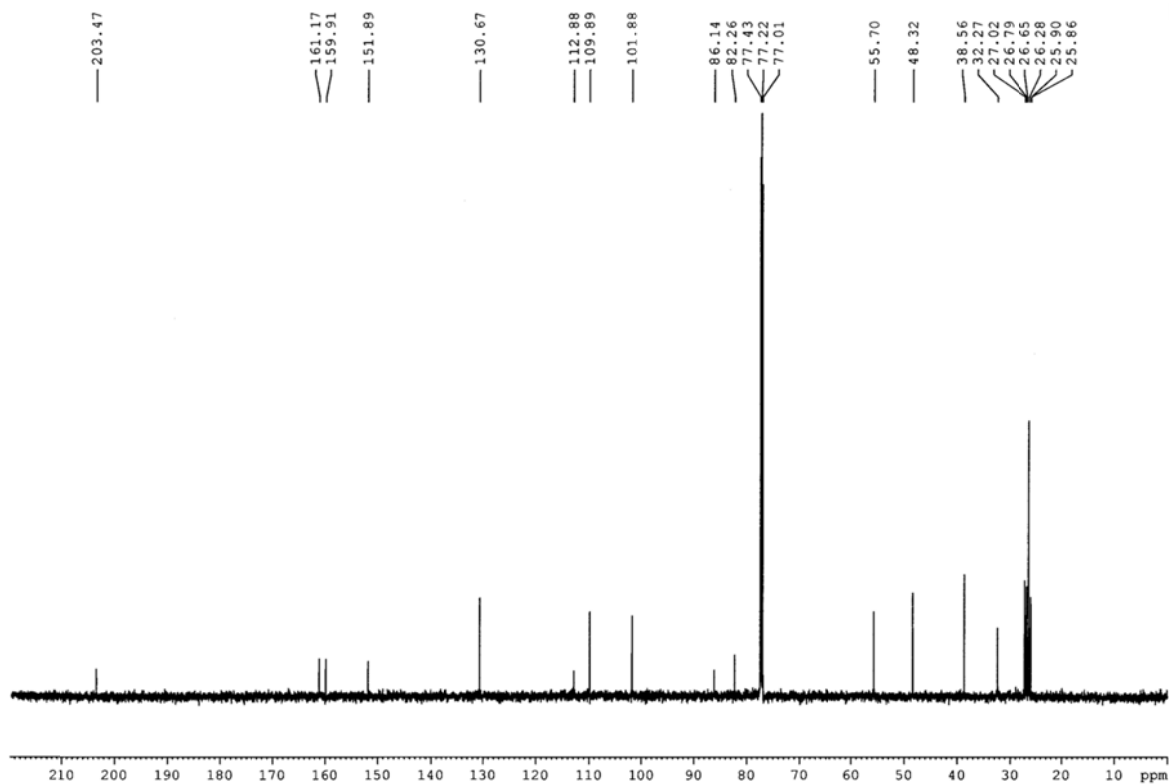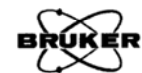

```

Current Data Parameters
NAME      AB-4OMe-COMe-13C
EXPNO    1
PROCNO   1

F2 - Acquisition Parameters
Date_    20150507
Time     11.04
INSTRUM spect
PROBHD   5 mm PABBO BB/
PULPROG zgpg30
TD       32768
SOLVENT  CDCl3
NS       149
DS       2
SWH      36057.691 Hz
FIDRES   1.100393 Hz
AQ       0.4543829 sec
RG       65.2<
DM       13.867 usec
DE       6.50 usec
TE       299.8 K
D1       2.0000000 sec
D11      0.0300000 sec
TDO      1

----- CHANNEL f1 -----
SF01     150.9279571 MHz
NUC1     13C
P1       10.50 usec
PLM1     95.0000000 W

----- CHANNEL f2 -----
SF02     600.1324007 MHz
NUC2     1H
CPDPRG2 waltz16
PCPD2    70.00 usec
PLM2     21.0000000 W
PLM12    0.61714000 W
PLM13    0.30239999 W

F2 - Processing parameters
SI       16384
SF       150.9128363 MHz
WDW      EM
SSB      0
LB       1.00 Hz
GB       0
PC       1.40
    
```

3-Acetyl-3-(*tert*-butylperoxy)-4-cyclohexyl-8-methoxychroman-2-one (15a'):  $^1\text{H}$  NMR ( $\text{CDCl}_3$ , 600 MHz)

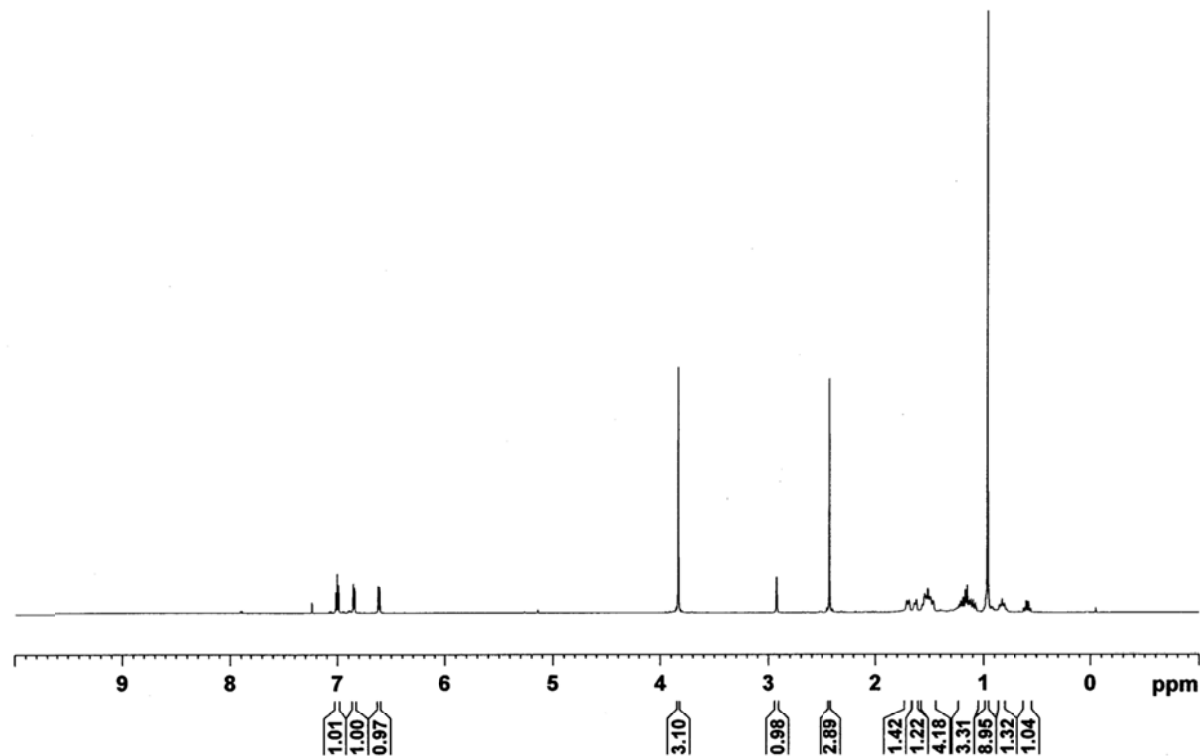

```
Current Data Parameters
NAME      AB-3-One-cyclo_1H
EXPNO     1
PROCNO    1

F2 - Acquisition Parameters
Date_     20150124
Time      15.41
INSTRUM   spect
PROBHD    5 mm PABBO BB/
PULPROG   zg30
TD         32768
SOLVENT   CDCl3
NS         16
DS         2
SFO1      12019.230 Hz
FIDRES    0.366798 Hz
AQ         1.3631488 sec
RG         22.18
DM         41.600 usec
DE         6.50 usec
TE         298.4 K
EI         1.00000000 sec
TDO        1

===== CHANNEL f1 =====
SFO1      600.1737063 MHz
NUC1       1H
P1         12.00 usec
PLW1       21.00000000 W

F2 - Processing parameters
SI         16384
SF         600.1700272 MHz
WDW        EM
SSB        0
LB         0.30 Hz
GB         0
PC         1.00
```

3-Acetyl-3-(*tert*-butylperoxy)-4-cyclohexyl-8-methoxychoman-2-one (15a'): <sup>13</sup>C NMR (CDCl<sub>3</sub>, 150 MHz)

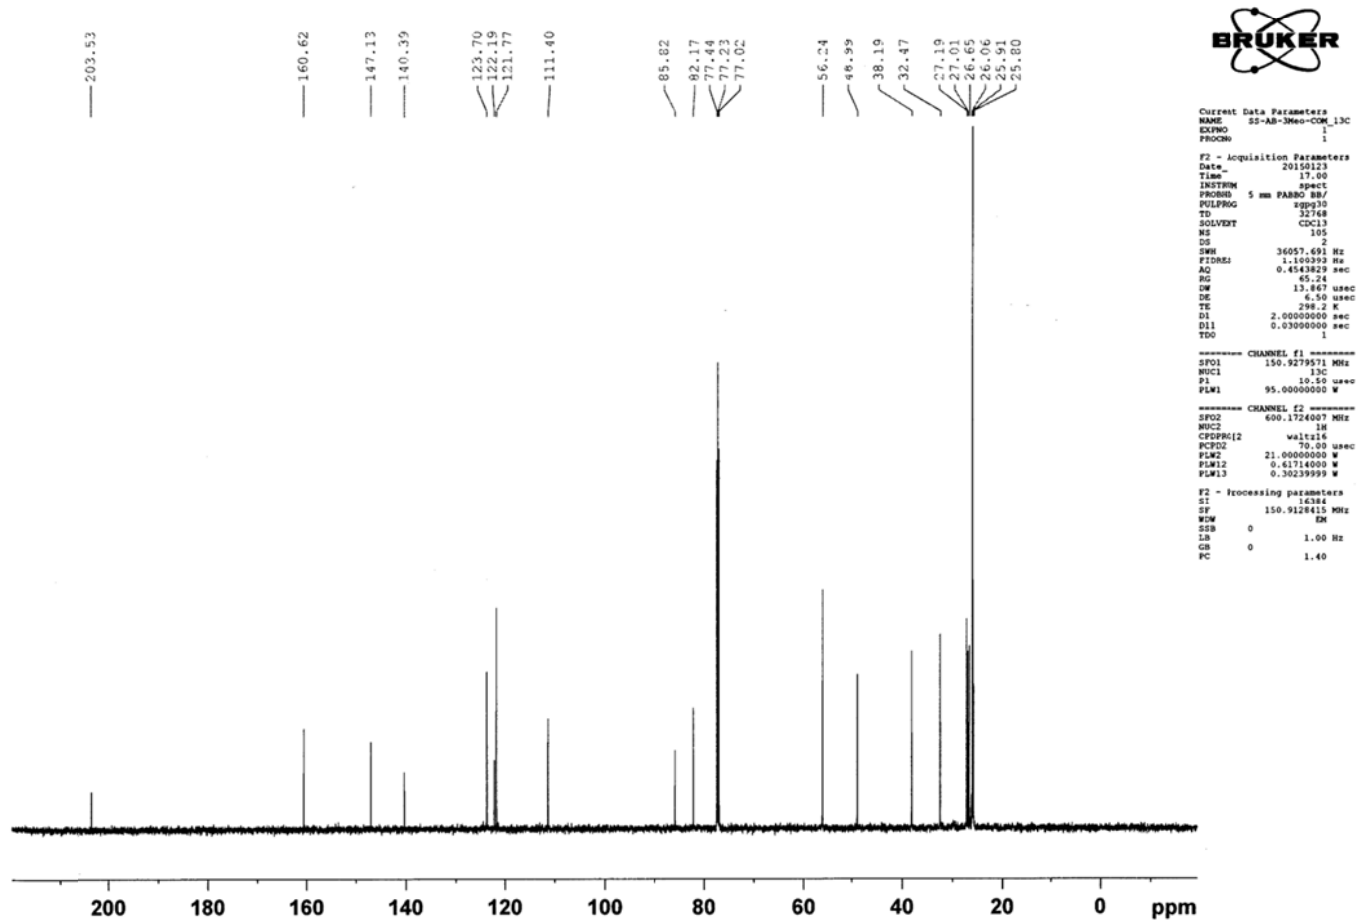

2-Acetyl-2-(*tert*-butylperoxy)-1-cyclohexyl-1H-benzo[*f*]chromen-3(2H)-one (8a'): <sup>1</sup>H NMR (CDCl<sub>3</sub>, 400 MHz)

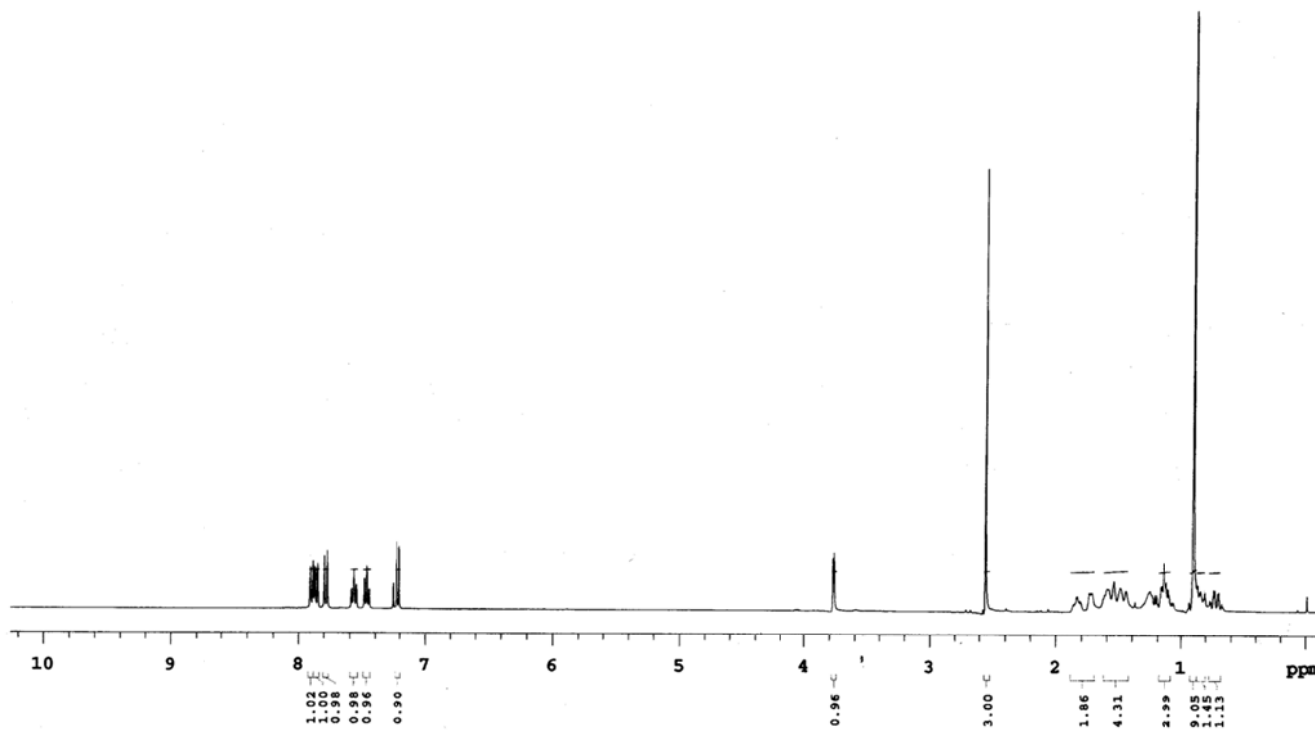

|                                                                                                                                   |                                |                                                                 |                                                                                                                          |
|-----------------------------------------------------------------------------------------------------------------------------------|--------------------------------|-----------------------------------------------------------------|--------------------------------------------------------------------------------------------------------------------------|
| <b>PULSE SEQUENCE</b><br>Relax. delay 1.000 sec<br>Pulse 45.0 degrees<br>Acq. time 2.561 sec<br>Width 6398.0 Hz<br>32 repetitions | <b>OBSERVE</b> H1, 399.8509641 | <b>DATA PROCESSING</b><br>FT size 32768<br>Total time 1 minutes | nap_cyclo_1H<br>Solvent: cdcl3<br>Temp. 25.0 C / 298.1 K<br>Operator: chem<br>File: nap_cyclo_1H<br>Mercury-400 "1H-NMR" |
|-----------------------------------------------------------------------------------------------------------------------------------|--------------------------------|-----------------------------------------------------------------|--------------------------------------------------------------------------------------------------------------------------|

2-Acetyl-2-(*tert*-butylperoxy)-1-cyclohexyl-1H-benzo[*f*]chromen-3(2H)-one (8a'): <sup>13</sup>C NMR (CDCl<sub>3</sub>, 100 MHz)

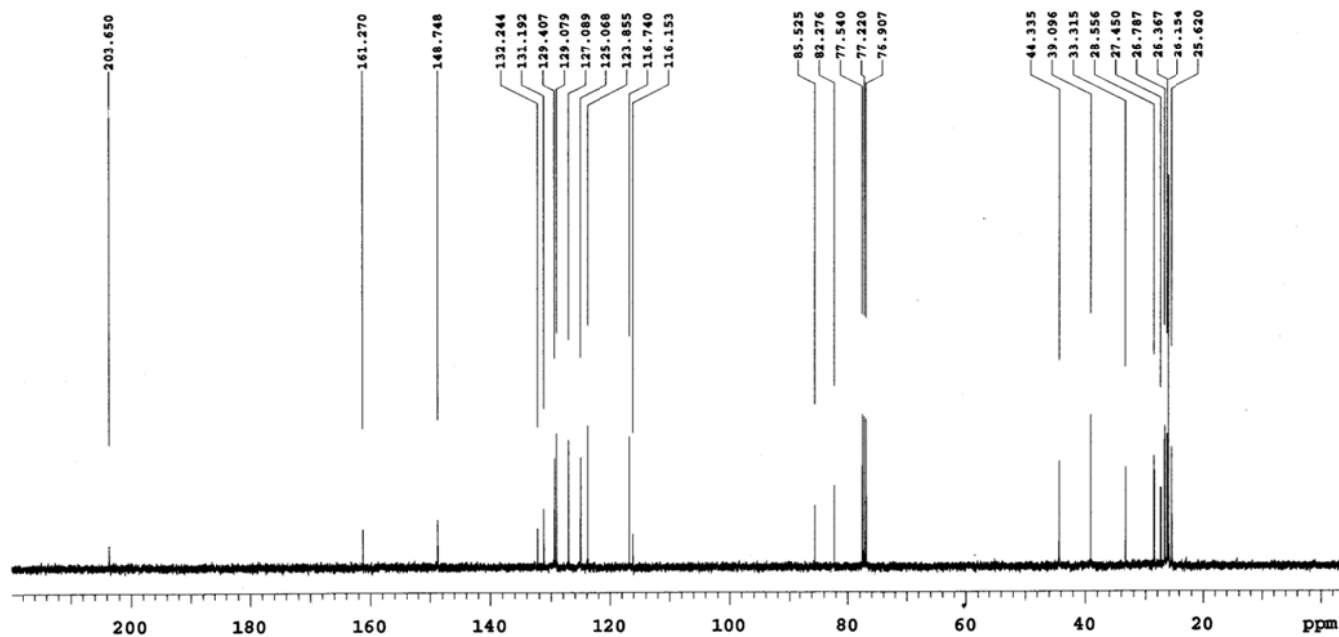

|                                                                                                                                                                                                                                      |                                                                                                                                                                                           |                                                                                                                                                         |                                                                                                                                                                                                                               |
|--------------------------------------------------------------------------------------------------------------------------------------------------------------------------------------------------------------------------------------|-------------------------------------------------------------------------------------------------------------------------------------------------------------------------------------------|---------------------------------------------------------------------------------------------------------------------------------------------------------|-------------------------------------------------------------------------------------------------------------------------------------------------------------------------------------------------------------------------------|
| <p><b>PULSE SEQUENCE</b><br/>                 Relax. delay 1.000 sec<br/>                 Pulse 45.0 degrees<br/>                 Acq. time 1.304 sec<br/>                 Width 25125.6 Hz<br/>                 350 repetitions</p> | <p><b>OBSERVE</b> C13, 100.5425865<br/> <b>DECOUPLE</b> H1, 399.8529994<br/>                 Power 42 dB<br/>                 continuously on<br/>                 WALTZ-16 modulated</p> | <p><b>DATA PROCESSING</b><br/>                 Line broadening 0.5 Hz<br/>                 FT size 65536<br/>                 Total time 13 minutes</p> | <p>nap_cyclo_13C<br/>                 Solvent: cdcl3<br/>                 Temp. 25.0 C / 298.1 K<br/>                 Operator: chem<br/>                 File: nap_cyclo_13C<br/>                 Mercury-400 *IITG-NMR*</p> |
|--------------------------------------------------------------------------------------------------------------------------------------------------------------------------------------------------------------------------------------|-------------------------------------------------------------------------------------------------------------------------------------------------------------------------------------------|---------------------------------------------------------------------------------------------------------------------------------------------------------|-------------------------------------------------------------------------------------------------------------------------------------------------------------------------------------------------------------------------------|

3-Acetyl-3-(*tert*-butylperoxy)-4-cyclopentylchroman-2-one (1b'): <sup>1</sup>H NMR (CDCl<sub>3</sub>, 400 MHz)

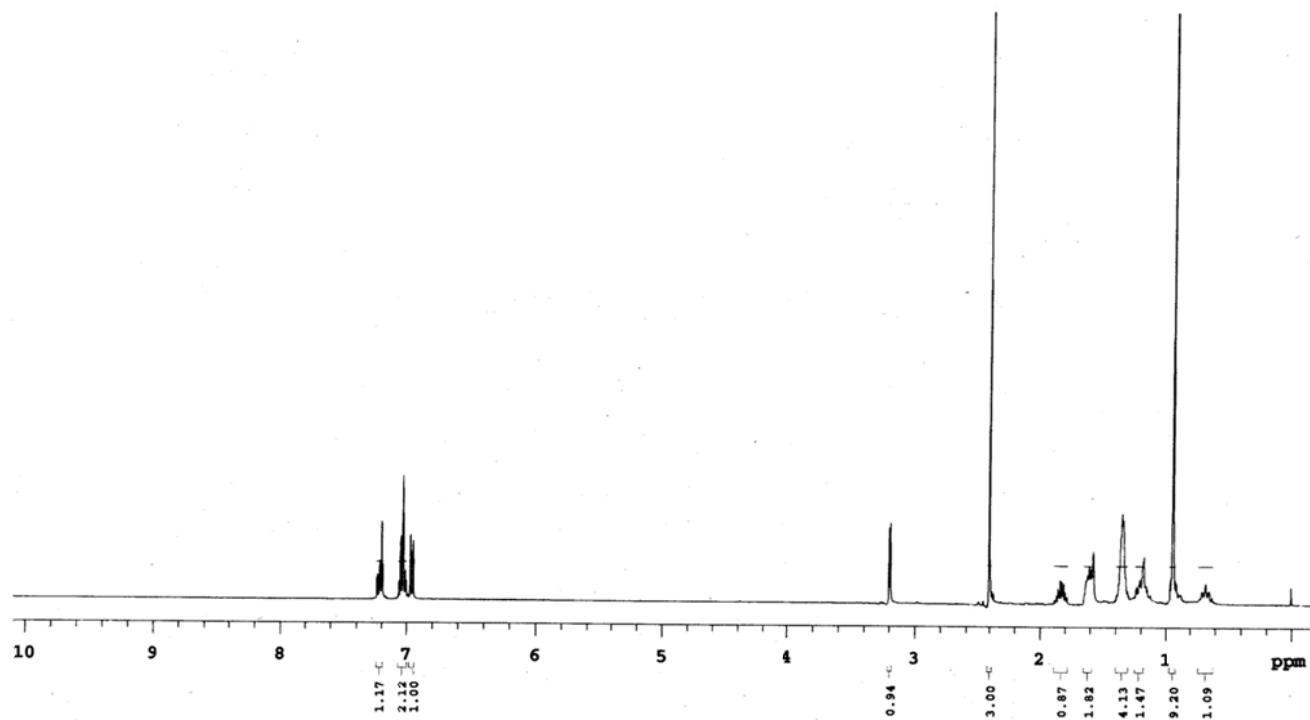

|                                                                                                                                        |                                |                                                                   |                                                                                                                                                            |
|----------------------------------------------------------------------------------------------------------------------------------------|--------------------------------|-------------------------------------------------------------------|------------------------------------------------------------------------------------------------------------------------------------------------------------|
| <p>PULSE SEQUENCE<br/>Relax. delay 1.000 sec<br/>Pulse 45.0 degrees<br/>Acq. time 2.561 sec<br/>Width 6398.0 Hz<br/>32 repetitions</p> | <p>OBSERVE H1, 399.8509847</p> | <p>DATA PROCESSING<br/>FT size 32768<br/>Total time 1 minutes</p> | <p>AB_COMe_Cyclopentane_1H<br/>Solvent: cdcl3<br/>Temp. 25.0 C / 298.1 K<br/>Operator: chem<br/>File: AB_COMe_Cyclopentane_1H<br/>Mercury-400 '1H-NMR'</p> |
|----------------------------------------------------------------------------------------------------------------------------------------|--------------------------------|-------------------------------------------------------------------|------------------------------------------------------------------------------------------------------------------------------------------------------------|



3-Acetyl-3-(*tert*-butylperoxy)-4-cyclopentylchroman-2-one (1b'):  $^{13}\text{C}$  NMR ( $\text{CDCl}_3$ , 100 MHz)

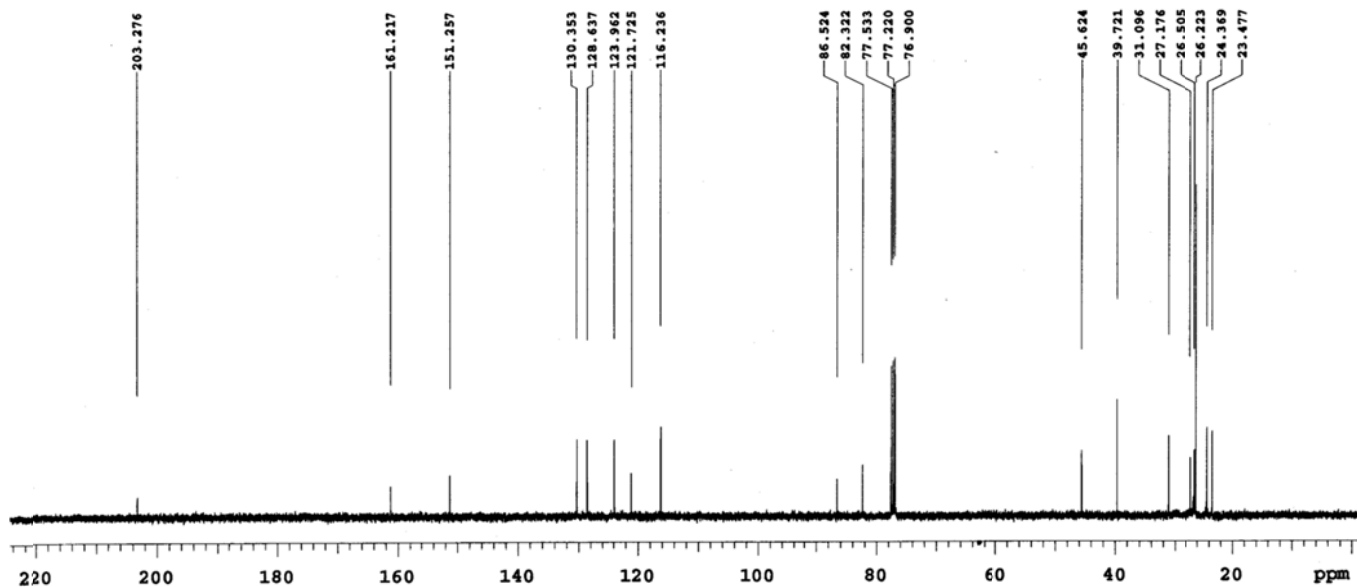

|                                                                                                                                                         |                                                                                                                                     |                                                                                                        |                                                                                                                                                                               |
|---------------------------------------------------------------------------------------------------------------------------------------------------------|-------------------------------------------------------------------------------------------------------------------------------------|--------------------------------------------------------------------------------------------------------|-------------------------------------------------------------------------------------------------------------------------------------------------------------------------------|
| <p>PULSE SEQUENCE</p> <p>Relax. delay 1.000 sec</p> <p>Pulse 45.0 degrees</p> <p>Acq. time 1.304 sec</p> <p>Width 25125.6 Hz</p> <p>520 repetitions</p> | <p>OBSERVE C13, 100.5425842</p> <p>DECOUPLE H1, 399.8529994</p> <p>Power 42 dB</p> <p>continuously on</p> <p>WALTZ-16 modulated</p> | <p>DATA PROCESSING</p> <p>Line broadening 0.5 Hz</p> <p>FT size 65536</p> <p>Total time 19 minutes</p> | <p>AB_COMe_Cyclopentane_13C</p> <p>Solvent: cdcl3</p> <p>Temp. 25.0 C / 298.1 K</p> <p>Operator: chem</p> <p>File: AB_COMe_Cyclopentane_13C</p> <p>Mercury-40: *11TG-NMR*</p> |
|---------------------------------------------------------------------------------------------------------------------------------------------------------|-------------------------------------------------------------------------------------------------------------------------------------|--------------------------------------------------------------------------------------------------------|-------------------------------------------------------------------------------------------------------------------------------------------------------------------------------|

3-(*tert*-Butylperoxy)-4-cyclohexyl-3-propionylchroman-2-one (9a'): <sup>1</sup>H NMR (CDCl<sub>3</sub>, 400 MHz)

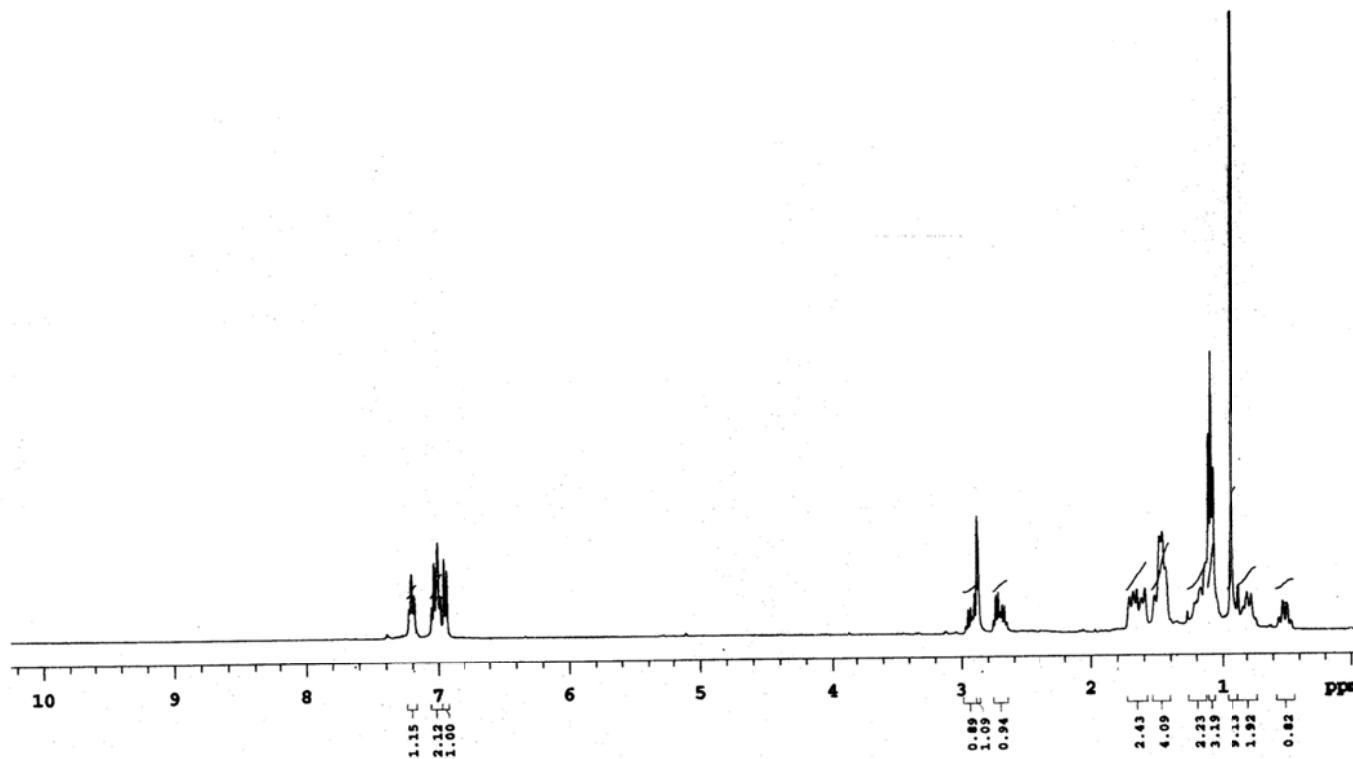

|                                                                                                                                   |                                |                                                                 |                                                                                                                                    |
|-----------------------------------------------------------------------------------------------------------------------------------|--------------------------------|-----------------------------------------------------------------|------------------------------------------------------------------------------------------------------------------------------------|
| <b>PULSE SEQUENCE</b><br>Relax. delay 1.000 sec<br>Pulse 45.0 degrees<br>Acq. time 2.561 sec<br>Width 6398.0 Hz<br>32 repetitions | <b>OBSERVE</b> H1, 399.8509836 | <b>DATA PROCESSING</b><br>FT size 32768<br>Total time 1 minutes | <b>AB-COSt-Cy-1H</b><br>Solvent: cdcl3<br>Temp. 25.0 C / 298.1 K<br>Operator: chem<br>File: AB-COSt-Cy-1H<br>Mercury-400 *HTG-MMR* |
|-----------------------------------------------------------------------------------------------------------------------------------|--------------------------------|-----------------------------------------------------------------|------------------------------------------------------------------------------------------------------------------------------------|

3-(*tert*-Butylperoxy)-4-cyclohexyl-3-propionylchroman-2-one (9a'): <sup>13</sup>C NMR (CDCl<sub>3</sub>, 100 MHz)

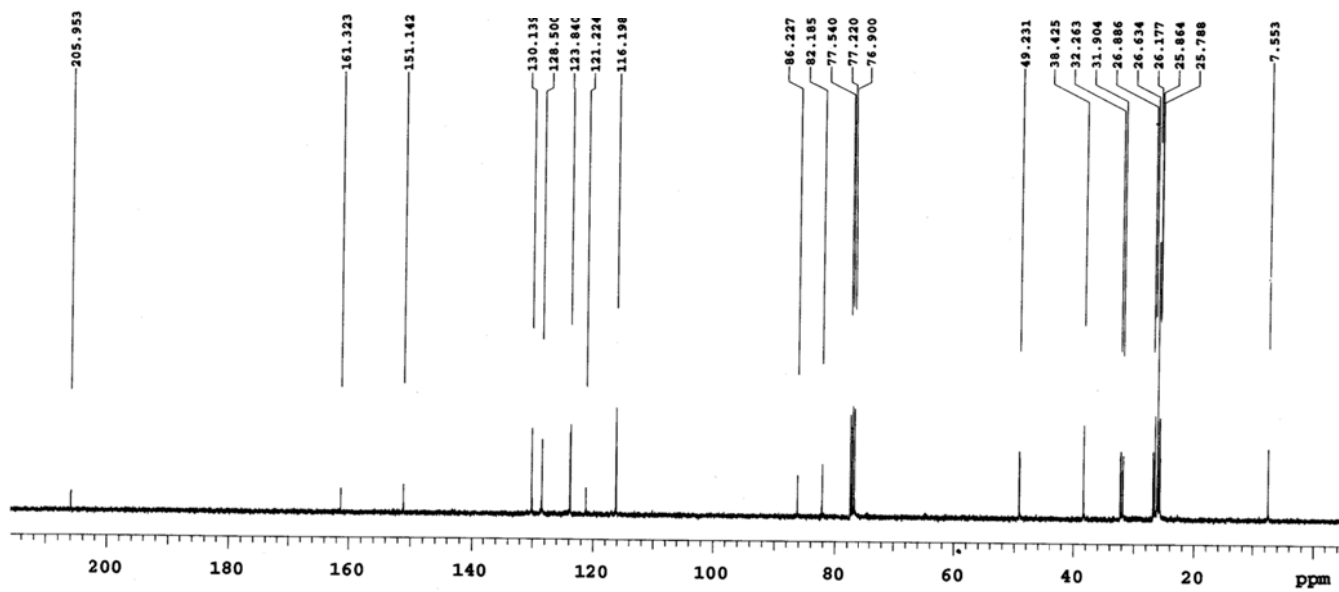

|                                                                                                                                                                                                                                      |                                                                                                                                                                                           |                                                                                                                                                         |                                                                                                                                                                                                                                       |
|--------------------------------------------------------------------------------------------------------------------------------------------------------------------------------------------------------------------------------------|-------------------------------------------------------------------------------------------------------------------------------------------------------------------------------------------|---------------------------------------------------------------------------------------------------------------------------------------------------------|---------------------------------------------------------------------------------------------------------------------------------------------------------------------------------------------------------------------------------------|
| <p><b>PULSE SEQUENCE</b><br/>                 Relax. delay 1.000 sec<br/>                 Pulse 45.0 degrees<br/>                 Acq. time 1.304 sec<br/>                 Width 25125.6 Hz<br/>                 500 repetitions</p> | <p><b>OBSERVE</b> C13, 100.5425865<br/> <b>DECOUPLE</b> H1, 399.8529994<br/>                 Power 42 dB<br/>                 continuously on<br/>                 WALTZ-16 modulated</p> | <p><b>DATA PROCESSING</b><br/>                 Line broadening 0.5 Hz<br/>                 FT size 65536<br/>                 Total time 19 minutes</p> | <p><b>AB-COEt-Cy-13C</b><br/>                 Solvent: cdcl3<br/>                 Temp. 25.0 C / 298.1 K<br/>                 Operator: chem<br/>                 File: AB-COEt-Cy-13C<br/>                 Mercury-400 *117G-MR*</p> |
|--------------------------------------------------------------------------------------------------------------------------------------------------------------------------------------------------------------------------------------|-------------------------------------------------------------------------------------------------------------------------------------------------------------------------------------------|---------------------------------------------------------------------------------------------------------------------------------------------------------|---------------------------------------------------------------------------------------------------------------------------------------------------------------------------------------------------------------------------------------|

3-(*tert*-Butylperoxy)-4-cyclohexyl-3-pentanoylchroman-2-one (10a'): <sup>1</sup>H NMR (CDCl<sub>3</sub>, 400 MHz)

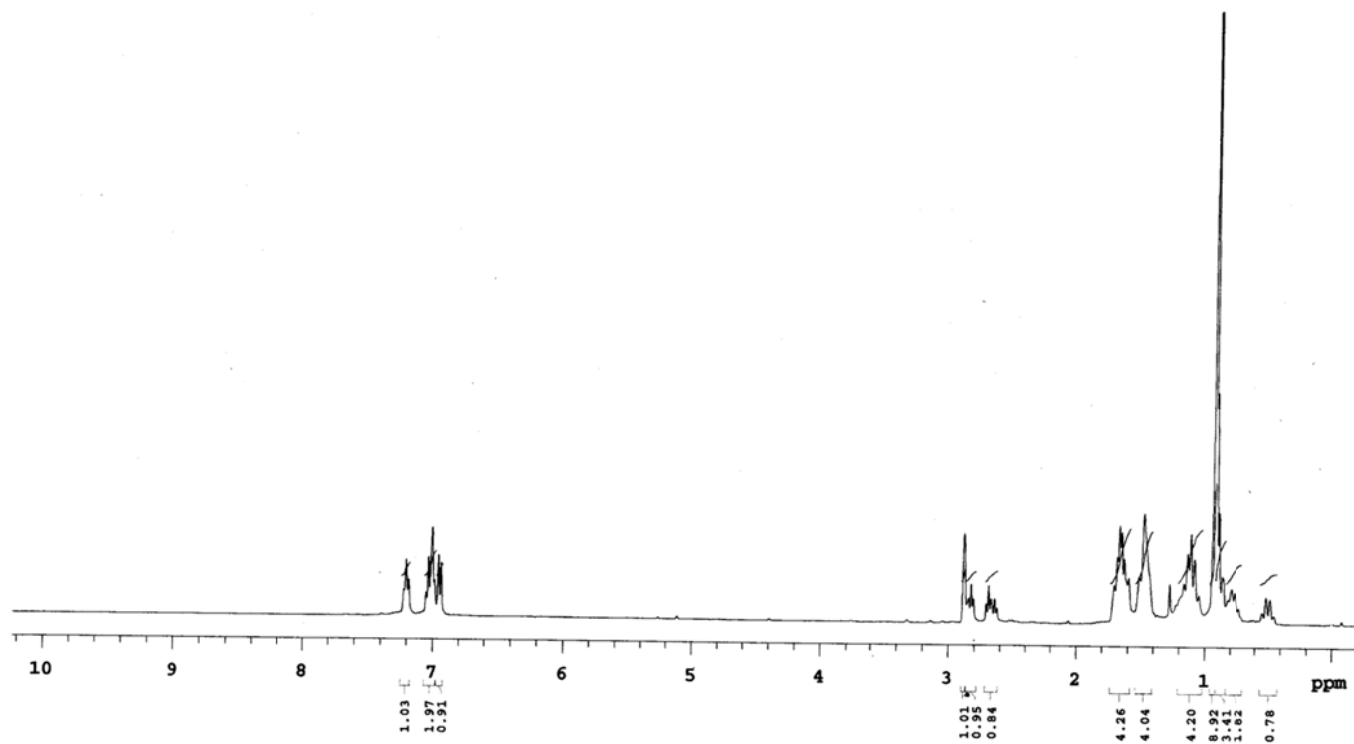

|                                                                                                                                   |                                |                                                                 |                                                                                                                                     |
|-----------------------------------------------------------------------------------------------------------------------------------|--------------------------------|-----------------------------------------------------------------|-------------------------------------------------------------------------------------------------------------------------------------|
| <b>PULSE SEQUENCE</b><br>Relax. delay 1.000 sec<br>Pulse 45.0 degrees<br>Acq. time 2.561 sec<br>Width 6398.0 Hz<br>32 repetitions | <b>OBSERVE</b> H1, 399.8509839 | <b>DATA PROCESSING</b><br>FT size 32768<br>Total time 1 minutes | <b>AB-COBU-Cy-1H</b><br>Solvent: cdcl3<br>Temp. 25.0 C / 298.1 K<br>Operator: chem<br>File: AB-COBU-Cy-1H<br>Mercury-400 "IITG-MMR" |
|-----------------------------------------------------------------------------------------------------------------------------------|--------------------------------|-----------------------------------------------------------------|-------------------------------------------------------------------------------------------------------------------------------------|

3-(*tert*-Butylperoxy)-4-cyclohexyl-3-pentanoylchroman-2-one (10a'):  $^{13}\text{C}$  NMR ( $\text{CDCl}_3$ , 100 MHz)

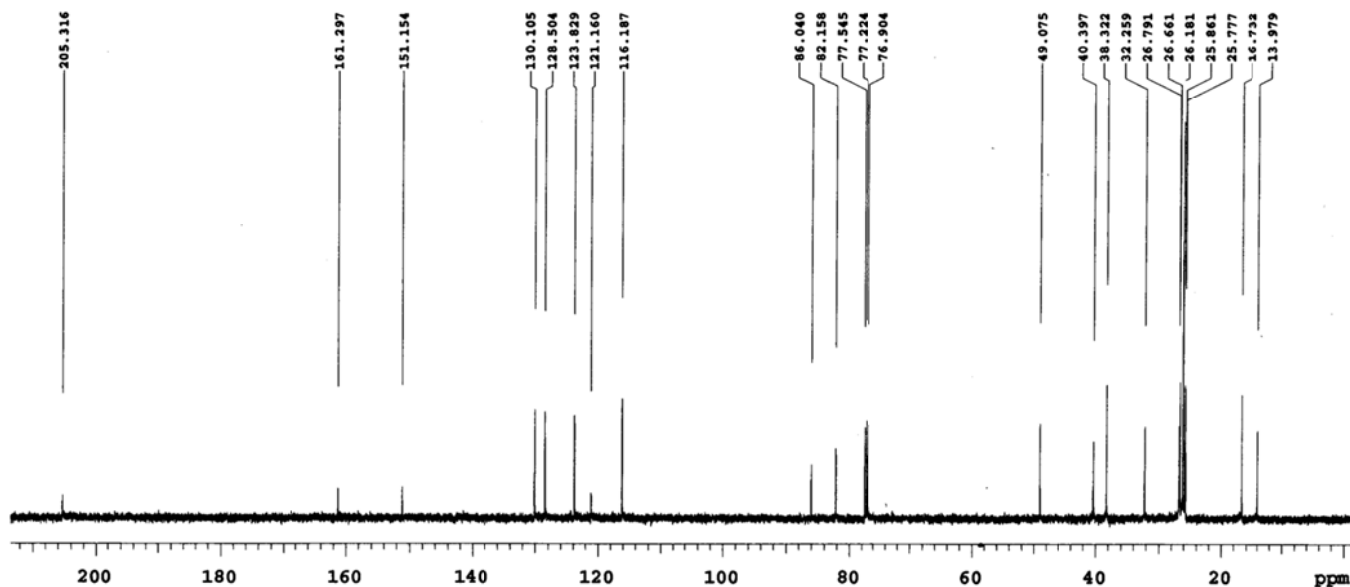

|                                                                                                                                     |                                                                                                                            |                                                                                            |                                                                                                                                       |
|-------------------------------------------------------------------------------------------------------------------------------------|----------------------------------------------------------------------------------------------------------------------------|--------------------------------------------------------------------------------------------|---------------------------------------------------------------------------------------------------------------------------------------|
| <b>PULSE SEQUENCE</b><br>Relax. delay 1.000 sec<br>Pulse 45.0 degrees<br>Acq. time 1.304 sec<br>Width 25125.6 Hz<br>270 repetitions | <b>OBSERVE</b> C13, 100.5425868<br><b>DECOUPLE</b> H1, 399.8529994<br>Power 42 dB<br>continuously on<br>WALTZ-16 modulated | <b>DATA PROCESSING</b><br>Line broadening 0.5 Hz<br>FT size 65536<br>Total time 10 minutes | <b>AB-COBU-Cy-13C</b><br>Solvent: cdc13<br>Temp. 25.0 C / 298.1 K<br>Operator: chem<br>File: AB-COBU-Cy-13C<br>Mercury-400 *IITG-NMR* |
|-------------------------------------------------------------------------------------------------------------------------------------|----------------------------------------------------------------------------------------------------------------------------|--------------------------------------------------------------------------------------------|---------------------------------------------------------------------------------------------------------------------------------------|

3-Benzoyl-3-(*tert*-butylperoxy)-4-cyclohexylchroman-2-one (11a'): <sup>1</sup>H NMR (CDCl<sub>3</sub>, 400 MHz)

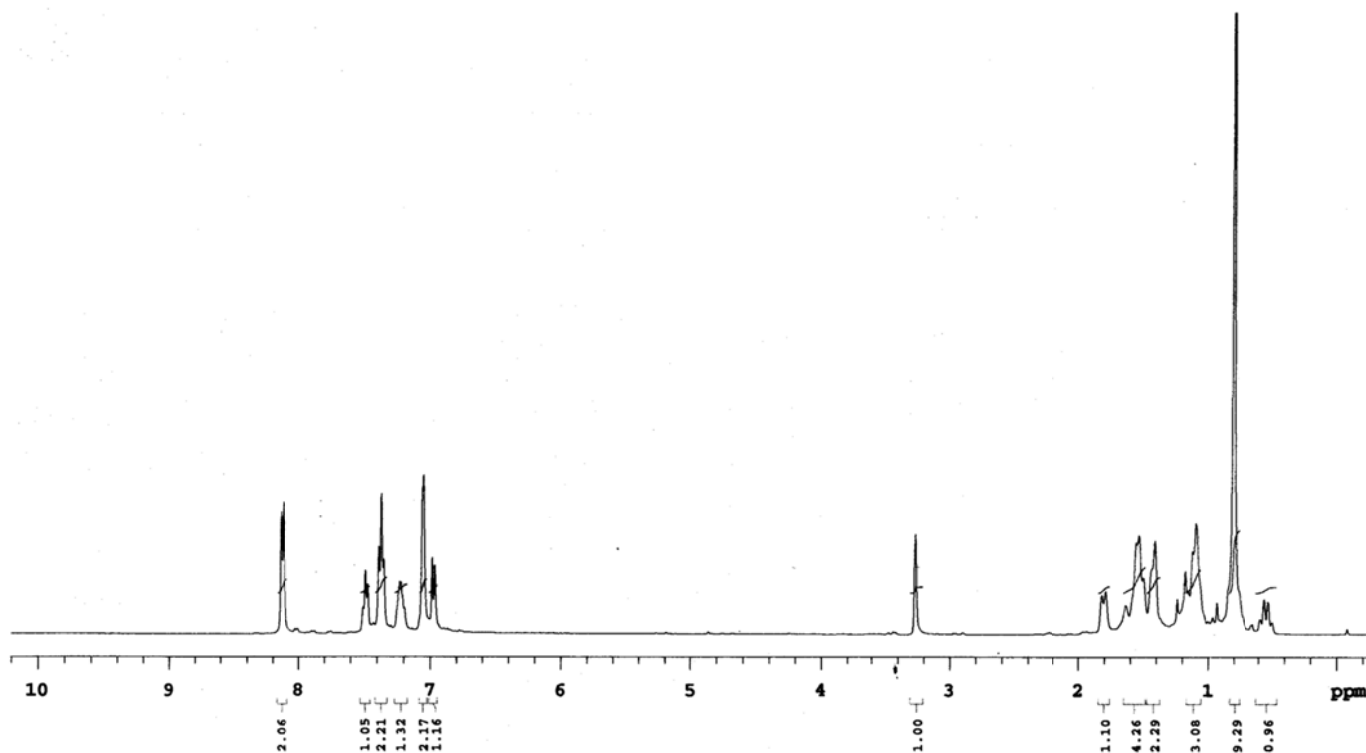

|                                                                                                                                   |                                |                                                                                           |                                                                                                                                     |
|-----------------------------------------------------------------------------------------------------------------------------------|--------------------------------|-------------------------------------------------------------------------------------------|-------------------------------------------------------------------------------------------------------------------------------------|
| <b>PULSE SEQUENCE</b><br>Relax. delay 1.000 sec<br>Pulse 45.0 degrees<br>Acq. time 2.561 sec<br>Width 6398.0 Hz<br>32 repetitions | <b>OBSERVE</b> H1, 399.8509902 | <b>DATA PROCESSING</b><br>Line broadening 1.0 Hz<br>FT size 32768<br>Total time 1 minutes | <b>AB-COPh-Cy-1H</b><br>Solvent: cdcl3<br>Temp. 25.0 C / 298.1 K<br>Operator: chem<br>File: AB-COPh-Cy-1H<br>Mercury-400 *IITG-NMR* |
|-----------------------------------------------------------------------------------------------------------------------------------|--------------------------------|-------------------------------------------------------------------------------------------|-------------------------------------------------------------------------------------------------------------------------------------|

3-Benzoyl-3-(*tert*-butylperoxy)-4-cyclohexylchroman-2-one (11a'):  $^{13}\text{C}$  NMR ( $\text{CDCl}_3$ , 100 MHz)

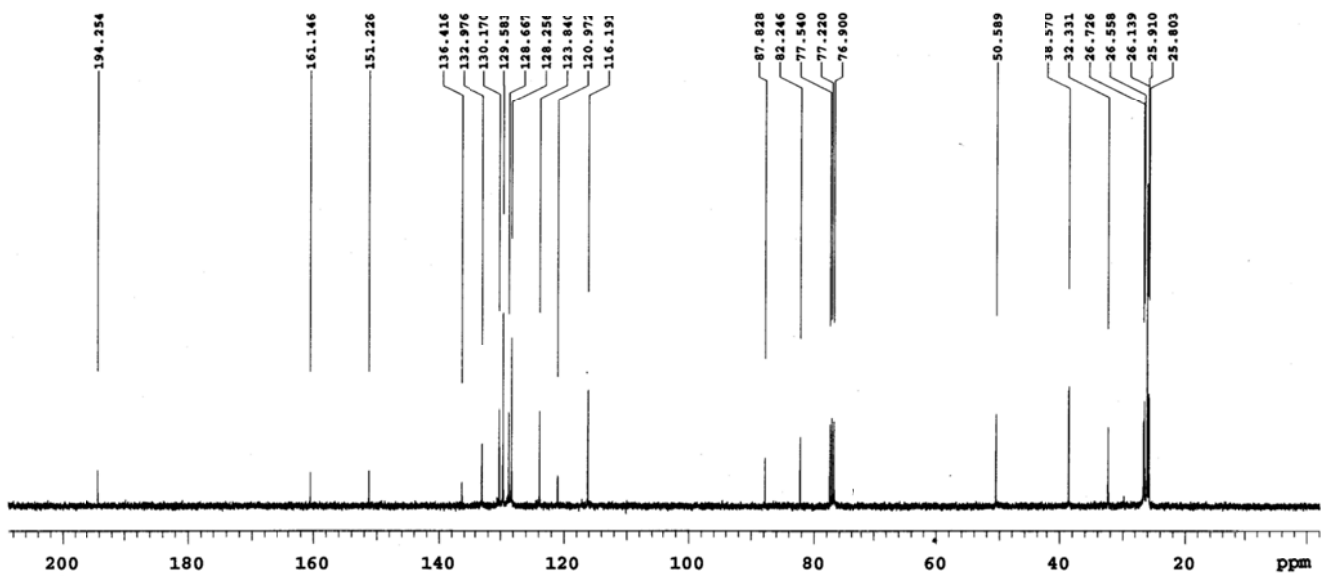

|                                                                                                                                     |                                                                                                                            |                                                                                            |                                                                                                                                      |
|-------------------------------------------------------------------------------------------------------------------------------------|----------------------------------------------------------------------------------------------------------------------------|--------------------------------------------------------------------------------------------|--------------------------------------------------------------------------------------------------------------------------------------|
| <b>PULSE SEQUENCE</b><br>Relax. delay 1.000 sec<br>Pulse 45.0 degrees<br>Acq. time 1.304 sec<br>Width 25125.6 Hz<br>410 repetitions | <b>OBSERVE</b> C13, 100.5425880<br><b>DECOUPLE</b> H1, 399.8529994<br>Power 42 dB<br>continuously on<br>WALTZ-16 modulated | <b>DATA PROCESSING</b><br>Line broadening 0.5 Hz<br>FT size 65536<br>Total time 15 minutes | <b>AB-COPh-Cy-13C</b><br>Solvent: cdcl3<br>Temp. 25.0 C / 298.1 K<br>Operator: chem<br>File: AB-COPh-Cy-13C<br>Mercury-400 *IITG-MM* |
|-------------------------------------------------------------------------------------------------------------------------------------|----------------------------------------------------------------------------------------------------------------------------|--------------------------------------------------------------------------------------------|--------------------------------------------------------------------------------------------------------------------------------------|

3-(*tert*-Butylperoxy)-4-cyclohexyl-2-oxochroman-3-carbonitrile (12a'): <sup>1</sup>H NMR (CDCl<sub>3</sub>, 400 MHz)

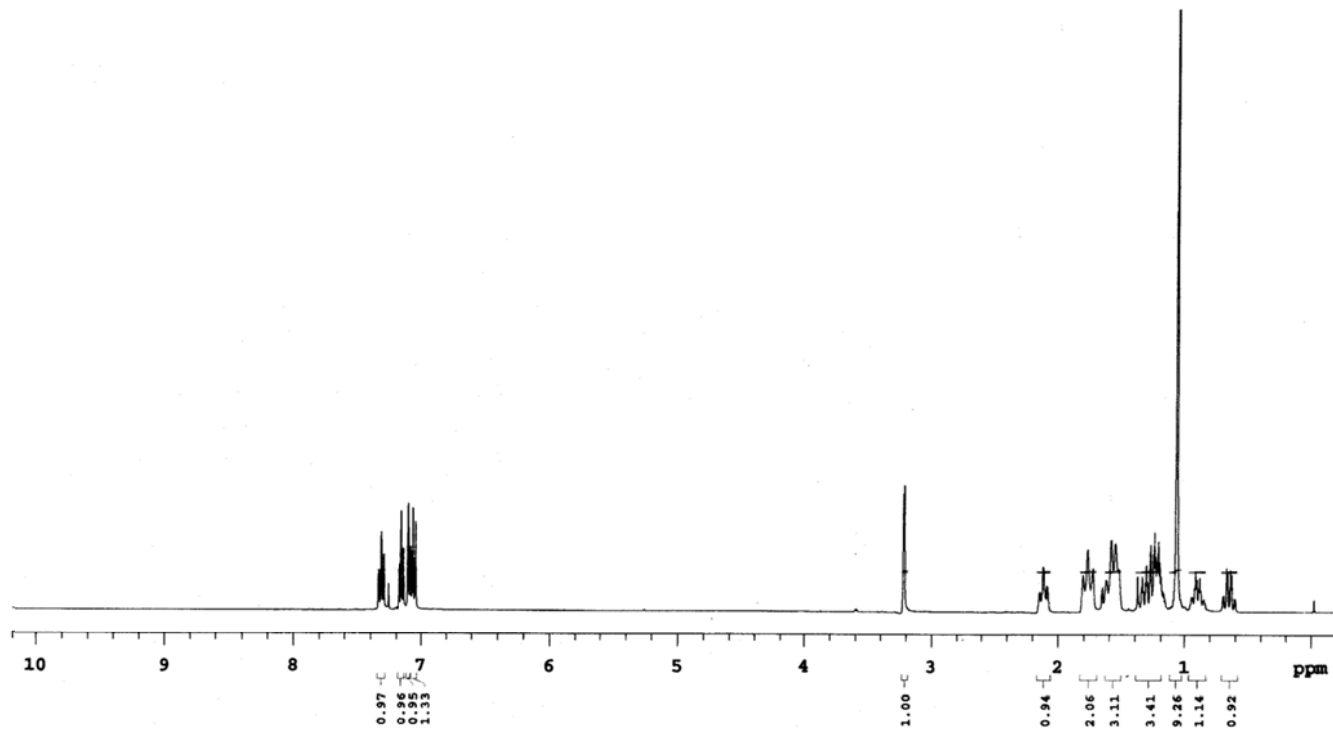

|                                                                                                                                                                                                                                    |                                       |                                                                                                            |                                                                                                                                                                                                                           |
|------------------------------------------------------------------------------------------------------------------------------------------------------------------------------------------------------------------------------------|---------------------------------------|------------------------------------------------------------------------------------------------------------|---------------------------------------------------------------------------------------------------------------------------------------------------------------------------------------------------------------------------|
| <p><b>PULSE SEQUENCE</b><br/>                 Relax. delay 1.000 sec<br/>                 Pulse 45.0 degrees<br/>                 Acq. time 2.561 sec<br/>                 Width 6398.0 Hz<br/>                 32 repetitions</p> | <p><b>OBSERVE</b> H1, 399.8509629</p> | <p><b>DATA PROCESSING</b><br/>                 FT size 32768<br/>                 Total time 1 minutes</p> | <p><b>ABCN-CO</b><br/>                 Solvent: cdcl3<br/>                 Temp. 25.0 C / 298.1 K<br/>                 Operator: chem<br/>                 File: ABCN-CO0<br/>                 Mercury-400 *IITG-NMR*</p> |
|------------------------------------------------------------------------------------------------------------------------------------------------------------------------------------------------------------------------------------|---------------------------------------|------------------------------------------------------------------------------------------------------------|---------------------------------------------------------------------------------------------------------------------------------------------------------------------------------------------------------------------------|



3-(*tert*-Butylperoxy)-4-cyclohexyl-2-oxochroman-3-carbonitrile (12a'):  $^{13}\text{C}$  NMR ( $\text{CDCl}_3$ , 100 MHz)

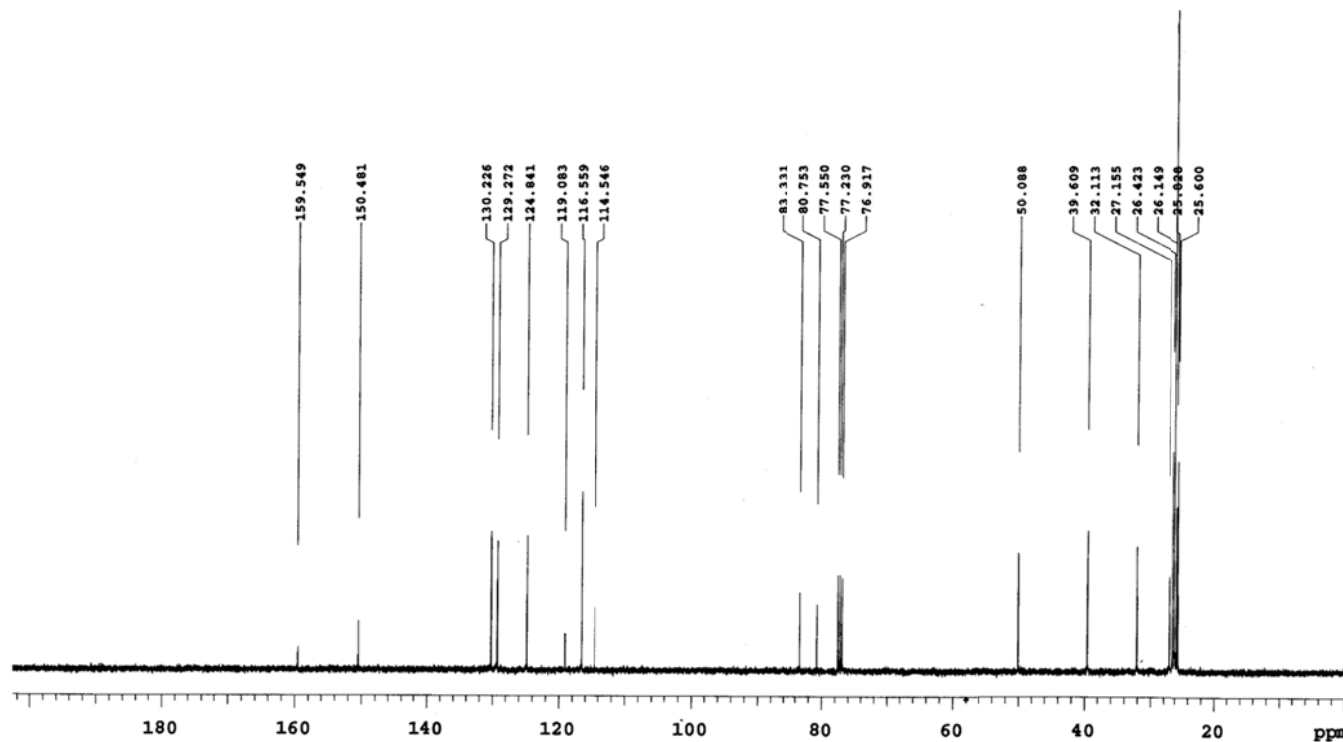

|                                                                                                                                     |                                                                                                                            |                                                                                           |                                                                                                                                           |
|-------------------------------------------------------------------------------------------------------------------------------------|----------------------------------------------------------------------------------------------------------------------------|-------------------------------------------------------------------------------------------|-------------------------------------------------------------------------------------------------------------------------------------------|
| <b>PULSE SEQUENCE</b><br>Relax. delay 1.000 sec<br>Pulse 45.0 degrees<br>Acq. time 1.304 sec<br>Width 25125.6 Hz<br>260 repetitions | <b>OBSERVE</b> C13, 100.5425870<br><b>DECOUPLE</b> H1, 399.8529994<br>Power 42 dB<br>continuously on<br>WALTZ-16 modulated | <b>DATA PROCESSING</b><br>Line broadening 0.5 Hz<br>FT size 65536<br>Total time 9 minutes | <b>AB_CN_COU_Cy_13C</b><br>Solvent: cdcl3<br>Temp. 25.0 C / 298.1 K<br>Operator: chem<br>File: AB_CN_COU_Cy_13C<br>Mercury-400 *IITG-NMR* |
|-------------------------------------------------------------------------------------------------------------------------------------|----------------------------------------------------------------------------------------------------------------------------|-------------------------------------------------------------------------------------------|-------------------------------------------------------------------------------------------------------------------------------------------|

1-(Cyclohexyloxy)-2,2,6,6-tetramethylpiperidine (1A): <sup>1</sup>H NMR (CDCl<sub>3</sub>, 400 MHz)

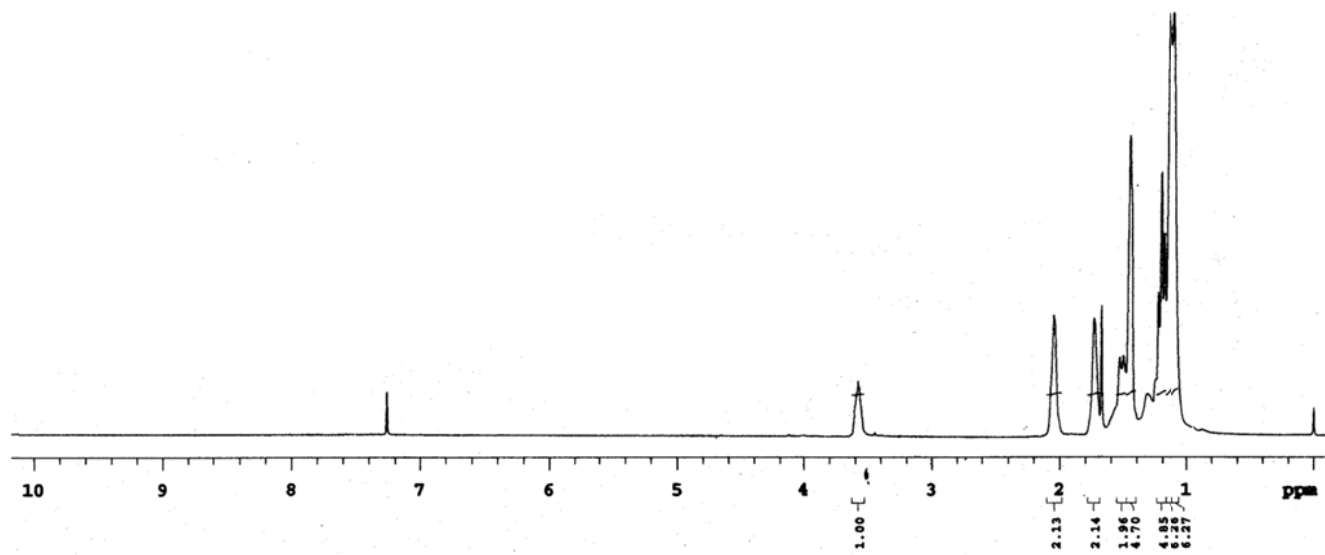

|                                                                                                                                   |                                |                                                                 |                                                                                                            |
|-----------------------------------------------------------------------------------------------------------------------------------|--------------------------------|-----------------------------------------------------------------|------------------------------------------------------------------------------------------------------------|
| <b>PULSE SEQUENCE</b><br>Relax. delay 1.000 sec<br>Pulse 45.0 degrees<br>Acq. time 2.561 sec<br>Width 6398.0 Hz<br>36 repetitions | <b>OBSERVE</b> H1, 399.8509625 | <b>DATA PROCESSING</b><br>FT size 32768<br>Total time 2 minutes | <b>AB-Cy-TMPO-1H</b><br>Solvent: cdcl3<br>Temp. 25.0 C / 298.1 K<br>Operator: chm<br>Mercury-400 *ITQ-MMR* |
|-----------------------------------------------------------------------------------------------------------------------------------|--------------------------------|-----------------------------------------------------------------|------------------------------------------------------------------------------------------------------------|

1-(Cyclohexyloxy)-2,2,6,6-tetramethylpiperidine (1A): <sup>13</sup>C NMR (CDCl<sub>3</sub>, 150 MHz)

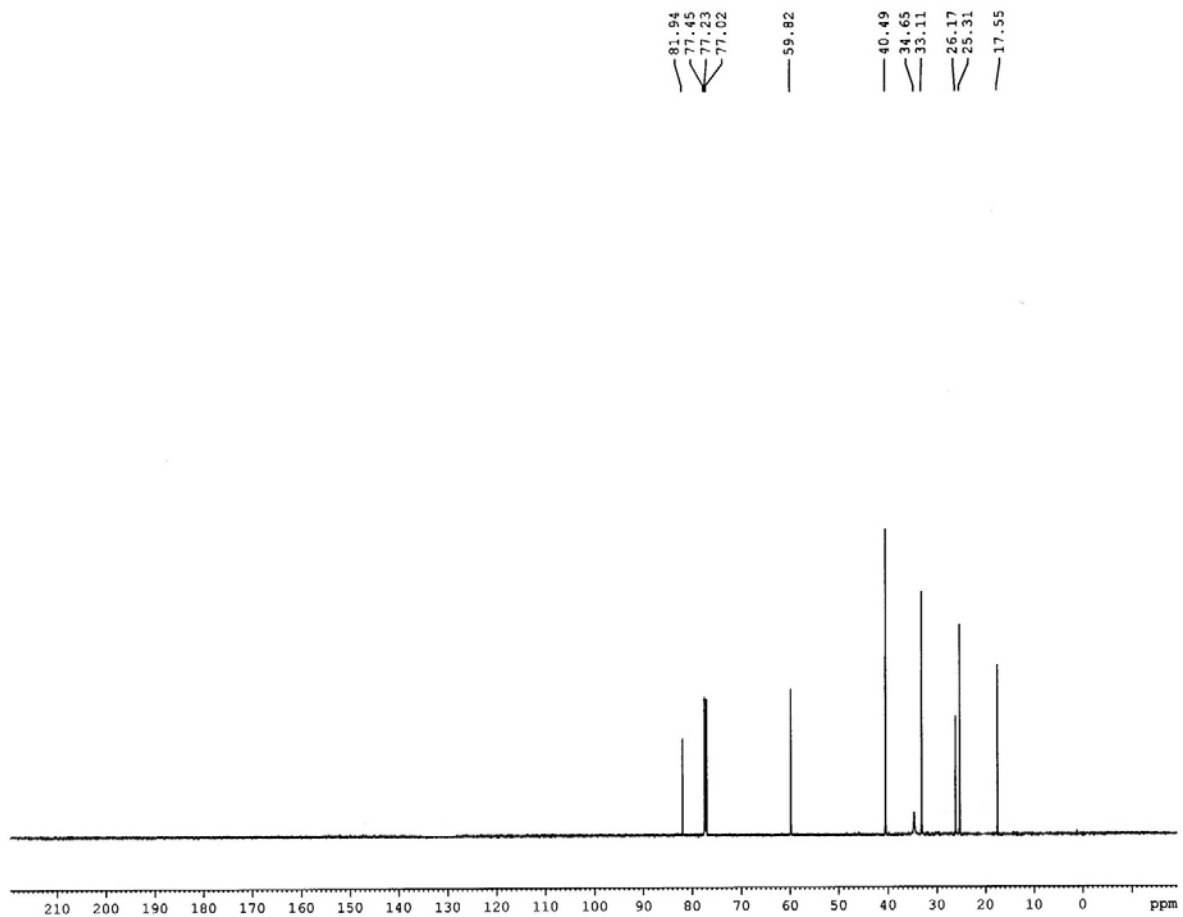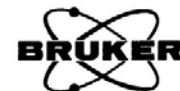

```
Current Data Parameters
NAME AB-COME-TEMPO_13C
EXPNO 1
PROCNO 1

F2 - Acquisition Parameters
Date_ 20150513
Time 14.34
INSTRUM spect
PROBHD 5 mm PABBO BB/
PULPROG zgpg30
TD 32768
SOLVENT cdc13
NS 100
DS 2
SWH 36057.691 Hz
FIDRES 1.100393 Hz
AQ 0.4543829 sec
RG 65.24
DW 13.867 usec
DE 6.50 usec
TE 299.8 K
D1 2.0000000 sec
D11 0.0300000 sec
TD0 1

----- CHANNEL f1 -----
SFO1 150.9279571 MHz
NUC1 13C
P1 10.50 usec
PLW1 95.0000000 W

----- CHANNEL f2 -----
SFO2 600.1724007 MHz
NUC2 1H
CPDPRG2 waltz16
PCPD2 70.00 usec
PLW2 21.0000000 W
PLW12 0.61714000 W
PLW13 0.30239999 W

F2 - Processing parameters
SI 16384
SF 150.9128330 MHz
WUM EM
SSB 0
LB 1.00 Hz
GB 0
PC 1.40
```

1-(Benzyloxy)-2,2,6,6-tetramethylpiperidine (1B): <sup>1</sup>H NMR (CDCl<sub>3</sub>, 400 MHz)

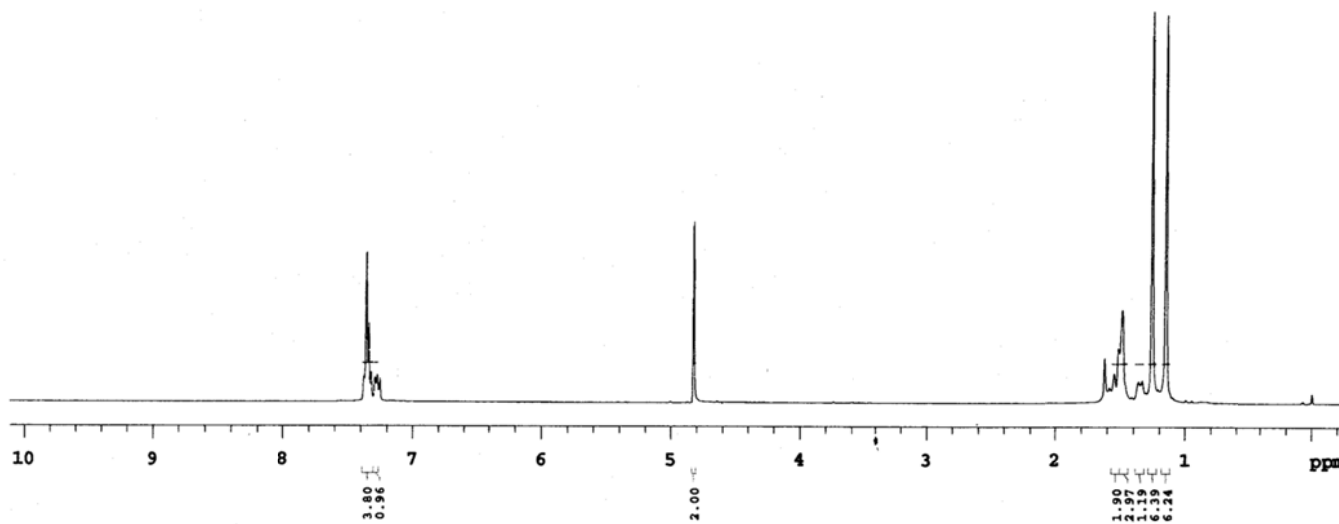

|                                                                                                                                                                                                                                                 |                                |                                                                                                             |                                                                                                                                                                                                        |
|-------------------------------------------------------------------------------------------------------------------------------------------------------------------------------------------------------------------------------------------------|--------------------------------|-------------------------------------------------------------------------------------------------------------|--------------------------------------------------------------------------------------------------------------------------------------------------------------------------------------------------------|
| <p>PULSE SEQUENCE<br/>                     Relax. delay 1.000 sec<br/>                     Pulse 45.0 degrees<br/>                     Acq. time 2.561 sec<br/>                     Width 6398.0 Hz<br/>                     32 repetitions</p> | <p>OBSERVE H1, 399.8509672</p> | <p>DATA PROCESSING<br/>                     FT size 32768<br/>                     Total time 1 minutes</p> | <p>AB-Tol-TEMPO-1H<br/>                     Solvent: cdcl3<br/>                     Temp. 25.0 C / 298.1 K<br/>                     Operator: chem<br/>                     Mercury-400 *IITG-NMR*</p> |
|-------------------------------------------------------------------------------------------------------------------------------------------------------------------------------------------------------------------------------------------------|--------------------------------|-------------------------------------------------------------------------------------------------------------|--------------------------------------------------------------------------------------------------------------------------------------------------------------------------------------------------------|

1-(Benzyloxy)-2,2,6,6-tetramethylpiperidine (1B):  $^{13}\text{C}$  NMR ( $\text{CDCl}_3$ , 150 MHz)

AB-TOi-TPO\_13C

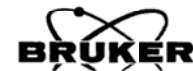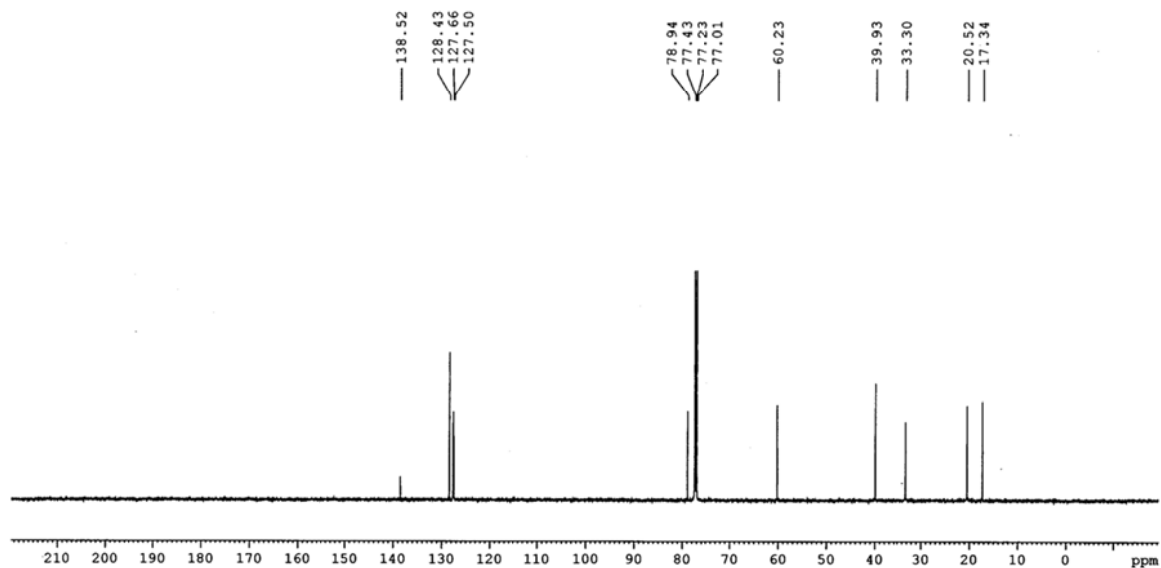

Current Data Parameters  
NAME AB-TOi-TPO\_13C  
EXPNO 1  
PROCNO 1

F2 - Acquisition Parameters  
Date\_ 20150430  
Time\_ 16.12  
INSTRUM spect  
PROBHD 5 mm  $\beta$ ABBO BB/  
PULPROG zgpg30  
TD 32768  
SOLVENT CDCl3  
NS 131  
DS 2  
SWH 36057.691 Hz  
FIDRES 1.100393 Hz  
AQ 0.4543829 sec  
RG 65.24  
DW 13.867 usec  
DE 6.50 usec  
TE 296.6 K  
D1 2.0000000 sec  
D11 0.0300000 sec  
TDO 1

----- CHANNEL f1 -----  
SFO1 156.9279571 MHz  
NUC1 13C  
P1 10.50 usec  
PLW1 95.0000000 W

----- CHANNEL f2 -----  
SFO2 606.1724007 MHz  
NUC2 1H  
CPDPRG2 waltz16  
PCPD2 70.00 usec  
PLW2 21.0000000 W  
PLW12 0.61714000 W  
PLW13 0.30239999 W

F2 - Processing parameters  
SI 16384  
SF 150.9128370 MHz  
WDW EM  
SSB 0  
LB 1.00 Hz  
GB 0  
PC 1.40
